# Supplementary material for: Efficient multigram procedure for the synthesis of large hydrazone-linked molecular cages
Source: Royal Society of Chemistry journal article supplement (doi:10.1039/d3qo00480e), 2023-01-01
Supplement: d3qo00480e1.pdf [file d3qo00480e1.pdf]

Supporting Information for —

**Efficient Multigram Procedure for the Synthesis of Large  
Hydrazone-linked Molecular Cages**

Olav Vestrheim,<sup>a,b</sup> Mica Schenkelberg,<sup>a,b</sup> Qingsheng Dai,<sup>b</sup> Severin T. Schneebeli<sup>a,b\*</sup>

*<sup>a</sup> Departments of Industrial & Physical Pharmacy and Chemistry*

*Purdue University*

*575 Stadium Mall Drive*

*West Lafayette, Indiana 47907, USA*

*<sup>b</sup> Department of Chemistry and Materials Science Program*

*The University of Vermont,*

*82 University Place,*

*Burlington, Vermont 05405, USA*

\*Corresponding Author E-mail: [schneebeli@purdue.edu](mailto:schneebeli@purdue.edu)

## I. General Methods and Materials

$^1\text{H}$  NMR spectra were recorded at 298 K on a Varian Unity Inova 500 (500 MHz) spectrometer, a Bruker ARX 500 (500 MHz) spectrometer or a Bruker Avance-III-800 (800 MHz) spectrometer.  $^{13}\text{C}$  ( $^1\text{H}$ ) NMR spectra were recorded at 298 K on a Bruker ARX 500 (125 MHz) spectrometer or a Bruker Avance-III-800 (200 MHz) spectrometer with a QCI cryoprobe. Samples for NMR spectroscopy were dissolved in  $\text{CDCl}_3$ ,  $\text{CD}_2\text{Cl}_2$  or  $\text{DMSO-d}_6$ . The spectra were referenced to the residual solvent peak ( $\text{CDCl}_3$ : 7.26 ppm for  $^1\text{H}$  and 77.16 ppm for  $^{13}\text{C}$  ( $^1\text{H}$ ) NMR), or to tetramethylsilane (TMS, 0.00 ppm for  $^1\text{H}$  and  $^{13}\text{C}$  ( $^1\text{H}$ ) NMR) as the internal standard. Chemical shift values are reported in parts per million (ppm). Data are reported as follows: chemical shift, multiplicity (s = singlet, d = doublet, t = triplet, q = quartet, m = multiplet, br = broad peak), coupling constants (Hz), and number of protons. The raw  $^1\text{H}$  NMR and  $^{13}\text{C}$  ( $^1\text{H}$ ) NMR spectral data were processed and analyzed with the MestReNova software suite (version 14.0.1).

## II. DOSY NMR Spectroscopy

The NMR samples for  $^1\text{H}$  DOSY NMR spectroscopy were prepared in  $\text{CD}_2\text{Cl}_2$  (0.3 mL) at room temperature and recorded with chloroform-d-matched Shigemi NMR tubes. The  $^1\text{H}$  DOSY NMR spectra were acquired on a Bruker Avance-III-800 (800 MHz) spectrometer, equipped with a 5mm QCI Z-gradient cryoprobe, and a Z-axis field gradient module. The DOSY pulse program used was a standard double-stimulated-echo experiment with bipolar gradient pulses and convection compensation. All experiments were acquired at 298 K and DOSY spectra were processed/analyzed using Bruker's TopSpin (version 4.1.1) software. The hydrodynamic radii were estimated using the Stokes-Einstein equation. This equation was solved for  $r$  using values for  $\eta$  from the literature.

$$r = \frac{k_B \cdot T}{6 \cdot \pi \cdot \eta \cdot D}$$

$D$  is the measured diffusion coefficient ( $\text{m}^2/\text{s}$ )

$k_B$  is Boltzmann constant ( $1.3806485 \cdot 10^{-23} \text{ kg m}^2/\text{s}^2 \text{ K}$ )

$T$  is the temperature (K)

$r$  is the solvodynamic radius of the analyte (m)

$\eta$  is the viscosity of the solvent ( $0.00041 \text{ kg/m s}$ )

**Table S1.** Diffusion coefficients measured by  $^1\text{H}$  DOSY NMR spectroscopy in  $\text{CD}_2\text{Cl}_2$  for the molecular cages **10**, **11**, **12**, and **13**. The corresponding solvodynamic radii  $r$  were determined with the Stokes-Einstein Equation. See Figures SX–SX for the  $^1\text{H}$  DOSY NMR spectra.

| Compound  | T [K] | Log $D$ [ $\log(\text{m}^2/\text{s})$ ] | $D \cdot 10^{-10}$ [ $\text{m}^2/\text{s}$ ] | $r$ (nm) |
|-----------|-------|-----------------------------------------|----------------------------------------------|----------|
| <b>10</b> | 298   | −9.56                                   | 2.75                                         | 1.9      |
| <b>11</b> | 298   | −9.67                                   | 2.14                                         | 2.5      |
| <b>12</b> | 298   | −9.70                                   | 2.00                                         | 2.7      |
| <b>13</b> | 298   | −9.85                                   | 1.41                                         | 3.8      |

### III. Computational Details

**Quantum Mechanical Calculations.** All structures were optimized with the Jaguar software package<sup>1,2</sup> at the B3LYP/LACVP\* level<sup>3,4,5,6</sup> of theory. The structures of the molecular cages **10**, **11**, **12**, and **13** were optimized for model compounds with the peripheral  $-(\text{CH}_2)_4(\text{OCH}_2\text{CH}_2)_3\text{OCH}_3$  substituents replaced by methyl groups. Due to their very large structures (the model of cage **13**, for example, contains over 600 atoms), we had to optimize the structures of the molecular cages in cartesian coordinates, with loose (Jaguar keyword: `iaccg = 3`) convergence criteria in order to be able to get the geometry optimizations to converge.

To calculate the rotational barrier for conversion of *syn-9* to *anti-9*, we first performed a minimum energy dihedral scan at the B3LYP/LACVP\* level, which performed a rotation around one of the rotationally restricted phenyl-phenyl single in *syn-9*. This initial dihedral scan revealed structures close to the *syn-9* to *anti-9* transition state and the two structures closest to the transition state (one to either side of the transition state) were then used as the input for an LST transition state search (with an initial LST guess of 0.5) in Jaguar. The transition state search (which was also performed at the B3LYP/LACVP\* level) then yielded the geometry of the transition state for the *syn-9* to *anti-9* atropoisomer conversion. The nature of the transition state was verified by a frequency calculation at the B3LYP/LACVP\* level, which showed one imaginary frequency at  $32 \text{ cm}^{-1}$ .

Finally, to ensure that we found the correct transition state for the *syn-9* to *anti-9* conversion, we performed an intrinsic reaction coordinate scan (Figure 2a) at the B3LYP/LACVP\* level, which proceeded energetically downhill in both directions from the transition state to afford *anti-9* in the forward direction, and *syn-9* in the reverse direction. To calculate the rotational barrier, we then performed single point calculations at the B3LYP/aug-cc-pVDZ level on the

optimized structures of *syn-9*, *anti-9*, and the *syn-9* to *anti-9* transition state, which provided an overall activation energy of 28.5 kcal/mol for the *syn-9* to *anti-9* interconversion.

#### IV. DFT-optimized Cartesian Coordinates (in Å)

Model of *syn-9* (with the  $-(\text{CH}_2)_4(\text{OCH}_2\text{CH}_2)_3\text{OCH}_3$  substituents replaced by methyl groups)

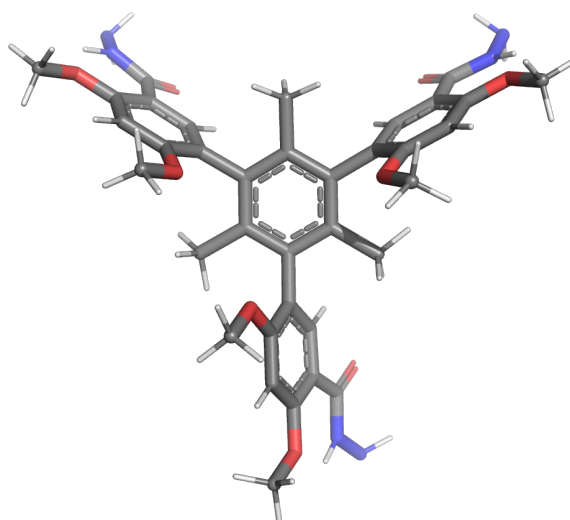

|   |         |          |          |
|---|---------|----------|----------|
| C | 3.75030 | 17.27560 | 6.42920  |
| C | 4.92550 | 17.11730 | 5.66850  |
| C | 6.18920 | 17.10980 | 6.28980  |
| C | 6.27410 | 17.26230 | 7.68970  |
| C | 5.10560 | 17.43230 | 8.45960  |
| C | 3.84660 | 17.43420 | 7.82430  |
| C | 4.65330 | 16.69080 | 1.36670  |
| C | 4.55870 | 17.95650 | 1.95630  |
| C | 4.64490 | 18.09530 | 3.34580  |
| C | 4.82930 | 16.97070 | 4.17720  |
| C | 4.91640 | 15.73040 | 3.55250  |
| C | 4.83450 | 15.54210 | 2.16300  |
| H | 4.41640 | 18.82980 | 1.33620  |
| H | 5.04790 | 14.83610 | 4.15250  |
| C | 0.31030 | 17.99920 | 10.26180 |
| C | 0.97390 | 16.75460 | 10.28570 |
| C | 2.10810 | 16.61760 | 9.46980  |
| C | 2.61120 | 17.62790 | 8.65440  |
| C | 1.92270 | 18.85910 | 8.66260  |
| C | 0.78340 | 19.04030 | 9.45480  |
| H | 2.60430 | 15.65320 | 9.49560  |
| H | 0.26890 | 19.99030 | 9.44570  |

|   |          |          |          |
|---|----------|----------|----------|
| C | 10.10290 | 17.29860 | 9.71320  |
| C | 9.44560  | 18.50050 | 9.42480  |
| C | 8.21600  | 18.48850 | 8.75820  |
| C | 7.61580  | 17.27350 | 8.36440  |
| C | 8.30830  | 16.10180 | 8.65340  |
| C | 9.54250  | 16.06510 | 9.32380  |
| H | 9.88860  | 19.44140 | 9.71870  |
| H | 7.88630  | 15.14390 | 8.36860  |
| C | 2.40420  | 17.30250 | 5.73910  |
| H | 2.20160  | 18.30260 | 5.33550  |
| H | 2.36950  | 16.59920 | 4.90270  |
| H | 1.59580  | 17.05380 | 6.42960  |
| C | 5.18230  | 17.64810 | 9.95790  |
| H | 4.59010  | 16.90720 | 10.50340 |
| H | 6.20720  | 17.58630 | 10.32310 |
| H | 4.78240  | 18.63310 | 10.22870 |
| C | 7.44160  | 16.95810 | 5.44960  |
| H | 8.32070  | 17.33980 | 5.97180  |
| H | 7.63870  | 15.90520 | 5.20780  |
| H | 7.34630  | 17.49010 | 4.49830  |
| O | -0.80220 | 18.15520 | 11.05110 |
| C | -1.50090 | 19.39190 | 11.04320 |
| H | -2.33720 | 19.26620 | 11.73310 |
| H | -0.86440 | 20.21480 | 11.39170 |
| H | -1.88800 | 19.62660 | 10.04390 |
| O | 11.30660 | 17.28330 | 10.37340 |
| O | 4.56660  | 16.52670 | 0.00630  |
| C | 4.38230  | 17.66100 | -0.82780 |
| H | 3.44020  | 18.17630 | -0.60200 |
| H | 5.21740  | 18.36660 | -0.73470 |
| H | 4.34710  | 17.27620 | -1.84880 |
| C | 11.86570 | 18.50240 | 10.84070 |
| H | 12.10630 | 19.17830 | 10.01040 |
| H | 11.19070 | 19.00880 | 11.54210 |
| H | 12.78610 | 18.22760 | 11.35910 |
| O | 2.43180  | 19.83810 | 7.86390  |
| O | 4.55870  | 19.30040 | 3.97620  |
| O | 7.52260  | 19.62160 | 8.45780  |
| C | 4.40670  | 20.47550 | 3.20020  |
| H | 3.47030  | 20.46600 | 2.62560  |
| H | 5.25050  | 20.61920 | 2.51180  |
| H | 4.38160  | 21.30200 | 3.91330  |
| C | 1.78400  | 21.09670 | 7.81510  |
| H | 2.36450  | 21.70290 | 7.11690  |
| H | 0.75300  | 21.00980 | 7.44610  |
| H | 1.77500  | 21.58850 | 8.79750  |
| C | 8.05450  | 20.87850 | 8.83670  |
| H | 7.33090  | 21.62230 | 8.49720  |
| H | 9.02300  | 21.07140 | 8.35520  |
| H | 8.17070  | 20.95860 | 9.92590  |

|   |          |          |          |
|---|----------|----------|----------|
| C | 10.11100 | 14.68950 | 9.55310  |
| O | 9.56010  | 13.68410 | 9.10060  |
| N | 11.25440 | 14.58230 | 10.29240 |
| H | 11.77340 | 15.39840 | 10.57720 |
| N | 11.88470 | 13.33770 | 10.48660 |
| C | 4.93710  | 14.11310 | 1.69910  |
| O | 5.00830  | 13.18170 | 2.50330  |
| N | 4.92620  | 12.55580 | -0.14730 |
| H | 4.74870  | 14.60590 | -0.30660 |
| N | 4.95960  | 13.87320 | 0.35370  |
| C | 0.61990  | 15.54430 | 11.10920 |
| O | 1.32490  | 14.53320 | 11.09900 |
| N | -0.51300 | 15.59510 | 11.87060 |
| H | -1.03170 | 16.45360 | 11.97840 |
| N | -0.85600 | 14.54290 | 12.74170 |
| H | -1.09500 | 13.73750 | 12.16010 |
| H | 0.00400  | 14.26350 | 13.21860 |
| H | 11.25330 | 12.76860 | 11.05390 |
| H | 11.89690 | 12.86970 | 9.57780  |
| H | 5.83700  | 12.13710 | 0.05070  |
| H | 4.27540  | 12.03530 | 0.44500  |

**Model of *anti*-9** (with the  $-(\text{CH}_2)_4(\text{OCH}_2\text{CH}_2)_3\text{OCH}_3$  substituents replaced by methyl groups)

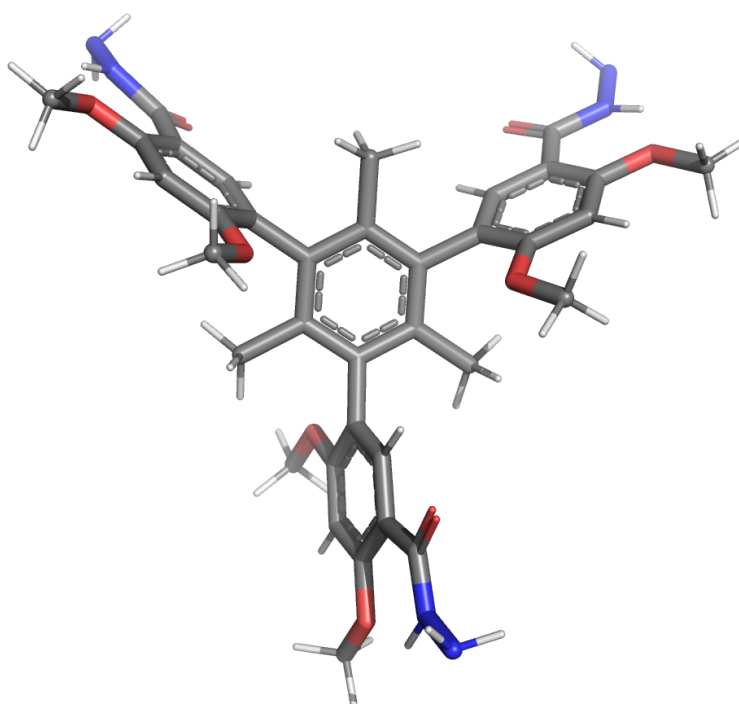

|   |          |          |          |
|---|----------|----------|----------|
| C | 3.81490  | 17.60990 | 6.39620  |
| C | 5.02070  | 17.41900 | 5.69640  |
| C | 6.20280  | 17.07080 | 6.38340  |
| C | 6.16390  | 16.88850 | 7.77980  |
| C | 4.95800  | 17.06880 | 8.48980  |
| C | 3.79420  | 17.44720 | 7.79540  |
| C | 5.23990  | 17.93400 | 1.40340  |
| C | 5.14600  | 19.05120 | 2.24130  |
| C | 5.06530  | 18.88770 | 3.62880  |
| C | 5.06970  | 17.60100 | 4.20770  |
| C | 5.15430  | 16.51670 | 3.34000  |
| C | 5.24500  | 16.63190 | 1.94360  |
| H | 5.13930  | 20.04450 | 1.81650  |
| H | 5.15430  | 15.50860 | 3.74100  |
| C | 0.15660  | 18.17780 | 10.02990 |
| C | 1.07240  | 19.23260 | 9.83680  |
| C | 2.23250  | 18.94690 | 9.09720  |
| C | 2.52400  | 17.69910 | 8.55700  |
| C | 1.58340  | 16.66900 | 8.77090  |
| C | 0.41140  | 16.90710 | 9.49820  |
| H | 2.92830  | 19.76700 | 8.95600  |
| H | -0.29690 | 16.10580 | 9.65180  |
| C | 9.76260  | 15.80050 | 9.93170  |
| C | 9.24580  | 17.09750 | 10.03170 |
| C | 8.08510  | 17.45190 | 9.33480  |
| C | 7.41280  | 16.51300 | 8.52240  |
| C | 7.96270  | 15.23650 | 8.44360  |
| C | 9.12450  | 14.83630 | 9.12430  |
| H | 9.74660  | 17.83090 | 10.64700 |
| H | 7.48330  | 14.48280 | 7.82810  |
| C | 2.55470  | 18.00790 | 5.65810  |
| H | 2.43800  | 19.09920 | 5.64240  |
| H | 2.57760  | 17.66560 | 4.62010  |
| H | 1.66420  | 17.59280 | 6.13550  |
| C | 4.91880  | 16.86880 | 9.99050  |
| H | 3.93240  | 16.54140 | 10.32500 |
| H | 5.65300  | 16.12460 | 10.31050 |
| H | 5.14870  | 17.80370 | 10.51770 |
| C | 7.50340  | 16.92330 | 5.61770  |
| H | 8.36620  | 17.03170 | 6.27660  |
| H | 7.58340  | 15.93960 | 5.13750  |
| H | 7.57920  | 17.67090 | 4.82270  |
| O | -0.98500 | 18.43790 | 10.74640 |
| C | -1.92640 | 17.39720 | 10.96880 |
| H | -2.73150 | 17.84590 | 11.55390 |
| H | -2.33360 | 17.01560 | 10.02380 |
| H | -1.48130 | 16.57030 | 11.53700 |
| O | 10.89910 | 15.42920 | 10.60600 |

|   |          |          |          |
|---|----------|----------|----------|
| O | 5.32320  | 18.06670 | 0.03960  |
| C | 5.31380  | 19.36270 | -0.54140 |
| H | 4.38200  | 19.89620 | -0.31540 |
| H | 6.16940  | 19.96010 | -0.20210 |
| H | 5.38760  | 19.20570 | -1.61910 |
| C | 11.55010 | 16.36460 | 11.45340 |
| H | 11.91450 | 17.23210 | 10.88870 |
| H | 10.88680 | 16.70370 | 12.25900 |
| H | 12.39980 | 15.83250 | 11.88500 |
| O | 1.89470  | 15.45970 | 8.23270  |
| O | 4.98320  | 19.93330 | 4.49600  |
| O | 7.54010  | 18.69760 | 9.38850  |
| C | 4.98710  | 21.25690 | 3.98960  |
| H | 4.12760  | 21.44150 | 3.33150  |
| H | 5.91440  | 21.47800 | 3.44450  |
| H | 4.91780  | 21.90850 | 4.86250  |
| C | 1.00570  | 14.36950 | 8.41230  |
| H | 1.46910  | 13.52160 | 7.90460  |
| H | 0.87400  | 14.12760 | 9.47540  |
| H | 0.02460  | 14.56960 | 7.96090  |
| C | 8.15930  | 19.69320 | 10.18540 |
| H | 7.54380  | 20.58760 | 10.07330 |
| H | 9.17960  | 19.90930 | 9.84130  |
| H | 8.18780  | 19.40420 | 11.24430 |
| C | 9.54820  | 13.40960 | 8.89500  |
| O | 8.92130  | 12.66710 | 8.13630  |
| N | 10.65350 | 12.95460 | 9.55600  |
| H | 11.23350 | 13.57790 | 10.09620 |
| N | 11.16800 | 11.66490 | 9.31870  |
| C | 5.34210  | 15.33010 | 1.19390  |
| O | 5.23130  | 14.24690 | 1.77190  |
| N | 5.57400  | 14.20530 | -0.93170 |
| H | 5.51500  | 16.25060 | -0.65640 |
| N | 5.57900  | 15.37970 | -0.15140 |
| C | 0.95650  | 20.64820 | 10.33460 |
| O | 1.80390  | 21.50090 | 10.05700 |
| N | -0.11650 | 20.96710 | 11.11760 |
| H | -0.87330 | 20.31440 | 11.25640 |
| N | -0.34210 | 22.29070 | 11.54360 |
| H | 0.40190  | 22.52500 | 12.20220 |
| H | -0.16470 | 22.89230 | 10.73570 |
| H | 10.47690 | 10.99770 | 9.66670  |
| H | 11.16270 | 11.52820 | 8.30560  |
| H | 6.42610  | 13.69000 | -0.70190 |
| H | 4.81880  | 13.61890 | -0.56900 |



**Transition State for *syn-9* to *anti-9* conversion** (with the  $-(\text{CH}_2)_4(\text{OCH}_2\text{CH}_2)_3\text{OCH}_3$  substituents replaced by methyl groups)

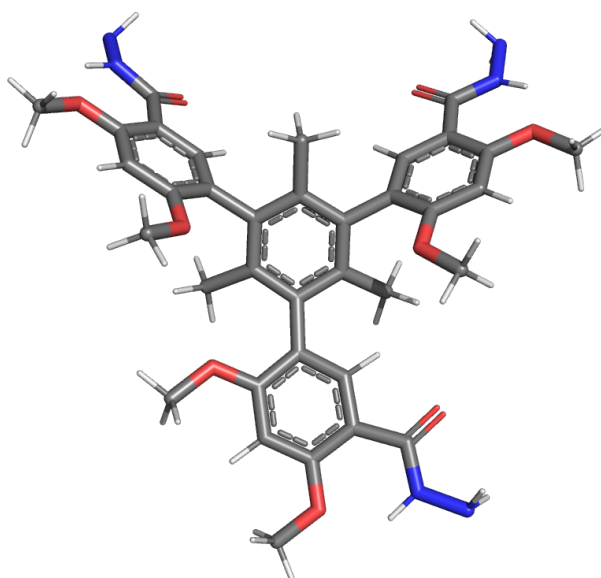

|   |          |          |          |
|---|----------|----------|----------|
| C | 3.67790  | 17.02520 | 6.25430  |
| C | 4.90530  | 17.14470 | 5.56850  |
| C | 6.12250  | 17.27150 | 6.26020  |
| C | 6.10920  | 17.02630 | 7.64490  |
| C | 4.89050  | 16.88270 | 8.33850  |
| C | 3.64980  | 17.16110 | 7.67710  |
| C | 4.98360  | 17.11380 | 1.23820  |
| C | 4.50780  | 18.23670 | 1.92500  |
| C | 4.47320  | 18.24560 | 3.32380  |
| C | 4.91720  | 17.13160 | 4.06780  |
| C | 5.37940  | 16.03490 | 3.34660  |
| C | 5.42990  | 15.97890 | 1.94450  |
| H | 4.16670  | 19.10120 | 1.37390  |
| H | 5.72260  | 15.15180 | 3.87550  |
| C | 0.32830  | 18.42270 | 10.27530 |
| C | 1.62880  | 18.23990 | 10.78040 |
| C | 2.61790  | 17.85960 | 9.87050  |
| C | 2.46130  | 17.61250 | 8.49140  |
| C | 1.19020  | 18.06350 | 8.01610  |
| C | 0.13990  | 18.37390 | 8.89690  |
| H | 3.59460  | 17.80670 | 10.31350 |
| H | -0.82760 | 18.61840 | 8.48460  |
| C | 9.72480  | 16.58280 | 9.98210  |
| C | 8.85350  | 17.65020 | 10.22600 |
| C | 7.69970  | 17.81220 | 9.45260  |
| C | 7.38780  | 16.90230 | 8.41590  |

|   |          |          |          |
|---|----------|----------|----------|
| C | 8.29230  | 15.86820 | 8.19080  |
| C | 9.46150  | 15.66770 | 8.94210  |
| H | 9.07100  | 18.35490 | 11.01560 |
| H | 8.09540  | 15.14330 | 7.40830  |
| C | 2.49870  | 16.52600 | 5.43560  |
| H | 2.06700  | 17.28400 | 4.77660  |
| H | 2.85600  | 15.70850 | 4.79930  |
| H | 1.70510  | 16.12820 | 6.06610  |
| C | 4.96460  | 16.22570 | 9.71400  |
| H | 4.01630  | 15.75490 | 9.98120  |
| H | 5.72330  | 15.43740 | 9.67260  |
| H | 5.24950  | 16.89300 | 10.53450 |
| C | 7.40610  | 17.58240 | 5.52080  |
| H | 8.15720  | 17.99430 | 6.19840  |
| H | 7.84370  | 16.69150 | 5.05220  |
| H | 7.22660  | 18.30680 | 4.71990  |
| O | -0.69130 | 18.69880 | 11.14910 |
| C | -2.01180 | 18.86070 | 10.65050 |
| H | -2.64550 | 19.00830 | 11.52680 |
| H | -2.08890 | 19.73850 | 9.99660  |
| H | -2.34340 | 17.96770 | 10.10660 |
| O | 10.85440 | 16.39610 | 10.73890 |
| O | 5.02510  | 17.07740 | -0.13390 |
| C | 4.58200  | 18.20240 | -0.87860 |
| H | 3.52280  | 18.41700 | -0.68850 |
| H | 5.18170  | 19.09320 | -0.65340 |
| H | 4.71330  | 17.93460 | -1.92860 |
| C | 11.09660 | 17.24080 | 11.85520 |
| H | 11.25070 | 18.28190 | 11.54540 |
| H | 10.27310 | 17.19180 | 12.57840 |
| H | 12.00990 | 16.86470 | 12.31970 |
| O | 1.02630  | 18.26790 | 6.68550  |
| O | 4.02130  | 19.30840 | 4.04580  |
| O | 6.81740  | 18.82730 | 9.65040  |
| C | 3.58880  | 20.47410 | 3.36810  |
| H | 2.72970  | 20.27020 | 2.71390  |
| H | 4.39630  | 20.92050 | 2.77220  |
| H | 3.28780  | 21.17640 | 4.14800  |
| C | -0.17870 | 18.81400 | 6.18310  |
| H | -0.02210 | 18.92920 | 5.10880  |
| H | -1.03330 | 18.14430 | 6.34790  |
| H | -0.39500 | 19.79450 | 6.62760  |
| C | 6.98980  | 19.70030 | 10.75610 |
| H | 6.12840  | 20.36980 | 10.74020 |
| H | 7.91210  | 20.29020 | 10.66560 |
| H | 6.99650  | 19.14940 | 11.70490 |
| C | 10.28360 | 14.47080 | 8.54670  |
| O | 9.97320  | 13.76760 | 7.58290  |
| N | 11.38620 | 14.17530 | 9.29620  |
| H | 11.70710 | 14.79600 | 10.02330 |

|   |          |          |          |
|---|----------|----------|----------|
| N | 12.24650 | 13.11660 | 8.94520  |
| C | 5.95370  | 14.69030 | 1.36870  |
| O | 6.20660  | 13.72260 | 2.08870  |
| N | 6.54020  | 13.41780 | -0.59970 |
| H | 5.81500  | 15.35070 | -0.59270 |
| N | 6.15780  | 14.62550 | 0.01880  |
| C | 2.10130  | 18.45720 | 12.19180 |
| O | 3.29820  | 18.41170 | 12.49310 |
| N | 1.15550  | 18.71100 | 13.14250 |
| H | 0.18790  | 18.84980 | 12.89200 |
| N | 1.50800  | 19.01170 | 14.47240 |
| H | 1.91040  | 18.16410 | 14.87680 |
| H | 2.28870  | 19.66960 | 14.42850 |
| H | 11.71650 | 12.25030 | 9.05910  |
| H | 12.40100 | 13.18620 | 7.93710  |
| H | 7.51000  | 13.23890 | -0.33210 |
| H | 6.01030  | 12.67430 | -0.13960 |

**Model of the phenyl-linked molecular cage 10** (with the  $-(\text{CH}_2)_4(\text{OCH}_2\text{CH}_2)_3\text{OCH}_3$  substituents replaced by methyl groups)

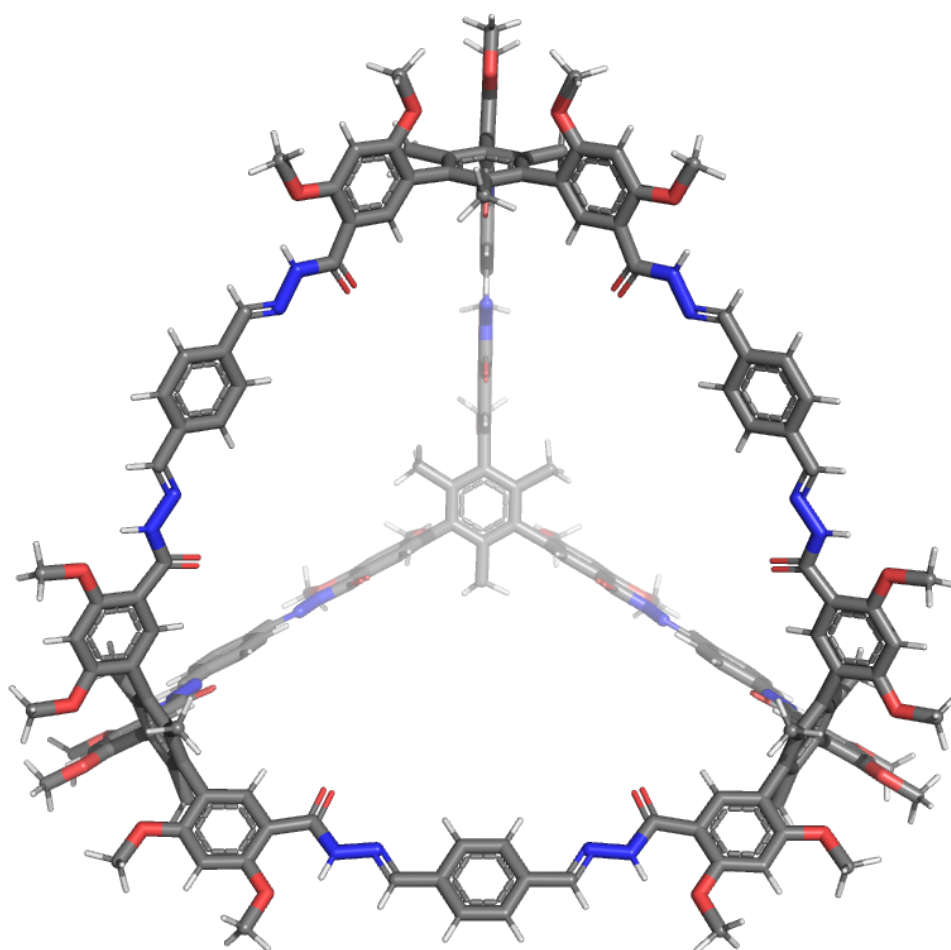

|   |          |          |           |
|---|----------|----------|-----------|
| C | 0.74150  | -3.67680 | -7.87080  |
| C | -0.42300 | -2.93400 | -8.10980  |
| C | -1.69680 | -3.51060 | -7.91490  |
| C | -1.79250 | -4.84400 | -7.49000  |
| C | -0.62860 | -5.60480 | -7.24410  |
| C | 0.62990  | -5.01550 | -7.43480  |
| C | -0.16460 | 1.07840  | -9.69890  |
| C | -0.22120 | -0.02040 | -10.56080 |
| C | -0.30900 | -1.31520 | -10.04230 |
| C | -0.33510 | -1.53800 | -8.65010  |
| C | -0.28390 | -0.42050 | -7.82680  |
| C | -0.19920 | 0.89940  | -8.30060  |
| H | -0.19790 | 0.13200  | -11.63020 |
| H | -0.30470 | -0.54570 | -6.74890  |
| C | 4.23620  | -7.35370 | -6.96610  |
| C | 3.72030  | -6.66690 | -5.84860  |
| C | 2.54710  | -5.91810 | -6.04350  |
| C | 1.88060  | -5.82390 | -7.25820  |
| C | 2.43310  | -6.51970 | -8.35290  |
| C | 3.59750  | -7.27900 | -8.20780  |
| H | 2.15730  | -5.39630 | -5.17520  |
| H | 4.00560  | -7.80850 | -9.05650  |
| C | -5.69810 | -6.68730 | -7.25170  |
| C | -4.96820 | -6.72370 | -8.44350  |
| C | -3.70060 | -6.13870 | -8.50750  |
| C | -3.13760 | -5.50140 | -7.38200  |
| C | -3.88910 | -5.49620 | -6.21360  |
| C | -5.16710 | -6.07120 | -6.10050  |
| H | -5.38530 | -7.20400 | -9.31680  |
| H | -3.49550 | -5.01520 | -5.32380  |
| C | 2.11550  | -3.08500 | -8.10910  |
| H | 2.77660  | -3.25590 | -7.25320  |
| H | 2.59260  | -3.55270 | -8.98050  |
| H | 2.06910  | -2.00970 | -8.28950  |
| C | -0.76710 | -7.05250 | -6.82110  |
| H | 0.18930  | -7.48000 | -6.51560  |
| H | -1.46720 | -7.15760 | -5.98590  |
| H | -1.16110 | -7.66060 | -7.64640  |
| C | -2.93320 | -2.68740 | -8.20850  |
| H | -3.84020 | -3.18810 | -7.86920  |
| H | -2.88450 | -1.70730 | -7.72290  |
| H | -3.03100 | -2.50600 | -9.28630  |
| O | 5.38250  | -8.09730 | -6.80310  |
| C | 5.91910  | -8.81560 | -7.90330  |
| H | 6.80710  | -9.32380 | -7.52220  |
| H | 5.20800  | -9.56140 | -8.28010  |
| H | 6.20980  | -8.14130 | -8.71860  |
| O | -6.95070 | -7.25130 | -7.17200  |

|   |          |          |           |
|---|----------|----------|-----------|
| O | -0.07350 | 2.35950  | -10.19330 |
| C | -0.00690 | 2.57400  | -11.59500 |
| H | 0.87340  | 2.08690  | -12.03290 |
| H | -0.91330 | 2.21630  | -12.09910 |
| H | 0.07580  | 3.65470  | -11.72650 |
| C | -7.53970 | -7.82990 | -8.32670  |
| H | -7.64830 | -7.09300 | -9.13240  |
| H | -6.95680 | -8.68620 | -8.68830  |
| H | -8.52840 | -8.17340 | -8.01560  |
| O | 1.76710  | -6.40110 | -9.53540  |
| O | -0.37370 | -2.42480 | -10.83020 |
| O | -2.94140 | -6.13910 | -9.63840  |
| C | -0.34040 | -2.27080 | -12.23680 |
| H | 0.59440  | -1.80040 | -12.57200 |
| H | -1.19160 | -1.67960 | -12.60210 |
| H | -0.40180 | -3.28030 | -12.64850 |
| C | 2.25600  | -7.08720 | -10.67280 |
| H | 1.56450  | -6.84920 | -11.48380 |
| H | 3.26500  | -6.75090 | -10.94870 |
| H | 2.26920  | -8.17470 | -10.51690 |
| C | -3.46000 | -6.73260 | -10.81390 |
| H | -2.68980 | -6.60350 | -11.57710 |
| H | -4.38350 | -6.23780 | -11.14500 |
| H | -3.65580 | -7.80510 | -10.67690 |
| C | -5.79820 | -5.93260 | -4.73800  |
| O | -5.21300 | -5.38970 | -3.81500  |
| N | -7.07590 | -6.45250 | -4.60760  |
| H | -7.51140 | -6.89850 | -5.41200  |
| N | -7.72340 | -6.39060 | -3.42520  |
| C | -0.15670 | 1.95030  | -7.22040  |
| O | -0.19980 | 1.65710  | -6.03620  |
| N | -0.03210 | 4.27860  | -6.78120  |
| H | -0.03190 | 3.44110  | -8.66430  |
| N | -0.06760 | 3.25910  | -7.66360  |
| C | 4.26190  | -6.62500 | -4.44230  |
| O | 3.71330  | -5.97730 | -3.56550  |
| N | 5.41020  | -7.36480 | -4.21510  |
| H | 5.82310  | -7.88420 | -4.98660  |
| N | 5.97330  | -7.39650 | -2.98950  |
| C | 7.03720  | -8.10550 | -2.85270  |
| C | 9.02610  | -8.36110 | 0.92100   |
| C | 9.52680  | -9.04820 | -0.19360  |
| C | 8.87850  | -8.96720 | -1.42330  |
| C | 7.71570  | -8.19740 | -1.56420  |
| C | 7.21190  | -7.50950 | -0.44090  |
| C | 7.85440  | -7.58960 | 0.77760   |
| H | 10.43020 | -9.64740 | -0.09600  |
| H | 9.27730  | -9.50350 | -2.28240  |
| H | 6.31110  | -6.91560 | -0.55670  |
| H | 7.47210  | -7.06000 | 1.64420   |

|   |           |          |          |
|---|-----------|----------|----------|
| C | -8.90340  | -6.89970 | -3.37360 |
| C | -11.13940 | -6.87350 | 0.26930  |
| C | -11.67930 | -7.44550 | -0.89120 |
| C | -10.95350 | -7.45220 | -2.07950 |
| C | -9.67210  | -6.88580 | -2.13280 |
| C | -9.13300  | -6.30650 | -0.96520 |
| C | -9.85200  | -6.30060 | 0.21250  |
| H | -12.67250 | -7.89000 | -0.86070 |
| H | -11.38180 | -7.90220 | -2.97340 |
| H | -8.14160  | -5.86800 | -1.01360 |
| H | -9.44050  | -5.85730 | 1.11350  |
| C | 0.05500   | 5.46780  | -7.26230 |
| C | 0.17290   | 8.88740  | -4.69560 |
| C | 0.24020   | 9.03820  | -6.08820 |
| C | 0.20150   | 7.92500  | -6.92350 |
| C | 0.09590   | 6.63450  | -6.38560 |
| C | 0.02920   | 6.48480  | -4.98470 |
| C | 0.06650   | 7.58880  | -4.15630 |
| H | 0.32260   | 10.03450 | -6.51910 |
| H | 0.25390   | 8.05680  | -8.00270 |
| H | -0.05260  | 5.48430  | -4.57230 |
| H | 0.01470   | 7.47630  | -3.07810 |
| H | 0.10120   | 5.65190  | -8.34640 |
| H | 7.47330   | -8.66390 | -3.69480 |
| H | -9.37230  | -7.36600 | -4.25320 |
| C | -1.18990  | 13.47440 | 4.56890  |
| C | 0.05830   | 13.42070 | 3.92770  |
| C | 1.24970   | 13.32580 | 4.67600  |
| C | 1.18430   | 13.27070 | 6.07940  |
| C | -0.06340  | 13.30970 | 6.73480  |
| C | -1.23920  | 13.41730 | 5.97480  |
| C | 0.32620   | 13.69310 | -0.37710 |
| C | 0.38450   | 14.84950 | 0.40680  |
| C | 0.30040   | 14.75840 | 1.79890  |
| C | 0.14940   | 13.50960 | 2.43390  |
| C | 0.10280   | 12.38320 | 1.62160  |
| C | 0.18590   | 12.42320 | 0.22000  |
| H | 0.49510   | 15.81540 | -0.06430 |
| H | -0.00790  | 11.40150 | 2.07140  |
| C | -5.00570  | 13.77700 | 8.06930  |
| C | -4.55660  | 12.49590 | 7.68630  |
| C | -3.33550  | 12.42730 | 6.99420  |
| C | -2.55730  | 13.53390 | 6.67920  |
| C | -3.04100  | 14.79650 | 7.07700  |
| C | -4.25360  | 14.91640 | 7.76330  |
| H | -2.99750  | 11.43540 | 6.71100  |
| H | -4.60940  | 15.89230 | 8.06070  |
| C | 4.83510   | 13.16760 | 8.39570  |
| C | 4.24830   | 14.39060 | 8.05640  |
| C | 3.06550   | 14.42140 | 7.31070  |

|   |          |          |          |
|---|----------|----------|----------|
| C | 2.44840  | 13.22610 | 6.88730  |
| C | 3.06020  | 12.03120 | 7.24720  |
| C | 4.24610  | 11.94990 | 7.99670  |
| H | 4.71070  | 15.31460 | 8.37200  |
| H | 2.61540  | 11.08880 | 6.94370  |
| C | -2.47670 | 13.63040 | 3.78490  |
| H | -2.91740 | 14.62080 | 3.96070  |
| H | -2.31550 | 13.52020 | 2.71110  |
| H | -3.22350 | 12.89110 | 4.09270  |
| C | -0.14970 | 13.28060 | 8.24650  |
| H | -0.95920 | 12.62990 | 8.58890  |
| H | 0.77940  | 12.92970 | 8.69670  |
| H | -0.35420 | 14.28460 | 8.64090  |
| C | 2.57850  | 13.31970 | 3.94910  |
| H | 3.40830  | 13.12670 | 4.62910  |
| H | 2.60040  | 12.55760 | 3.16300  |
| H | 2.75760  | 14.28750 | 3.46250  |
| O | -6.19750 | 13.87750 | 8.75010  |
| C | -6.65760 | 15.14970 | 9.18160  |
| H | -7.59750 | 14.96390 | 9.70510  |
| H | -5.94520 | 15.62070 | 9.87060  |
| H | -6.84260 | 15.81810 | 8.33130  |
| O | 6.00040  | 13.12110 | 9.12700  |
| O | 0.40460  | 13.76570 | -1.74940 |
| C | 0.53400  | 15.02960 | -2.38290 |
| H | -0.32510 | 15.67630 | -2.16480 |
| H | 1.45990  | 15.53560 | -2.08230 |
| H | 0.56750  | 14.82290 | -3.45440 |
| C | 6.62990  | 14.32780 | 9.53090  |
| H | 6.92220  | 14.93590 | 8.66570  |
| H | 5.98160  | 14.91690 | 10.19150 |
| H | 7.52480  | 14.02680 | 10.07920 |
| O | -2.25990 | 15.86610 | 6.75710  |
| O | 0.35760  | 15.84480 | 2.61920  |
| O | 2.44590  | 15.57920 | 6.95060  |
| C | 0.49220  | 17.13280 | 2.04720  |
| H | -0.35610 | 17.37770 | 1.39320  |
| H | 1.42600  | 17.22960 | 1.47620  |
| H | 0.51140  | 17.83100 | 2.88660  |
| C | -2.67820 | 17.16340 | 7.14010  |
| H | -1.90060 | 17.84330 | 6.78590  |
| H | -3.63550 | 17.43630 | 6.67490  |
| H | -2.76920 | 17.25560 | 8.23120  |
| C | 3.02060  | 16.81460 | 7.33460  |
| H | 2.36020  | 17.58730 | 6.93570  |
| H | 4.02590  | 16.94470 | 6.91060  |
| H | 3.07570  | 16.91580 | 8.42730  |
| C | 4.72280  | 10.54420 | 8.26870  |
| O | 4.11300  | 9.56880  | 7.86040  |
| N | 5.88870  | 10.44160 | 9.00890  |

|   |          |          |          |
|---|----------|----------|----------|
| H | 6.35150  | 11.29280 | 9.32000  |
| N | 6.40690  | 9.23350  | 9.31790  |
| C | 0.11460  | 11.07370 | -0.45110 |
| O | 0.00050  | 10.04190 | 0.19150  |
| N | 0.14160  | 9.94730  | -2.54590 |
| H | 0.28030  | 11.98790 | -2.30760 |
| N | 0.18840  | 11.09220 | -1.83340 |
| C | -5.21070 | 11.16050 | 7.93810  |
| O | -4.70890 | 10.11680 | 7.55200  |
| N | -6.40560 | 11.20270 | 8.63730  |
| H | -6.77460 | 12.10500 | 8.92970  |
| N | -7.06740 | 10.06480 | 8.93530  |
| C | -8.17030 | 10.18140 | 9.58720  |
| C | 7.49140  | 9.22840  | 10.00970 |
| C | 0.21260  | 10.05830 | -3.82560 |
| H | 0.30540  | 11.04040 | -4.31400 |
| H | 7.97150  | 10.16480 | 10.33260 |
| C | 9.37100  | -4.71320 | 12.65790 |
| C | 10.24870 | -4.10330 | 11.73480 |
| C | 10.64460 | -4.77750 | 10.57170 |
| C | 10.15610 | -6.08060 | 10.32740 |
| C | 9.28350  | -6.69900 | 11.23450 |
| C | 8.89360  | -6.00650 | 12.40280 |
| C | 11.86380 | -0.21280 | 12.71240 |
| C | 12.51390 | -1.37680 | 13.13660 |
| C | 11.99000 | -2.63230 | 12.81540 |
| C | 10.80570 | -2.74920 | 12.05900 |
| C | 10.18760 | -1.57160 | 11.65820 |
| C | 10.67480 | -0.28790 | 11.95720 |
| H | 13.42350 | -1.30490 | 13.71500 |
| H | 9.27320  | -1.61620 | 11.07510 |
| C | 6.40990  | -8.00340 | 15.32830 |
| C | 5.79220  | -7.22630 | 14.32730 |
| C | 6.63430  | -6.59820 | 13.39360 |
| C | 8.01970  | -6.70070 | 13.40650 |
| C | 8.59710  | -7.49480 | 14.41870 |
| C | 7.80100  | -8.13680 | 15.37150 |
| H | 6.14680  | -5.99750 | 12.63210 |
| H | 8.26090  | -8.73710 | 16.14310 |
| C | 11.60080 | -8.22830 | 6.86100  |
| C | 12.29100 | -8.29770 | 8.07520  |
| C | 11.81900 | -7.60070 | 9.19120  |
| C | 10.64560 | -6.82230 | 9.11780  |
| C | 9.99050  | -6.77630 | 7.89330  |
| C | 10.42540 | -7.45900 | 6.74390  |
| H | 13.19080 | -8.89100 | 8.15070  |
| H | 9.08230  | -6.19070 | 7.79180  |
| C | 8.99500  | -3.96930 | 13.92240 |
| H | 8.23440  | -4.50370 | 14.49180 |
| H | 9.87140  | -3.83520 | 14.56990 |



|   |          |           |          |
|---|----------|-----------|----------|
| H | 8.60930  | -2.96920  | 13.69750 |
| C | 8.78080  | -8.10970  | 11.00780 |
| H | 7.69500  | -8.17040  | 11.13550 |
| H | 9.02350  | -8.47170  | 10.00740 |
| H | 9.22740  | -8.80100  | 11.73470 |
| C | 11.61610 | -4.15340  | 9.59140  |
| H | 12.57220 | -4.69310  | 9.59710  |
| H | 11.23190 | -4.19730  | 8.56670  |
| H | 11.81880 | -3.10820  | 9.83070  |
| O | 5.60930  | -8.62520  | 16.25970 |
| C | 6.19860  | -9.39570  | 17.29630 |
| H | 5.36790  | -9.76680  | 17.89990 |
| H | 6.76160  | -10.24680 | 16.89310 |
| H | 6.85810  | -8.78360  | 17.92420 |
| O | 12.04900 | -8.90840  | 5.75140  |
| O | 12.36760 | 1.02950   | 13.02110 |
| C | 13.56330 | 1.13730   | 13.77890 |
| H | 13.45010 | 0.68580   | 14.77250 |
| H | 14.41030 | 0.67240   | 13.25910 |
| H | 13.75040 | 2.20740   | 13.88830 |
| C | 13.21770 | -9.70940  | 5.84020  |
| H | 14.09780 | -9.10710  | 6.09800  |
| H | 13.09600 | -10.51460 | 6.57550  |
| H | 13.35650 | -10.14430 | 4.84840  |
| O | 9.95600  | -7.58860  | 14.40480 |
| O | 12.57060 | -3.80150  | 13.20410 |
| O | 12.44660 | -7.62530  | 10.40000 |
| C | 13.76510 | -3.75790  | 13.96240 |
| H | 13.61940 | -3.24290  | 14.92190 |
| H | 14.57880 | -3.26760  | 13.41050 |
| H | 14.03540 | -4.79890  | 14.15110 |
| C | 10.60280 | -8.34550  | 15.41100 |
| H | 11.67170 | -8.26520  | 15.20300 |
| H | 10.39880 | -7.94580  | 16.41400 |
| H | 10.30760 | -9.40340  | 15.37880 |
| C | 13.61620 | -8.40760  | 10.55250 |
| H | 13.92620 | -8.27970  | 11.59160 |
| H | 14.42400 | -8.06630  | 9.89040  |
| H | 13.42060 | -9.47190  | 10.36220 |
| C | 9.55040  | -7.26580  | 5.53050  |
| O | 8.54640  | -6.57350  | 5.57000  |
| N | 9.96140  | -7.91990  | 4.38080  |
| H | 10.80750 | -8.48440  | 4.41200  |
| N | 9.26070  | -7.80200  | 3.23350  |
| C | 9.83580  | 0.84150   | 11.41490 |
| O | 8.82670  | 0.63470   | 10.76000 |
| N | 9.60320  | 3.20030   | 11.28310 |
| H | 11.13440 | 2.22870   | 12.26130 |
| N | 10.28470 | 2.11760   | 11.71240 |
| C | 4.32120  | -6.96770  | 14.11770 |

|   |           |          |          |
|---|-----------|----------|----------|
| O | 3.91860   | -6.26490 | 13.20510 |
| N | 3.46930   | -7.57890 | 15.02170 |
| H | 3.86730   | -8.15190 | 15.76260 |
| N | 2.13190   | -7.43070 | 14.91870 |
| C | 1.41270   | -8.03790 | 15.79470 |
| C | 9.70890   | -8.43620 | 2.20840  |
| C | 10.07780  | 4.35250  | 11.60060 |
| C | 8.14240   | 7.98330  | 10.40620 |
| C | 7.60620   | 6.72990  | 10.04310 |
| C | 8.22920   | 5.55710  | 10.42610 |
| C | 9.41560   | 5.58640  | 11.18910 |
| C | 9.95050   | 6.83200  | 11.55010 |
| C | 9.32260   | 8.01350  | 11.16420 |
| H | 6.69310   | 6.70590  | 9.45720  |
| H | 7.81490   | 4.59360  | 10.14650 |
| H | 10.86530  | 6.87470  | 12.13880 |
| H | 9.75210   | 8.97080  | 11.45460 |
| H | 10.99860  | 4.45420  | 12.19500 |
| C | -12.77180 | -3.41170 | 9.92940  |
| C | -12.36950 | -2.80620 | 11.12880 |
| C | -11.63850 | -3.53520 | 12.09340 |
| C | -11.31450 | -4.87780 | 11.84510 |
| C | -11.71980 | -5.50250 | 10.64340 |
| C | -12.44430 | -4.76600 | 9.69440  |
| C | -13.59440 | 1.24210  | 12.04080 |
| C | -14.39670 | 0.15850  | 12.41060 |
| C | -13.99250 | -1.14670 | 12.11700 |
| C | -12.77920 | -1.39600 | 11.44240 |
| C | -12.00740 | -0.29300 | 11.09720 |
| C | -12.36980 | 1.03710  | 11.37230 |
| H | -15.33080 | 0.33170  | 12.92500 |
| H | -11.06650 | -0.43770 | 10.57570 |
| C | -13.97640 | -6.58420 | 6.08030  |
| C | -12.68850 | -6.01110 | 6.06070  |
| C | -12.22280 | -5.44280 | 7.25880  |
| C | -12.95370 | -5.41540 | 8.44040  |
| C | -14.23930 | -5.99560 | 8.41590  |
| C | -14.74350 | -6.57750 | 7.24920  |
| H | -11.23030 | -5.00410 | 7.23090  |
| H | -15.72940 | -7.01960 | 7.25000  |
| C | -9.25840  | -7.16010 | 14.89990 |
| C | -10.65620 | -7.11480 | 14.86840 |
| C | -11.31510 | -6.38670 | 13.87300 |
| C | -10.59160 | -5.68380 | 12.88700 |
| C | -9.20530  | -5.76010 | 12.94840 |
| C | -8.49780  | -6.47830 | 13.92870 |
| H | -11.22900 | -7.64330 | 15.61660 |
| H | -8.60410  | -5.23210 | 12.21580 |
| C | -13.58740 | -2.65400 | 8.90140  |
| H | -13.15430 | -2.74840 | 7.90010  |

|   |           |          |          |
|---|-----------|----------|----------|
| H | -14.60880 | -3.05310 | 8.84650  |
| H | -13.65520 | -1.59140 | 9.14020  |
| C | -11.39540 | -6.96560 | 10.42270 |
| H | -11.65040 | -7.28970 | 9.41210  |
| H | -10.33080 | -7.16610 | 10.58410 |
| H | -11.95010 | -7.59580 | 11.13030 |
| C | -11.25670 | -2.85770 | 13.39360 |
| H | -10.59220 | -3.48020 | 13.99310 |
| H | -10.75430 | -1.90150 | 13.21330 |
| H | -12.15030 | -2.64040 | 13.99350 |
| O | -14.45750 | -7.14970 | 4.92130  |
| C | -15.74650 | -7.74470 | 4.90930  |
| H | -15.89130 | -8.11980 | 3.89430  |
| H | -15.80750 | -8.58090 | 5.61710  |
| H | -16.52920 | -7.01090 | 5.13980  |
| O | -8.59260  | -7.86600 | 15.87540 |
| O | -13.98060 | 2.53330  | 12.31920 |
| C | -15.22680 | 2.77720  | 12.95360 |
| H | -16.06310 | 2.40000  | 12.35170 |
| H | -15.26280 | 2.32800  | 13.95400 |
| H | -15.30750 | 3.86230  | 13.04350 |
| C | -9.33010  | -8.52970 | 16.89100 |
| H | -9.93490  | -7.82300 | 17.47290 |
| H | -9.97870  | -9.30880 | 16.47110 |
| H | -8.58730  | -8.99240 | 17.54370 |
| O | -14.94210 | -5.94450 | 9.58220  |
| O | -14.72860 | -2.24270 | 12.45400 |
| O | -12.67250 | -6.30270 | 13.79300 |
| C | -15.96920 | -2.06230 | 13.11140 |
| H | -16.67320 | -1.48280 | 12.49830 |
| H | -15.84690 | -1.56620 | 14.08410 |
| H | -16.37130 | -3.06520 | 13.26870 |
| C | -16.23760 | -6.51300 | 9.63000  |
| H | -16.59480 | -6.35420 | 10.64960 |
| H | -16.92400 | -6.02200 | 8.92630  |
| H | -16.21620 | -7.59110 | 9.41850  |
| C | -13.46230 | -6.94720 | 14.77500 |
| H | -14.49940 | -6.72610 | 14.51420 |
| H | -13.25250 | -6.56110 | 15.78200 |
| H | -13.31300 | -8.03570 | 14.76840 |
| C | -6.99660  | -6.40000 | 13.80030 |
| O | -6.46470  | -5.76270 | 12.90600 |
| N | -6.26990  | -7.09120 | 14.75610 |
| H | -6.76950  | -7.60620 | 15.47800 |
| N | -4.92020  | -7.08660 | 14.72720 |
| C | -11.38050 | 2.07050  | 10.89400 |
| O | -10.35500 | 1.75670  | 10.31080 |
| N | -10.90720 | 4.39610  | 10.77520 |
| H | -12.58510 | 3.58440  | 11.65310 |
| N | -11.71610 | 3.38710  | 11.16190 |

|   |           |          |          |
|---|-----------|----------|----------|
| C | -11.72420 | -5.91550 | 4.90480  |
| O | -10.61820 | -5.41600 | 5.03360  |
| N | -12.17950 | -6.42010 | 3.69830  |
| H | -13.10840 | -6.83390 | 3.65780  |
| N | -11.40420 | -6.37450 | 2.59410  |
| C | -11.89660 | -6.87480 | 1.51640  |
| C | -4.31320  | -7.75440 | 15.64320 |
| C | -0.04220  | -7.95270 | 15.76360 |
| C | -0.81430  | -8.63000 | 16.71820 |
| C | -2.20460  | -8.56210 | 16.68200 |
| C | -2.85520  | -7.81530 | 15.68980 |
| C | -2.07710  | -7.12980 | 14.73370 |
| C | -0.69880  | -7.19700 | 14.76980 |
| H | -0.32170  | -9.21670 | 17.49160 |
| H | -2.79200  | -9.09560 | 17.42700 |
| H | -2.58500  | -6.55210 | 13.96820 |
| H | -0.09780  | -6.67340 | 14.03330 |
| C | -11.28650 | 5.59090  | 11.06320 |
| C | -8.95930  | 9.01040  | 9.96220  |
| C | -10.16610 | 9.16100  | 10.66140 |
| C | -10.92150 | 8.04710  | 11.01930 |
| C | -10.48870 | 6.75470  | 10.68790 |
| C | -9.27400  | 6.60510  | 9.98670  |
| C | -8.52520  | 7.70980  | 9.63100  |
| H | -10.51530 | 10.15770 | 10.92540 |
| H | -11.85650 | 8.18000  | 11.56070 |
| H | -8.94040  | 5.60420  | 9.73210  |
| H | -7.59070  | 7.59650  | 9.09110  |
| H | -12.22660 | 5.78370  | 11.60240 |
| H | -4.86560  | -8.30650 | 16.41880 |
| H | 1.86440   | -8.64690 | 16.59240 |
| H | -8.56150  | 11.16520 | 9.88820  |
| H | -12.90160 | -7.32320 | 1.49420  |
| H | 10.62050  | -9.05030 | 2.26120  |

**Model of the biphenyl-linked molecular cage 11** (with the  $-(\text{CH}_2)_4(\text{OCH}_2\text{CH}_2)_3\text{OCH}_3$  substituents replaced by methyl groups)

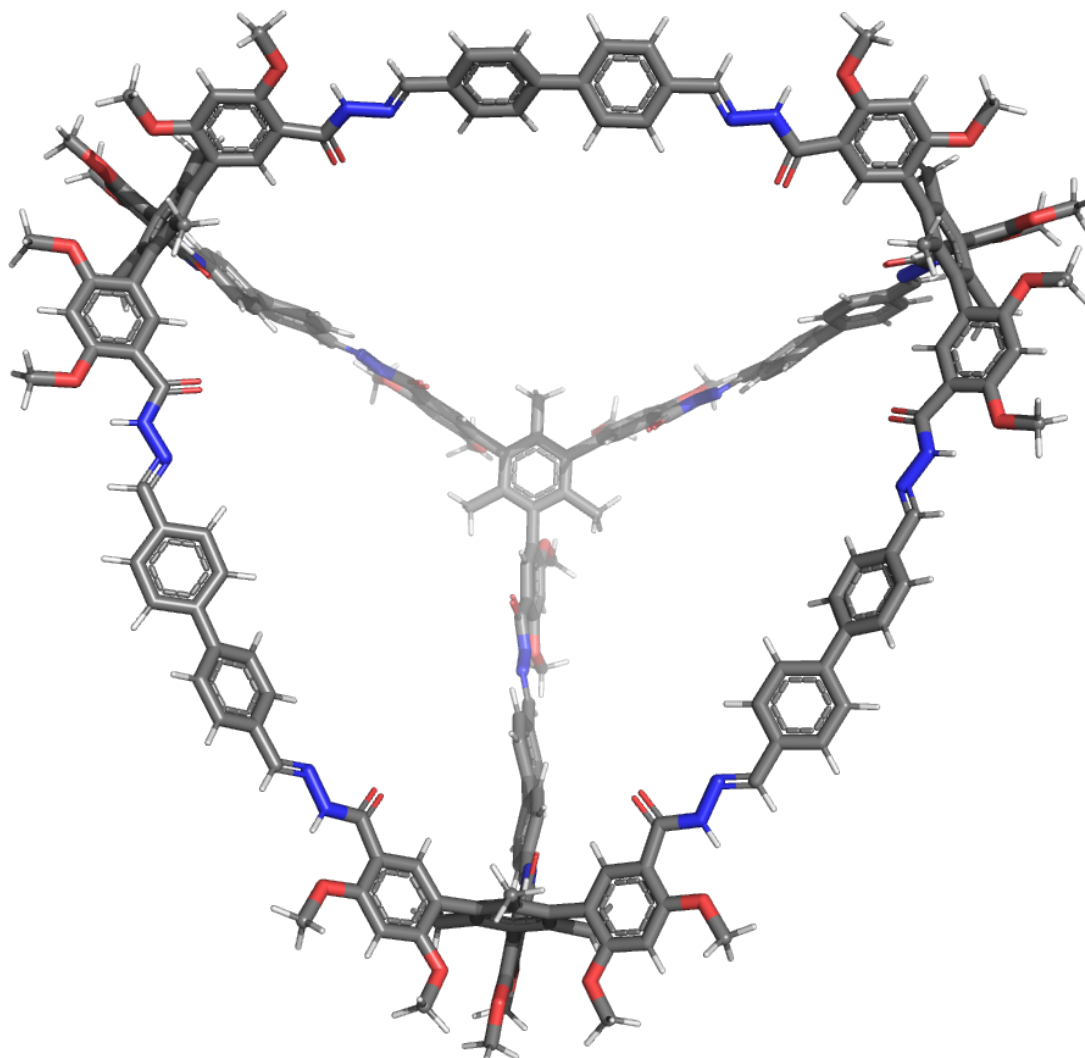

|   |          |          |           |
|---|----------|----------|-----------|
| C | 0.73480  | -4.50800 | -10.53920 |
| C | -0.43510 | -3.77710 | -10.78220 |
| C | -1.70620 | -4.36440 | -10.59040 |
| C | -1.79090 | -5.69790 | -10.16890 |
| C | -0.62040 | -6.45020 | -9.92260  |
| C | 0.63260  | -5.84910 | -10.10360 |
| C | -0.22190 | 0.27350  | -12.27110 |
| C | -0.43740 | -0.79000 | -13.15190 |
| C | -0.50510 | -2.09920 | -12.66840 |
| C | -0.35800 | -2.37090 | -11.29290 |
| C | -0.14360 | -1.28800 | -10.44990 |
| C | -0.06500 | 0.04350  | -10.88820 |
| H | -0.55180 | -0.59940 | -14.20920 |

|   |          |           |           |
|---|----------|-----------|-----------|
| H | -0.02340 | -1.45360  | -9.38390  |
| C | 4.27500  | -8.06600  | -9.40340  |
| C | 3.58820  | -7.50750  | -8.30640  |
| C | 2.40650  | -6.80260  | -8.58370  |
| C | 1.89000  | -6.62660  | -9.86140  |
| C | 2.60310  | -7.20450  | -10.93100 |
| C | 3.78230  | -7.91980  | -10.70360 |
| H | 1.88260  | -6.38080  | -7.73190  |
| H | 4.31510  | -8.35860  | -11.53480 |
| C | -5.65250 | -7.60680  | -9.79910  |
| C | -4.89070 | -7.77300  | -10.95930 |
| C | -3.64010 | -7.16020  | -11.07120 |
| C | -3.12700 | -6.36380  | -10.02670 |
| C | -3.91270 | -6.22500  | -8.88920  |
| C | -5.17450 | -6.82230  | -8.72960  |
| H | -5.26970 | -8.37650  | -11.77140 |
| H | -3.55780 | -5.61700  | -8.06310  |
| C | 2.10680  | -3.90250  | -10.75600 |
| H | 2.75070  | -4.05800  | -9.88370  |
| H | 2.60560  | -4.37480  | -11.61200 |
| H | 2.05460  | -2.83000  | -10.94890 |
| C | -0.75070 | -7.89700  | -9.49540  |
| H | 0.21550  | -8.32980  | -9.23690  |
| H | -1.41130 | -7.99810  | -8.62730  |
| H | -1.18580 | -8.49980  | -10.30260 |
| C | -2.94770 | -3.54580  | -10.87450 |
| H | -3.85030 | -4.04970  | -10.53010 |
| H | -2.89790 | -2.56620  | -10.38770 |
| H | -3.05320 | -3.36570  | -11.95140 |
| O | 5.43620  | -8.76160  | -9.15760  |
| C | 6.15160  | -9.34210  | -10.23790 |
| H | 7.01860  | -9.83220  | -9.79070  |
| H | 5.54410  | -10.08960 | -10.76290 |
| H | 6.49200  | -8.58010  | -10.95040 |
| O | -6.88800 | -8.19860  | -9.67300  |
| O | -0.15410 | 1.56840   | -12.73190 |
| C | -0.34490 | 1.83870   | -14.11270 |
| H | 0.42800  | 1.35810   | -14.72510 |
| H | -1.33680 | 1.51390   | -14.45110 |
| H | -0.26450 | 2.92250   | -14.21700 |
| C | -7.41590 | -8.96670  | -10.74390 |
| H | -7.53450 | -8.35950  | -11.64990 |
| H | -6.78400 | -9.83610  | -10.96450 |
| H | -8.39660 | -9.30940  | -10.40800 |
| O | 2.07730  | -7.01750  | -12.17400 |
| O | -0.71790 | -3.17630  | -13.47490 |
| O | -2.84820 | -7.28890  | -12.17220 |
| C | -0.86010 | -2.97520  | -14.86940 |
| H | 0.04180  | -2.52680  | -15.30840 |
| H | -1.72710 | -2.34230  | -15.10310 |

|   |           |          |           |
|---|-----------|----------|-----------|
| H | -1.01400  | -3.96720 | -15.29870 |
| C | 2.73400   | -7.58520 | -13.29270 |
| H | 2.13200   | -7.31110 | -14.16150 |
| H | 3.74920   | -7.18370 | -13.41600 |
| H | 2.78620   | -8.68020 | -13.21970 |
| C | -3.30830  | -8.06190 | -13.26560 |
| H | -2.51580  | -8.01740 | -14.01540 |
| H | -4.23360  | -7.65080 | -13.69210 |
| H | -3.47740  | -9.10950 | -12.98120 |
| C | -5.84910  | -6.52130 | -7.41500  |
| O | -5.37040  | -5.73380 | -6.61460  |
| N | -7.02470  | -7.21010 | -7.17520  |
| H | -7.37490  | -7.84550 | -7.88890  |
| N | -7.69880  | -7.05160 | -6.01530  |
| C | 0.17100   | 1.04990  | -9.79120  |
| O | 0.34220   | 0.71040  | -8.63060  |
| N | 0.27770   | 3.36910  | -9.28620  |
| H | 0.00660   | 2.58900  | -11.17370 |
| N | 0.16270   | 2.37370  | -10.19140 |
| C | 3.95360   | -7.56230 | -6.84530  |
| O | 3.18590   | -7.18000 | -5.97680  |
| N | 5.22190   | -8.03730 | -6.56790  |
| H | 5.80490   | -8.36030 | -7.33740  |
| N | 5.68690   | -8.08360 | -5.29990  |
| C | 6.88780   | -8.51650 | -5.15210  |
| C | 8.82520   | -8.69450 | -1.33450  |
| C | 9.49510   | -9.07360 | -2.50770  |
| C | 8.85350   | -9.02420 | -3.73950  |
| C | 7.52340   | -8.59170 | -3.84220  |
| C | 6.84190   | -8.22250 | -2.66970  |
| C | 7.48400   | -8.27650 | -1.44410  |
| H | 10.53720  | -9.37740 | -2.45950  |
| H | 9.39500   | -9.30660 | -4.63950  |
| H | 5.80870   | -7.89820 | -2.74360  |
| H | 6.93380   | -8.01200 | -0.54610  |
| C | -8.76250  | -7.75800 | -5.86800  |
| C | -11.04440 | -7.65550 | -2.23890  |
| C | -11.39400 | -8.52040 | -3.28710  |
| C | -10.66240 | -8.53650 | -4.47110  |
| C | -9.55550  | -7.69240 | -4.64480  |
| C | -9.21580  | -6.80570 | -3.60840  |
| C | -9.94950  | -6.78960 | -2.43560  |
| H | -12.22210 | -9.21310 | -3.16080  |
| H | -10.93740 | -9.23050 | -5.26350  |
| H | -8.37000  | -6.13930 | -3.74480  |
| H | -9.68490  | -6.08120 | -1.65650  |
| C | 0.18490   | 4.56960  | -9.73640  |
| C | 0.23700   | 7.97810  | -7.13050  |
| C | 0.02360   | 8.12340  | -8.51040  |
| C | 0.03190   | 7.01670  | -9.35380  |

|   |          |          |           |
|---|----------|----------|-----------|
| C | 0.24660  | 5.72590  | -8.84740  |
| C | 0.48550  | 5.57600  | -7.47020  |
| C | 0.48420  | 6.68100  | -6.63660  |
| H | -0.18820 | 9.10620  | -8.92310  |
| H | -0.15710 | 7.15110  | -10.41740 |
| H | 0.66740  | 4.58160  | -7.07480  |
| H | 0.69430  | 6.54530  | -5.58010  |
| H | 0.02400  | 4.77310  | -10.80600 |
| H | 7.49420  | -8.83310 | -6.01430  |
| H | -9.10420 | -8.45550 | -6.64760  |
| C | -1.36690 | 16.07730 | 4.90470   |
| C | -0.15470 | 15.83030 | 4.24440   |
| C | 1.02640  | 15.57480 | 4.97220   |
| C | 0.98320  | 15.55820 | 6.37740   |
| C | -0.23320 | 15.78940 | 7.05470   |
| C | -1.39640 | 16.05550 | 6.31410   |
| C | 0.18720  | 16.02720 | -0.05760  |
| C | 0.40330  | 17.16830 | 0.72000   |
| C | 0.28010  | 17.10290 | 2.11000   |
| C | -0.07130 | 15.89680 | 2.74920   |
| C | -0.28630 | 14.78640 | 1.94210   |
| C | -0.16640 | 14.79990 | 0.54260   |
| H | 0.66950  | 18.10190 | 0.24560   |
| H | -0.55700 | 13.83810 | 2.39570   |
| C | -5.11080 | 16.92420 | 8.35850   |
| C | -4.69840 | 15.58440 | 8.21480   |
| C | -3.48530 | 15.35330 | 7.54640   |
| C | -2.67920 | 16.35860 | 7.02870   |
| C | -3.11900 | 17.68680 | 7.20360   |
| C | -4.32210 | 17.96610 | 7.86020   |
| H | -3.18220 | 14.31650 | 7.43990   |
| H | -4.64330 | 18.99050 | 7.98090   |
| C | 4.71200  | 15.14290 | 8.52290   |
| C | 4.11420  | 16.39700 | 8.37300   |
| C | 2.89910  | 16.51990 | 7.69550   |
| C | 2.25530  | 15.38800 | 7.15370   |
| C | 2.87850  | 14.15670 | 7.32860   |
| C | 4.10050  | 13.98180 | 8.00040   |
| H | 4.59540  | 17.27480 | 8.77910   |
| H | 2.42070  | 13.26160 | 6.91910   |
| C | -2.62830 | 16.39880 | 4.13130   |
| H | -2.85470 | 17.47140 | 4.19410   |
| H | -2.53280 | 16.13930 | 3.07540   |
| H | -3.49180 | 15.86220 | 4.53680   |
| C | -0.28710 | 15.79130 | 8.56810   |
| H | -1.14280 | 15.22220 | 8.94200   |
| H | 0.61710  | 15.35980 | 8.99960   |
| H | -0.38770 | 16.81410 | 8.95260   |
| C | 2.32210  | 15.36920 | 4.21350   |
| H | 3.15430  | 15.14850 | 4.88060   |



|   |           |          |          |
|---|-----------|----------|----------|
| H | 2.23790   | 14.54660 | 3.49480  |
| H | 2.57940   | 16.26780 | 3.64000  |
| O | -6.29980  | 17.17420 | 9.00280  |
| C | -6.74440  | 18.51370 | 9.16110  |
| H | -7.69560  | 18.45030 | 9.69290  |
| H | -6.03510  | 19.10170 | 9.75640  |
| H | -6.90180  | 19.00100 | 8.19070  |
| O | 5.91520   | 15.01630 | 9.18040  |
| O | 0.31140   | 16.07530 | -1.42790 |
| C | 0.72230   | 17.27910 | -2.05920 |
| H | -0.00320  | 18.08500 | -1.89380 |
| H | 1.71230   | 17.59790 | -1.70950 |
| H | 0.77100   | 17.05310 | -3.12620 |
| C | 6.57000   | 16.16780 | 9.69180  |
| H | 6.81470   | 16.87680 | 8.89120  |
| H | 5.96180   | 16.67020 | 10.45430 |
| H | 7.49350   | 15.80580 | 10.14800 |
| O | -2.31120  | 18.65890 | 6.69430  |
| O | 0.49790   | 18.17320 | 2.92460  |
| O | 2.27180   | 17.71440 | 7.51250  |
| C | 0.87320   | 19.41130 | 2.34870  |
| H | 0.09580   | 19.79960 | 1.67630  |
| H | 1.81990   | 19.33300 | 1.79660  |
| H | 1.00220   | 20.10160 | 3.18490  |
| C | -2.68270  | 20.01640 | 6.85010  |
| H | -1.88890  | 20.59820 | 6.37700  |
| H | -3.63690  | 20.23730 | 6.35240  |
| H | -2.75540  | 20.29810 | 7.90960  |
| C | 2.87210   | 18.89300 | 8.01770  |
| H | 2.19800   | 19.70890 | 7.74880  |
| H | 3.85670   | 19.07380 | 7.56460  |
| H | 2.97970   | 18.85920 | 9.11060  |
| C | 4.60020   | 12.55350 | 8.05080  |
| O | 4.01690   | 11.64210 | 7.48480  |
| N | 5.75000   | 12.37970 | 8.79390  |
| H | 6.16520   | 13.20270 | 9.22450  |
| N | 6.33780   | 11.17340 | 8.98870  |
| C | -0.41080  | 13.46640 | -0.12330 |
| O | -0.80550  | 12.49390 | 0.50080  |
| N | -0.21320  | 12.29820 | -2.20220 |
| H | 0.18910   | 14.29330 | -1.92120 |
| N | -0.12190  | 13.43380 | -1.47380 |
| C | -5.39380  | 14.33900 | 8.69150  |
| O | -4.86990  | 13.23920 | 8.60630  |
| N | -6.66840  | 14.51760 | 9.20690  |
| H | -7.06220  | 15.45470 | 9.25590  |
| N | -7.38190  | 13.44220 | 9.59100  |
| C | -8.58370  | 13.61670 | 10.01050 |
| C | -10.94460 | 10.15780 | 10.97270 |
| C | -11.50580 | 11.44430 | 11.04350 |

|   |           |          |          |
|---|-----------|----------|----------|
| C | -10.73810 | 12.57390 | 10.75720 |
| C | -9.38860  | 12.45540 | 10.39090 |
| C | -8.81580  | 11.17140 | 10.35600 |
| C | -9.57740  | 10.05520 | 10.64390 |
| H | -12.55940 | 11.56110 | 11.28330 |
| H | -11.20140 | 13.55850 | 10.79310 |
| H | -7.76790  | 11.07540 | 10.09220 |
| H | -9.10500  | 9.07800  | 10.63060 |
| C | 7.38270   | 11.21400 | 9.73980  |
| C | 9.70400   | 7.85140  | 11.04350 |
| C | 9.97760   | 9.15450  | 11.48640 |
| C | 9.22450   | 10.23010 | 11.03310 |
| C | 8.16680   | 10.04820 | 10.12660 |
| C | 7.90220   | 8.75060  | 9.65870  |
| C | 8.66110   | 7.68070  | 10.10880 |
| H | 10.76020  | 9.32180  | 12.22160 |
| H | 9.43930   | 11.22980 | 11.40600 |
| H | 7.09840   | 8.59970  | 8.94450  |
| H | 8.45490   | 6.68840  | 9.71920  |
| C | 0.12390   | 12.40900 | -3.43880 |
| C | 0.18720   | 9.12810  | -6.20090 |
| C | -0.25930  | 8.94860  | -4.87500 |
| C | -0.29210  | 9.99730  | -3.97090 |
| C | 0.11680   | 11.28250 | -4.36420 |
| C | 0.54630   | 11.47430 | -5.68700 |
| C | 0.58330   | 10.41710 | -6.58930 |
| H | -0.60630  | 7.96970  | -4.55880 |
| H | -0.63770  | 9.84330  | -2.95330 |
| H | 0.87270   | 12.46280 | -6.00530 |
| H | 0.95430   | 10.58720 | -7.59650 |
| H | 0.45590   | 13.37370 | -3.85210 |
| H | -9.04870  | 14.61190 | 10.06990 |
| H | 7.72730   | 12.17050 | 10.16260 |
| C | 11.87770  | -5.76930 | 14.37110 |
| C | 12.73110  | -5.18610 | 13.40990 |
| C | 13.02530  | -5.85560 | 12.21310 |
| C | 12.45780  | -7.12500 | 11.97690 |
| C | 11.61490  | -7.72410 | 12.92510 |
| C | 11.32660  | -7.03650 | 14.12510 |
| C | 14.44220  | -1.29430 | 14.19970 |
| C | 15.18390  | -2.45160 | 14.46000 |
| C | 14.63320  | -3.71360 | 14.20910 |
| C | 13.32880  | -3.84080 | 13.69050 |
| C | 12.62000  | -2.66970 | 13.45750 |
| C | 13.12990  | -1.38360 | 13.69270 |
| H | 16.18660  | -2.37100 | 14.85460 |
| H | 11.61020  | -2.72470 | 13.06320 |
| C | 8.79850   | -8.92780 | 17.08370 |
| C | 8.20360   | -8.33040 | 15.95380 |
| C | 9.06510   | -7.73020 | 15.02010 |

|   |          |           |          |
|---|----------|-----------|----------|
| C | 10.44820 | -7.69130  | 15.14960 |
| C | 11.00550 | -8.30580  | 16.29030 |
| C | 10.18800 | -8.91660  | 17.24690 |
| H | 8.59460  | -7.26970  | 14.15710 |
| H | 10.63160 | -9.38160  | 18.11540 |
| C | 13.48040 | -9.08910  | 8.27380  |
| C | 14.19140 | -9.38170  | 9.44110  |
| C | 13.85510 | -8.75330  | 10.64300 |
| C | 12.79570 | -7.82720  | 10.69920 |
| C | 12.11430 | -7.56050  | 9.51900  |
| C | 12.41680 | -8.16070  | 8.28800  |
| H | 15.00510 | -10.09190 | 9.41330  |
| H | 11.29780 | -6.84510  | 9.52080  |
| C | 11.59310 | -5.02790  | 15.66070 |
| H | 10.81380 | -5.52160  | 16.24200 |
| H | 12.49490 | -4.96850  | 16.28390 |
| H | 11.26950 | -4.00000  | 15.46940 |
| C | 11.03210 | -9.10390  | 12.69430 |
| H | 9.93660  | -9.08340  | 12.69570 |
| H | 11.35490 | -9.52390  | 11.74010 |
| H | 11.33560 | -9.79470  | 13.49080 |
| C | 13.95800 | -5.25110  | 11.18390 |
| H | 14.87490 | -5.84740  | 11.09060 |
| H | 13.49640 | -5.22100  | 10.19160 |
| H | 14.24350 | -4.23340  | 11.45160 |
| O | 7.97830  | -9.52320  | 18.01330 |
| C | 8.54420  | -10.14170 | 19.15910 |
| H | 7.70140  | -10.53600 | 19.73030 |
| H | 9.21000  | -10.96720 | 18.87890 |
| H | 9.09430  | -9.41910  | 19.77490 |
| O | 13.80580 | -9.69620  | 7.08170  |
| O | 14.96500 | -0.04370  | 14.43370 |
| C | 16.27900 | 0.08290   | 14.95710 |
| H | 16.36290 | -0.39160  | 15.94260 |
| H | 17.02530 | -0.34770  | 14.27770 |
| H | 16.45700 | 1.15540   | 15.05700 |
| C | 14.87710 | -10.62700 | 7.03050  |
| H | 15.82710 | -10.15820 | 7.31520  |
| H | 14.68710 | -11.49350 | 7.67630  |
| H | 14.93500 | -10.95660 | 5.99130  |
| O | 12.36200 | -8.25850  | 16.39390 |
| O | 15.30480 | -4.87620  | 14.43560 |
| O | 14.51150 | -8.98550  | 11.81360 |
| C | 16.62790 | -4.81970  | 14.93710 |
| H | 16.66820 | -4.33800  | 15.92380 |
| H | 17.30030 | -4.28870  | 14.24940 |
| H | 16.95530 | -5.85720  | 15.03020 |
| C | 12.98790 | -8.84520  | 17.52040 |
| H | 14.05860 | -8.67930  | 17.38510 |
| H | 12.66400 | -8.37190  | 18.45730 |

|   |          |           |          |
|---|----------|-----------|----------|
| H | 12.79350 | -9.92510  | 17.57630 |
| C | 15.57600 | -9.91890  | 11.83220 |
| H | 15.93370 | -9.94150  | 12.86360 |
| H | 16.39820 | -9.61160  | 11.17110 |
| H | 15.23960 | -10.92450 | 11.54460 |
| C | 11.54930 | -7.70490  | 7.13900  |
| O | 10.72670 | -6.81060  | 7.26080  |
| N | 11.75490 | -8.39340  | 5.96220  |
| H | 12.46680 | -9.12050  | 5.94990  |
| N | 11.05930 | -8.12990  | 4.83230  |
| C | 12.18190 | -0.26640  | 13.34890 |
| O | 11.01770 | -0.47910  | 13.04770 |
| N | 11.98670 | 2.06370   | 12.98090 |
| H | 13.70430 | 1.12380   | 13.62790 |
| N | 12.72860 | 1.00520   | 13.36380 |
| C | 6.73960  | -8.24450  | 15.60110 |
| O | 6.36540  | -7.80890  | 14.52390 |
| N | 5.85940  | -8.66360  | 16.58370 |
| H | 6.23520  | -9.03170  | 17.45500 |
| N | 4.52340  | -8.58750  | 16.39490 |
| C | 3.77880  | -8.96990  | 17.37060 |
| C | -0.50080 | -8.71110  | 17.18400 |
| C | 0.14670  | -9.17000  | 18.34140 |
| C | 1.53430  | -9.26680  | 18.39120 |
| C | 2.32250  | -8.90490  | 17.28820 |
| C | 1.67870  | -8.46260  | 16.11920 |
| C | 0.29840  | -8.37260  | 16.07320 |
| H | -0.43810 | -9.41990  | 19.22270 |
| H | 2.01640  | -9.60750  | 19.30590 |
| H | 2.28240  | -8.19460  | 15.25780 |
| H | -0.17900 | -8.05200  | 15.15220 |
| C | 11.35640 | -8.88490  | 3.83410  |
| C | 9.49470  | -8.72240  | -0.01770 |
| C | 10.46900 | -9.68500  | 0.28650  |
| C | 11.07040 | -9.71230  | 1.53760  |
| C | 10.71770 | -8.78440  | 2.53010  |
| C | 9.75330  | -7.80840  | 2.22920  |
| C | 9.15910  | -7.78250  | 0.97750  |
| H | 10.73150 | -10.43870 | -0.45090 |
| H | 11.81230 | -10.47650 | 1.76200  |
| H | 9.48540  | -7.07920  | 2.98770  |
| H | 8.43370  | -7.00630  | 0.75260  |
| C | 12.56260 | 3.21190   | 12.95200 |
| C | 10.45270 | 6.68220   | 11.55670 |
| C | 9.80870  | 5.43500   | 11.68410 |
| C | 10.48080 | 4.31690   | 12.14540 |
| C | 11.83740 | 4.39860   | 12.50750 |
| C | 12.48210 | 5.64030   | 12.40400 |
| C | 11.80260 | 6.76170   | 11.93500 |
| H | 8.75480  | 5.35210   | 11.43640 |

|   |           |          |          |
|---|-----------|----------|----------|
| H | 9.97320   | 3.36190  | 12.23460 |
| H | 13.53320  | 5.72490  | 12.67470 |
| H | 12.33640  | 7.70280  | 11.83150 |
| H | 13.61830  | 3.34100  | 13.23190 |
| H | 4.20840   | -9.34340 | 18.31240 |
| H | 12.11790  | -9.67380 | 3.93270  |
| C | -14.75480 | -3.81720 | 11.12550 |
| C | -14.35970 | -3.18400 | 12.31200 |
| C | -13.58150 | -3.87300 | 13.26940 |
| C | -13.20710 | -5.20270 | 13.02750 |
| C | -13.59760 | -5.85470 | 11.83660 |
| C | -14.37270 | -5.15940 | 10.89680 |
| C | -15.70140 | 0.82470  | 13.23100 |
| C | -16.37010 | -0.28480 | 13.75670 |
| C | -15.93490 | -1.57840 | 13.45640 |
| C | -14.81920 | -1.78950 | 12.61950 |
| C | -14.18240 | -0.66160 | 12.11380 |
| C | -14.58330 | 0.65750  | 12.38610 |
| H | -17.22680 | -0.14080 | 14.39910 |
| H | -13.32070 | -0.77920 | 11.46410 |
| C | -15.87130 | -7.09330 | 7.33140  |
| C | -14.54100 | -6.62650 | 7.34550  |
| C | -14.09000 | -6.01510 | 8.52710  |
| C | -14.87430 | -5.84810 | 9.66240  |
| C | -16.19490 | -6.34100 | 9.61100  |
| C | -16.68730 | -6.95810 | 8.45800  |
| H | -13.06510 | -5.65750 | 8.52700  |
| H | -17.70180 | -7.32930 | 8.43650  |
| C | -11.10830 | -7.49050 | 16.03840 |
| C | -12.50170 | -7.55090 | 15.94370 |
| C | -13.17100 | -6.80650 | 14.96930 |
| C | -12.46180 | -5.98220 | 14.07070 |
| C | -11.07850 | -5.94330 | 14.20160 |
| C | -10.36080 | -6.67550 | 15.16320 |
| H | -13.06230 | -8.17450 | 16.62500 |
| H | -10.49390 | -5.31650 | 13.53540 |
| C | -15.61570 | -3.10560 | 10.10160 |
| H | -15.23080 | -3.25450 | 9.08760  |
| H | -16.64030 | -3.49920 | 10.11870 |
| H | -15.66870 | -2.03220 | 10.28840 |
| C | -13.20840 | -7.30340 | 11.62470 |
| H | -13.43150 | -7.64270 | 10.61240 |
| H | -12.13940 | -7.45720 | 11.80600 |
| H | -13.74930 | -7.95440 | 12.32410 |
| C | -13.20240 | -3.17300 | 14.55720 |
| H | -12.43130 | -3.71990 | 15.09970 |
| H | -12.83200 | -2.16090 | 14.36620 |
| H | -14.07480 | -3.07880 | 15.21720 |
| O | -16.34100 | -7.68930 | 6.18310  |
| C | -17.68520 | -8.14330 | 6.12420  |

|   |           |          |          |
|---|-----------|----------|----------|
| H | -17.81630 | -8.55430 | 5.12120  |
| H | -17.87360 | -8.93030 | 6.86470  |
| H | -18.39420 | -7.31950 | 6.27530  |
| O | -10.43210 | -8.21900 | 16.99070 |
| O | -16.12120 | 2.10170  | 13.52340 |
| C | -17.22970 | 2.30410  | 14.38730 |
| H | -18.14620 | 1.86890  | 13.97030 |
| H | -17.04360 | 1.88430  | 15.38380 |
| H | -17.34890 | 3.38630  | 14.46770 |
| C | -11.15130 | -9.07420 | 17.86690 |
| H | -11.85200 | -8.50740 | 18.49230 |
| H | -11.69680 | -9.84890 | 17.31340 |
| H | -10.40080 | -9.54570 | 18.50430 |
| O | -16.94540 | -6.17010 | 10.73530 |
| O | -16.54400 | -2.69500 | 13.94440 |
| O | -14.52500 | -6.82960 | 14.82060 |
| C | -17.68170 | -2.55050 | 14.77490 |
| H | -18.50270 | -2.03990 | 14.25290 |
| H | -17.44590 | -2.00220 | 15.69720 |
| H | -17.99420 | -3.56490 | 15.03090 |
| C | -18.27960 | -6.64380 | 10.75180 |
| H | -18.67050 | -6.39710 | 11.74110 |
| H | -18.89610 | -6.15130 | 9.98740  |
| H | -18.32610 | -7.73180 | 10.60570 |
| C | -15.30160 | -7.62500 | 15.69750 |
| H | -16.33930 | -7.47930 | 15.39030 |
| H | -15.18600 | -7.30780 | 16.74310 |
| H | -15.04720 | -8.69050 | 15.61430 |
| C | -8.86440  | -6.48060 | 15.11740 |
| O | -8.34710  | -5.64230 | 14.39690 |
| N | -8.13530  | -7.33580 | 15.92270 |
| H | -8.64010  | -7.99770 | 16.50810 |
| N | -6.78340  | -7.30030 | 15.96150 |
| C | -13.74130 | 1.72250  | 11.72420 |
| O | -12.83870 | 1.44440  | 10.94990 |
| N | -13.35900 | 4.08070  | 11.61510 |
| H | -14.82080 | 3.17050  | 12.73670 |
| N | -14.06190 | 3.01960  | 12.07610 |
| C | -13.51840 | -6.69200 | 6.23860  |
| O | -12.34590 | -6.41100 | 6.42780  |
| N | -14.01730 | -7.05520 | 5.00190  |
| H | -15.00260 | -7.29920 | 4.92890  |
| N | -13.22680 | -7.11750 | 3.90690  |
| C | -13.81430 | -7.44680 | 2.81150  |
| C | -11.76660 | -7.64480 | -0.94850 |
| C | -13.14360 | -7.89840 | -0.85870 |
| C | -13.79710 | -7.84520 | 0.36810  |
| C | -13.09860 | -7.53440 | 1.54470  |
| C | -11.71580 | -7.29760 | 1.46500  |
| C | -11.06920 | -7.35650 | 0.24270  |

|   |           |           |          |
|---|-----------|-----------|----------|
| H | -13.71370 | -8.10430  | -1.76090 |
| H | -14.86940 | -8.02690  | 0.41440  |
| H | -11.16790 | -7.07090  | 2.37420  |
| H | -9.99620  | -7.19590  | 0.20470  |
| C | -6.22460  | -8.16720  | 16.72980 |
| C | -1.97100  | -8.56140  | 17.10900 |
| C | -2.84450  | -9.42510  | 17.78690 |
| C | -4.22270  | -9.27990  | 17.66790 |
| C | -4.77630  | -8.27030  | 16.86530 |
| C | -3.90760  | -7.39030  | 16.19760 |
| C | -2.53640  | -7.53600  | 16.32320 |
| H | -2.44190  | -10.23900 | 18.38400 |
| H | -4.88280  | -9.97180  | 18.18800 |
| H | -4.32970  | -6.59830  | 15.58680 |
| H | -1.88280  | -6.83050  | 15.81940 |
| C | -13.72030 | 5.22380   | 12.08190 |
| C | -11.71890 | 8.91880   | 11.21360 |
| C | -12.77050 | 8.85610   | 12.13940 |
| C | -13.42710 | 7.65580   | 12.38980 |
| C | -13.05330 | 6.47310   | 11.73200 |
| C | -12.02230 | 6.53410   | 10.77930 |
| C | -11.37840 | 7.73400   | 10.52630 |
| H | -13.04840 | 9.74440   | 12.69900 |
| H | -14.22410 | 7.62560   | 13.13060 |
| H | -11.73720 | 5.62920   | 10.25150 |
| H | -10.59880 | 7.76340   | 9.77150  |
| H | -14.54540 | 5.30430   | 12.80620 |
| H | -14.89340 | -7.66150  | 2.78290  |
| H | -6.82330  | -8.88570  | 17.31020 |

**Model of the terphenyl-linked molecular cage 12** (with the  $-(\text{CH}_2)_4(\text{OCH}_2\text{CH}_2)_3\text{OCH}_3$  substituents replaced by methyl groups)

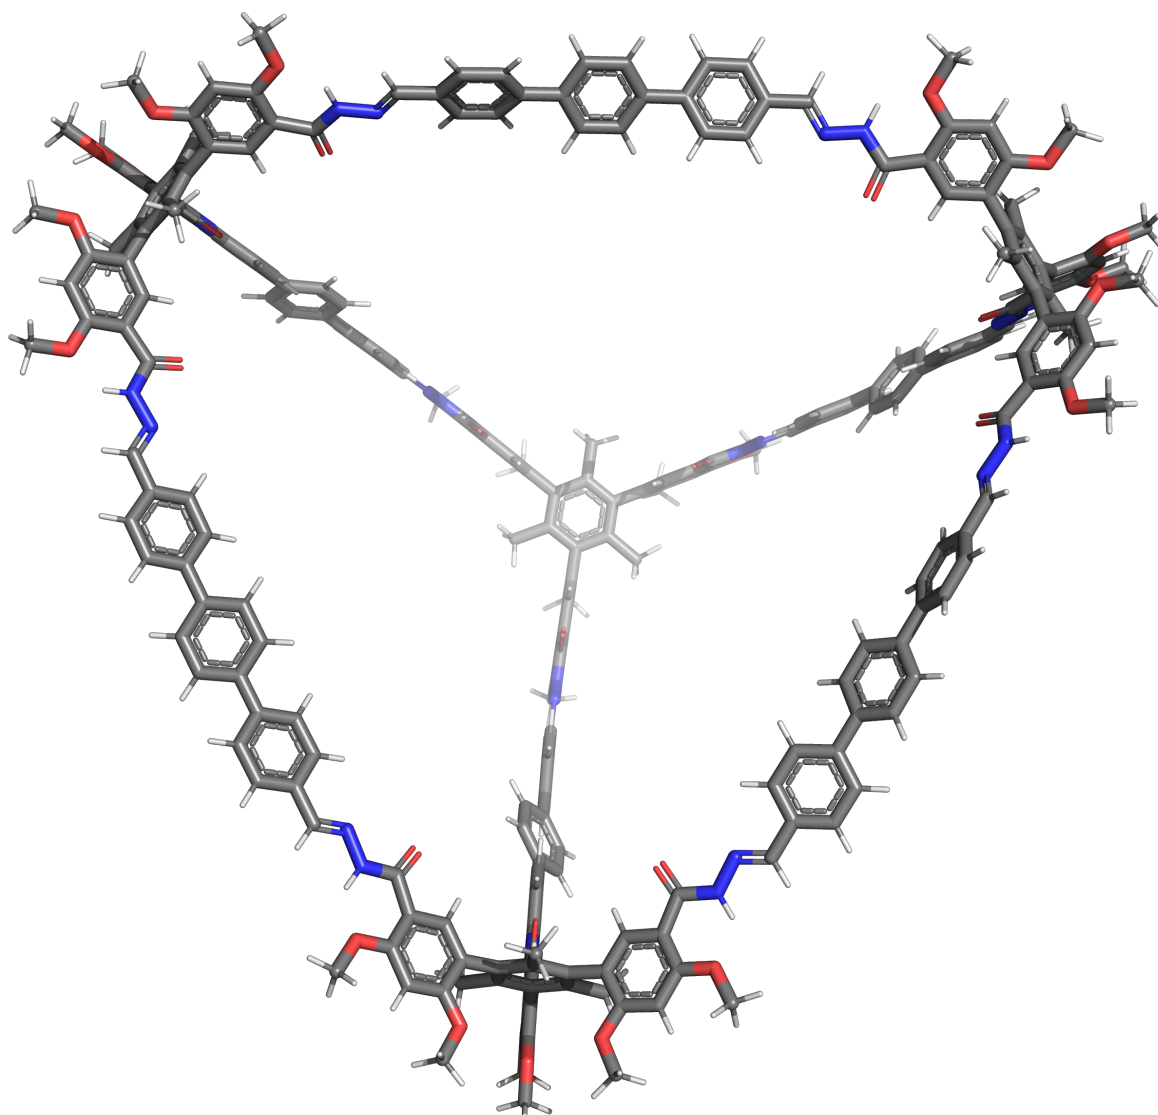

|   |         |          |           |
|---|---------|----------|-----------|
| C | 4.81940 | -7.12580 | -10.77130 |
| C | 3.66230 | -6.38710 | -11.06560 |
| C | 2.38400 | -6.95870 | -10.91150 |
| C | 2.26900 | -8.28490 | -10.45750 |
| C | 3.42100 | -9.04090 | -10.16190 |
| C | 4.68690 | -8.45430 | -10.32540 |
| C | 3.97280 | -2.38340 | -12.65760 |
| C | 3.96490 | -3.48570 | -13.51700 |
| C | 3.86550 | -4.77920 | -12.99800 |
| C | 3.77300 | -4.99520 | -11.60830 |
| C | 3.78310 | -3.87590 | -10.78680 |
| C | 3.88280 | -2.55760 | -11.26030 |
| H | 4.03520 | -3.33720 | -14.58490 |



|   |          |           |           |
|---|----------|-----------|-----------|
| H | 3.71860  | -3.99890  | -9.71030  |
| C | 8.26230  | -10.77120 | -9.62090  |
| C | 7.62760  | -10.14200 | -8.53090  |
| C | 6.46360  | -9.40650  | -8.80320  |
| C | 5.91720  | -9.26860  | -10.07170 |
| C | 6.57030  | -9.92670  | -11.13330 |
| C | 7.73220  | -10.67060 | -10.91070 |
| H | 5.98250  | -8.92700  | -7.95650  |
| H | 8.22260  | -11.16580 | -11.73620 |
| C | -1.63530 | -10.10070 | -10.11320 |
| C | -0.91360 | -10.20460 | -11.30640 |
| C | 0.34910  | -9.61530  | -11.41560 |
| C | 0.91500  | -8.91410  | -10.33170 |
| C | 0.16860  | -8.83330  | -9.16410  |
| C | -1.10430 | -9.40490  | -9.00770  |
| H | -1.33250 | -10.74070 | -12.14580 |
| H | 0.56880  | -8.30190  | -8.30670  |
| C | 6.19990  | -6.53130  | -10.95860 |
| H | 6.85360  | -6.77160  | -10.11440 |
| H | 6.67640  | -6.93610  | -11.86140 |
| H | 6.16280  | -5.44510  | -11.05940 |
| C | 3.32350  | -10.48190 | -9.70230  |
| H | 3.87810  | -10.64200 | -8.77160  |
| H | 2.28930  | -10.78510 | -9.53190  |
| H | 3.75670  | -11.15880 | -10.45020 |
| C | 1.16160  | -6.13870  | -11.27100 |
| H | 0.23860  | -6.64650  | -10.99060 |
| H | 1.17510  | -5.16290  | -10.77410 |
| H | 1.12740  | -5.94620  | -12.35130 |
| O | 9.41020  | -11.48860 | -9.37800  |
| C | 10.05720 | -12.16390 | -10.44630 |
| H | 10.92110 | -12.66250 | -10.00260 |
| H | 9.39860  | -12.91480 | -10.89990 |
| H | 10.39910 | -11.46200 | -11.21760 |
| O | -2.87950 | -10.67420 | -9.98670  |
| O | 4.07050  | -1.10360  | -13.15400 |
| C | 4.17770  | -0.89470  | -14.55480 |
| H | 5.07840  | -1.37010  | -14.96270 |
| H | 3.29300  | -1.26910  | -15.08450 |
| H | 4.24790  | 0.18650   | -14.68970 |
| C | -3.44220 | -11.38640 | -11.07870 |
| H | -3.58330 | -10.73600 | -11.95100 |
| H | -2.82040 | -12.24580 | -11.35850 |
| H | -4.41450 | -11.74200 | -10.73220 |
| O | 6.00240  | -9.78650  | -12.36380 |
| O | 3.84940  | -5.89390  | -13.78020 |
| O | 1.10310  | -9.67660  | -12.54720 |
| C | 3.95820  | -5.75050  | -15.18460 |
| H | 4.90470  | -5.27210  | -15.47160 |
| H | 3.12180  | -5.17230  | -15.60080 |

|   |          |           |           |
|---|----------|-----------|-----------|
| H | 3.93040  | -6.76400  | -15.59000 |
| C | 6.58910  | -10.44450 | -13.47170 |
| H | 5.95770  | -10.20310 | -14.32920 |
| H | 7.61040  | -10.08750 | -13.66320 |
| H | 6.60880  | -11.53410 | -13.33240 |
| C | 0.59760  | -10.36590 | -13.67550 |
| H | 1.36780  | -10.28140 | -14.44500 |
| H | -0.33320 | -9.91340  | -14.04460 |
| H | 0.42030  | -11.42790 | -13.45720 |
| C | -1.72370 | -9.17750  | -7.65290  |
| O | -1.13920 | -8.56160  | -6.77570  |
| N | -2.99020 | -9.70310  | -7.47670  |
| H | -3.42880 | -10.20140 | -8.24820  |
| N | -3.64540 | -9.54100  | -6.30710  |
| C | 3.89260  | -1.50680  | -10.17920 |
| O | 3.83620  | -1.80030  | -8.99480  |
| N | 4.00570  | 0.82850   | -9.75120  |
| H | 4.02610  | -0.02550  | -11.62550 |
| N | 3.97010  | -0.20050  | -10.62440 |
| C | 8.02080  | -10.17450 | -7.07880  |
| O | 7.27410  | -9.76870  | -6.20210  |
| N | 9.28830  | -10.66120 | -6.81670  |
| H | 9.85910  | -10.99170 | -7.59180  |
| N | 9.72790  | -10.78310 | -5.54600  |
| C | 10.93460 | -11.19610 | -5.38870  |
| C | 14.31160 | -12.36060 | 2.44830   |
| C | 14.78650 | -13.09140 | 1.34760   |
| C | 14.25280 | -12.90760 | 0.07740   |
| C | 13.21900 | -11.98500 | -0.15100  |
| C | 12.74280 | -11.25550 | 0.95110   |
| C | 13.27420 | -11.44070 | 2.22020   |
| H | 15.60000 | -13.79860 | 1.48500   |
| H | 14.63440 | -13.50190 | -0.74870  |
| H | 11.95710 | -10.51880 | 0.80890   |
| H | 12.86790 | -10.87250 | 3.05210   |
| C | -4.83020 | -10.03280 | -6.23820  |
| C | -7.21650 | -9.67590  | -2.69970  |
| C | -7.72050 | -10.29970 | -3.85030  |
| C | -6.93980 | -10.41760 | -4.99500  |
| C | -5.63290 | -9.91110  | -5.02650  |
| C | -5.12260 | -9.28290  | -3.87700  |
| C | -5.90210 | -9.17150  | -2.73820  |
| H | -8.72220 | -10.72070 | -3.83660  |
| H | -7.34470 | -10.91500 | -5.87450  |
| H | -4.11470 | -8.88080  | -3.90480  |
| H | -5.50240 | -8.65960  | -1.86720  |
| C | 4.10690  | 2.00520   | -10.25790 |
| C | 4.27210  | 5.53830   | -7.83540  |
| C | 4.35780  | 5.61350   | -9.23360  |
| C | 4.30080  | 4.46340   | -10.01330 |

|   |          |           |           |
|---|----------|-----------|-----------|
| C | 4.16020  | 3.19950   | -9.42120  |
| C | 4.07790  | 3.11680   | -8.02030  |
| C | 4.13240  | 4.26560   | -7.24820  |
| H | 4.44000  | 6.58480   | -9.71420  |
| H | 4.35670  | 4.54570   | -11.09740 |
| H | 3.98070  | 2.13930   | -7.55820  |
| H | 4.09440  | 4.18010   | -6.16580  |
| H | 4.16260  | 2.16050   | -11.34620 |
| H | 11.58680 | -11.41450 | -6.24770  |
| H | -5.28810 | -10.55790 | -7.08980  |
| C | 3.80950  | 17.34950  | 6.42470   |
| C | 5.00280  | 17.24150  | 5.69340   |
| C | 6.24370  | 17.12170  | 6.34980   |
| C | 6.28160  | 17.10590  | 7.75450   |
| C | 5.09260  | 17.20290  | 8.50340   |
| C | 3.86740  | 17.33110  | 7.83070   |
| C | 4.91830  | 17.43320  | 1.38200   |
| C | 5.02420  | 18.60590  | 2.13610   |
| C | 5.05560  | 18.54100  | 3.53160   |
| C | 4.97650  | 17.30240  | 4.19830   |
| C | 4.87590  | 16.16020  | 3.41640   |
| C | 4.84280  | 16.17380  | 2.01340   |
| H | 5.08100  | 19.56410  | 1.64000   |
| H | 4.81130  | 15.18720  | 3.89280   |
| C | 0.24100  | 17.86150  | 10.11080  |
| C | 0.63620  | 16.55680  | 9.74730   |
| C | 1.82140  | 16.43170  | 9.00600   |
| C | 2.60900  | 17.50730  | 8.62090   |
| C | 2.18240  | 18.79440  | 9.00380   |
| C | 1.00910  | 18.96990  | 9.74170   |
| H | 2.11680  | 15.42370  | 8.73220   |
| H | 0.69570  | 19.96340  | 10.02810  |
| C | 10.08530 | 16.94620  | 9.78810   |
| C | 9.51720  | 18.17880  | 9.45260   |
| C | 8.28430  | 18.22690  | 8.79670   |
| C | 7.59860  | 17.04210  | 8.46260   |
| C | 8.19150  | 15.83810  | 8.81510   |
| C | 9.42600  | 15.73890  | 9.47510   |
| H | 10.03200 | 19.09560  | 9.70090   |
| H | 7.69170  | 14.90400  | 8.57970   |
| C | 2.47120  | 17.51750  | 5.73460   |
| H | 2.07850  | 18.53080  | 5.89240   |
| H | 2.54490  | 17.34970  | 4.65870   |
| H | 1.72670  | 16.82170  | 6.13490   |
| C | 5.11820  | 17.20700  | 10.01800  |
| H | 4.34130  | 16.55640  | 10.43110  |
| H | 6.08090  | 16.87380  | 10.40850  |
| H | 4.93100  | 18.21680  | 10.40520  |
| C | 7.51310  | 17.04380  | 5.52510   |
| H | 8.38650  | 16.82690  | 6.14190   |

|   |          |          |          |
|---|----------|----------|----------|
| H | 7.44140  | 16.26670 | 4.75690  |
| H | 7.69490  | 17.99220 | 5.00250  |
| O | -0.91770 | 18.01670 | 10.83740 |
| C | -1.34270 | 19.31720 | 11.21880 |
| H | -2.27120 | 19.17510 | 11.77520 |
| H | -0.60360 | 19.80600 | 11.86570 |
| H | -1.53770 | 19.94780 | 10.34250 |
| O | 11.29930 | 16.88190 | 10.43280 |
| O | 4.88360  | 17.47920 | 0.00680  |
| C | 4.94180  | 18.73330 | -0.65760 |
| H | 4.09310  | 19.37160 | -0.38170 |
| H | 5.88080  | 19.25800 | -0.44150 |
| H | 4.89180  | 18.50740 | -1.72460 |
| C | 11.99160 | 18.07880 | 10.75620 |
| H | 12.24160 | 18.65260 | 9.85510  |
| H | 11.40760 | 18.70650 | 11.44080 |
| H | 12.91250 | 17.76480 | 11.25150 |
| O | 2.97670  | 19.82970 | 8.61220  |
| O | 5.15970  | 19.64190 | 4.32650  |
| O | 7.67550  | 19.39150 | 8.44200  |
| C | 5.21460  | 20.92330 | 3.72730  |
| H | 4.31010  | 21.13650 | 3.14140  |
| H | 6.09670  | 21.03330 | 3.08160  |
| H | 5.28360  | 21.63460 | 4.55300  |
| C | 2.61010  | 21.15110 | 8.96460  |
| H | 3.38730  | 21.79610 | 8.54920  |
| H | 1.63920  | 21.43220 | 8.53400  |
| H | 2.57330  | 21.28600 | 10.05430 |
| C | 8.31460  | 20.61980 | 8.73620  |
| H | 7.64900  | 21.39910 | 8.35910  |
| H | 9.28810  | 20.70190 | 8.23350  |
| H | 8.45480  | 20.75660 | 9.81730  |
| C | 9.86500  | 14.32620 | 9.75920  |
| O | 9.17790  | 13.36320 | 9.45510  |
| N | 11.09260 | 14.20330 | 10.38100 |
| H | 11.61330 | 15.04580 | 10.61530 |
| N | 11.58640 | 12.98690 | 10.69650 |
| C | 4.72830  | 14.81040 | 1.38200  |
| O | 4.65770  | 13.79250 | 2.05360  |
| N | 4.63720  | 13.63730 | -0.68190 |
| H | 4.78000  | 15.68350 | -0.49890 |
| N | 4.71450  | 14.79900 | 0.00030  |
| C | -0.05120 | 15.25020 | 10.04800 |
| O | 0.40790  | 14.17950 | 9.68050  |
| N | -1.23040 | 15.35630 | 10.75990 |
| H | -1.55860 | 16.28010 | 11.03300 |
| N | -1.95130 | 14.25850 | 11.07280 |
| C | -3.04560 | 14.45740 | 11.71650 |
| C | -8.22210 | 7.96640  | 13.97890 |
| C | -8.75370 | 9.19810  | 13.56410 |

|   |          |           |          |
|---|----------|-----------|----------|
| C | -7.92360 | 10.25470  | 13.20770 |
| C | -5.99460 | 8.89400   | 13.66730 |
| C | -6.82390 | 7.83850   | 14.02350 |
| H | -9.83090 | 9.31390   | 13.47810 |
| H | -8.36400 | 11.18130  | 12.84880 |
| H | -4.91740 | 8.77440   | 13.74520 |
| H | -6.38200 | 6.90980   | 14.37410 |
| C | 12.72760 | 12.96740  | 11.28670 |
| C | 16.51480 | 5.61610   | 13.67970 |
| C | 16.62270 | 6.77230   | 14.46860 |
| C | 16.01870 | 7.96340   | 14.08430 |
| C | 15.28210 | 8.05320   | 12.89260 |
| C | 15.17520 | 6.89660   | 12.10260 |
| C | 15.77610 | 5.70470   | 12.48790 |
| H | 17.14910 | 6.72410   | 15.41830 |
| H | 16.08140 | 8.82680   | 14.73990 |
| H | 14.64110 | 6.94180   | 11.15740 |
| H | 15.69630 | 4.83780   | 11.83760 |
| C | 4.65770  | 13.72490  | -1.96380 |
| C | 4.32280  | 6.75270   | -6.99310 |
| C | 3.55760  | 6.84560   | -5.81860 |
| C | 3.60810  | 7.97850   | -5.01700 |
| C | 5.18960  | 8.97820   | -6.52830 |
| C | 5.13930  | 7.84410   | -7.33040 |
| H | 2.88940  | 6.03230   | -5.54910 |
| H | 2.97920  | 8.03410   | -4.13260 |
| H | 5.86420  | 9.78860   | -6.79170 |
| H | 5.77560  | 7.78400   | -8.20950 |
| H | 4.73460  | 14.69730  | -2.47350 |
| H | -3.37340 | 15.47030  | 11.99610 |
| H | 13.27080 | 13.89560  | 11.52060 |
| C | 17.42020 | -8.04450  | 17.55440 |
| C | 18.32580 | -7.68790  | 16.54350 |
| C | 18.60070 | -8.56000  | 15.47290 |
| C | 17.94890 | -9.80240  | 15.42360 |
| C | 17.03760 | -10.18040 | 16.43240 |
| C | 16.77930 | -9.29960  | 17.49690 |
| C | 20.39440 | -3.90760  | 16.83060 |
| C | 20.95860 | -5.06210  | 17.38190 |
| C | 20.28840 | -6.28460  | 17.28420 |
| C | 19.04470 | -6.37710  | 16.62930 |
| C | 18.51890 | -5.21110  | 16.09080 |
| C | 19.14920 | -3.95910  | 16.16970 |
| H | 21.91270 | -5.00830  | 17.88610 |
| H | 17.55990 | -5.23800  | 15.58310 |
| C | 14.10760 | -10.47570 | 20.68530 |
| C | 13.56570 | -9.95050  | 19.49510 |
| C | 14.47040 | -9.57940  | 18.48750 |
| C | 15.84870 | -9.70810  | 18.59890 |
| C | 16.35140 | -10.25580 | 19.79710 |

|   |          |           |          |
|---|----------|-----------|----------|
| C | 15.48930 | -10.63330 | 20.83110 |
| H | 14.04230 | -9.18060  | 17.57340 |
| H | 15.89140 | -11.04680 | 21.74470 |
| C | 18.80750 | -12.56410 | 12.21300 |
| C | 19.48240 | -12.67370 | 13.43320 |
| C | 19.20290 | -11.78020 | 14.47120 |
| C | 18.24220 | -10.76140 | 14.31050 |
| C | 17.60230 | -10.67750 | 13.08110 |
| C | 17.85310 | -11.54770 | 12.00820 |
| H | 20.22090 | -13.44970 | 13.57440 |
| H | 16.87410 | -9.89130  | 12.90910 |
| O | 13.23980 | -10.83400 | 21.69030 |
| O | 19.06010 | -13.43370 | 11.17750 |
| O | 21.03760 | -2.69400  | 16.92000 |
| O | 17.70430 | -10.38540 | 19.87470 |
| O | 20.77710 | -7.44560  | 17.80330 |
| O | 19.82480 | -11.82970 | 15.68230 |
| C | 17.08780 | -11.22880 | 10.75120 |
| O | 16.46750 | -10.18480 | 10.62580 |
| N | 17.11540 | -12.20320 | 9.76960  |
| H | 17.66130 | -13.04730 | 9.92920  |
| N | 16.52650 | -11.98760 | 8.57330  |
| C | 18.36980 | -2.83090  | 15.54580 |
| O | 17.28760 | -3.01410  | 15.00960 |
| N | 18.32040 | -0.48850  | 15.17010 |
| H | 19.85710 | -1.49460  | 16.10490 |
| N | 18.95830 | -1.58340  | 15.63580 |
| C | 12.11630 | -9.77410  | 19.13080 |
| O | 11.76860 | -9.51950  | 17.98850 |
| N | 11.21590 | -9.89600  | 20.17420 |
| H | 11.56350 | -10.11780 | 21.10460 |
| N | 9.88780  | -9.84520  | 19.93710 |
| C | 9.11020  | -9.93510  | 20.95610 |
| C | 4.84000  | -9.97010  | 20.54250 |
| C | 5.44520  | -9.94320  | 21.80840 |
| C | 6.83010  | -9.93120  | 21.93710 |
| C | 7.65780  | -9.93680  | 20.80480 |
| C | 7.05810  | -9.95780  | 19.53340 |
| C | 5.67890  | -9.97640  | 19.41040 |
| H | 4.82490  | -9.90470  | 22.69980 |
| H | 7.27740  | -9.90280  | 22.92920 |
| H | 7.69540  | -9.97490  | 18.65480 |
| H | 5.23670  | -10.02930 | 18.41970 |
| C | 16.56120 | -12.95270 | 7.72590  |
| C | 14.88850 | -12.52930 | 3.79960  |
| C | 15.37790 | -13.76640 | 4.24670  |
| C | 15.92290 | -13.90020 | 5.51980  |
| C | 15.98840 | -12.80380 | 6.39140  |
| C | 15.49990 | -11.56170 | 5.95010  |
| C | 14.96490 | -11.43210 | 4.68010  |

|   |           |           |          |
|---|-----------|-----------|----------|
| H | 15.30510  | -14.63800 | 3.60180  |
| H | 16.28700  | -14.87160 | 5.84970  |
| H | 15.56290  | -10.70840 | 6.61810  |
| H | 14.62560  | -10.45570 | 4.34640  |
| C | 18.91060  | 0.63990   | 15.34170 |
| C | 17.14120  | 4.34270   | 14.09620 |
| C | 16.50250  | 3.11380   | 13.84050 |
| C | 17.06730  | 1.91140   | 14.23350 |
| C | 18.30540  | 1.89250   | 14.89990 |
| C | 18.95050  | 3.11220   | 15.15240 |
| C | 18.37710  | 4.31710   | 14.75970 |
| H | 15.53110  | 3.11060   | 13.35410 |
| H | 16.55940  | 0.97040   | 14.04650 |
| H | 19.91430  | 3.11530   | 15.65870 |
| H | 18.90530  | 5.24840   | 14.94670 |
| H | 19.88880  | 0.70990   | 15.84130 |
| H | 9.50540   | -10.01980 | 21.97960 |
| H | 17.02240  | -13.92160 | 7.96960  |
| C | -13.62700 | -5.28930  | 14.16200 |
| C | -13.17970 | -4.76790  | 15.39600 |
| C | -12.46400 | -5.57030  | 16.29700 |
| C | -12.19020 | -6.91260  | 15.95670 |
| C | -12.62730 | -7.44480  | 14.73550 |
| C | -13.35040 | -6.62540  | 13.84190 |
| C | -14.17430 | -0.67980  | 16.38600 |
| C | -15.04800 | -1.71770  | 16.72450 |
| C | -14.72600 | -3.03970  | 16.40410 |
| C | -13.51990 | -3.35010  | 15.74420 |
| C | -12.68060 | -2.29180  | 15.42270 |
| C | -12.96120 | -0.94870  | 15.71870 |
| H | -15.97490 | -1.49720  | 17.23410 |
| H | -11.74290 | -2.48470  | 14.91290 |
| C | -14.88270 | -8.37690  | 10.20060 |
| C | -13.59080 | -7.81160  | 10.19480 |
| C | -13.13380 | -7.24830  | 11.39770 |
| C | -13.87420 | -7.22450  | 12.57190 |
| C | -15.15740 | -7.80700  | 12.53920 |
| C | -15.65830 | -8.37400  | 11.36410 |
| H | -12.13980 | -6.81260  | 11.37990 |
| H | -16.64610 | -8.81140  | 11.35520 |
| C | -10.11780 | -9.39910  | 18.82070 |
| C | -11.51530 | -9.40520  | 18.76510 |
| C | -12.18350 | -8.59700  | 17.84050 |
| C | -11.46710 | -7.77410  | 16.94740 |
| C | -10.08220 | -7.78060  | 17.04780 |
| C | -9.36740  | -8.57040  | 17.96260 |
| H | -12.08000 | -10.03500 | 19.43730 |
| H | -9.49430  | -7.14590  | 16.39230 |
| C | -14.42290 | -4.40390  | 13.22510 |
| H | -14.57640 | -4.87610  | 12.25330 |

|   |           |           |          |
|---|-----------|-----------|----------|
| H | -15.40960 | -4.17720  | 13.65030 |
| H | -13.91980 | -3.44550  | 13.05940 |
| C | -12.36780 | -8.89190  | 14.37430 |
| H | -11.97550 | -8.98640  | 13.35680 |
| H | -11.65230 | -9.35140  | 15.05710 |
| H | -13.29710 | -9.47540  | 14.41560 |
| C | -12.00960 | -5.03450  | 17.63920 |
| H | -10.92940 | -5.15480  | 17.77460 |
| H | -12.24520 | -3.97540  | 17.74770 |
| H | -12.49480 | -5.57760  | 18.46040 |
| O | -15.35890 | -8.93020  | 9.03390  |
| C | -16.65850 | -9.50250  | 9.00480  |
| H | -16.80150 | -9.86440  | 7.98470  |
| H | -16.74100 | -10.34450 | 9.70330  |
| H | -17.42910 | -8.75670  | 9.23640  |
| O | -9.43680  | -10.19220 | 19.71520 |
| O | -14.47530 | 0.62690   | 16.69410 |
| C | -15.68060 | 0.93090   | 17.38100 |
| H | -16.56050 | 0.63580   | 16.79590 |
| H | -15.71390 | 0.44550   | 18.36430 |
| H | -15.68240 | 2.01460   | 17.51320 |
| C | -10.16280 | -11.02320 | 20.60930 |
| H | -10.80820 | -10.43070 | 21.26940 |
| H | -10.76970 | -11.76100 | 20.06930 |
| H | -9.41250  | -11.54190 | 21.20930 |
| O | -15.85750 | -7.77650  | 13.70670 |
| O | -15.53560 | -4.09380  | 16.70150 |
| O | -13.54060 | -8.54920  | 17.73840 |
| C | -16.75210 | -3.85560  | 17.38600 |
| H | -17.42750 | -3.21340  | 16.80420 |
| H | -16.58100 | -3.39970  | 18.37080 |
| H | -17.21490 | -4.83550  | 17.51960 |
| C | -17.15990 | -8.33010  | 13.74480 |
| H | -17.51420 | -8.18570  | 14.76750 |
| H | -17.83970 | -7.81680  | 13.05100 |
| H | -17.15220 | -9.40410  | 13.51340 |
| C | -14.32640 | -9.33860  | 18.61220 |
| H | -15.36520 | -9.12510  | 18.35190 |
| H | -14.15560 | -9.07240  | 19.66430 |
| H | -14.13290 | -10.41150 | 18.47570 |
| C | -7.87300  | -8.38680  | 17.91370 |
| O | -7.35820  | -7.48520  | 17.27150 |
| N | -7.13340  | -9.31940  | 18.61800 |
| H | -7.62410  | -10.04260 | 19.13950 |
| N | -5.78800  | -9.21820  | 18.69580 |
| C | -11.90140 | 0.02110   | 15.26210 |
| O | -10.89110 | -0.35350  | 14.68680 |
| N | -11.28440 | 2.31000   | 15.15180 |
| H | -13.01670 | 1.60190   | 16.01630 |
| N | -12.15490 | 1.35260   | 15.53530 |



|   |           |           |          |
|---|-----------|-----------|----------|
| C | -12.60490 | -7.73520  | 9.05730  |
| O | -11.50890 | -7.21440  | 9.19250  |
| N | -13.02260 | -8.29740  | 7.86550  |
| H | -13.95080 | -8.71190  | 7.81630  |
| N | -12.21000 | -8.31650  | 6.78650  |
| C | -12.68280 | -8.86410  | 5.72470  |
| C | -8.03260  | -9.54990  | -1.47440 |
| C | -9.41360  | -9.30570  | -1.53920 |
| C | -10.17480 | -9.18420  | -0.38310 |
| C | -8.20530  | -9.54400  | 0.95090  |
| C | -7.44430  | -9.66450  | -0.20430 |
| H | -9.88730  | -9.16780  | -2.50760 |
| H | -11.23360 | -8.95260  | -0.46260 |
| H | -7.72860  | -9.67430  | 1.91860  |
| H | -6.38370  | -9.88650  | -0.12350 |
| C | -5.17620  | -10.15210 | 19.33170 |
| C | 3.36930   | -9.99910  | 20.38590 |
| C | 2.54510   | -10.65920 | 21.31150 |
| C | 1.16520   | -10.69720 | 21.14830 |
| C | 0.54590   | -10.07880 | 20.05040 |
| C | 1.37080   | -9.41880  | 19.12400 |
| C | 2.74880   | -9.37810  | 19.28890 |
| H | 2.99360   | -11.16730 | 22.16090 |
| H | 0.55520   | -11.19990 | 21.89400 |
| H | 0.92720   | -8.94620  | 18.25210 |
| H | 3.35320   | -8.84160  | 18.56300 |
| C | -11.60050 | 3.52390   | 15.43010 |
| C | -9.09680  | 6.83300   | 14.34890 |
| C | -10.31490 | 7.03390   | 15.01490 |
| C | -11.12160 | 5.95610   | 15.36460 |
| C | -9.52120  | 4.43430   | 14.38620 |
| C | -8.72050  | 5.51070   | 14.04180 |
| H | -10.61820 | 8.04150   | 15.28680 |
| H | -12.05720 | 6.13340   | 15.89200 |
| H | -9.22780  | 3.41950   | 14.13600 |
| H | -7.79680  | 5.33300   | 13.49810 |
| H | -12.53460 | 3.77060   | 15.95740 |
| H | -13.69750 | -9.28930  | 5.69790  |
| H | -5.71810  | -11.00520 | 19.76710 |
| C | -10.73890 | 4.64200   | 15.05770 |
| C | -3.72770  | -10.12780 | 19.50950 |
| C | -2.96260  | -9.02160  | 19.10080 |
| C | -1.59000  | -9.01500  | 19.28280 |
| C | -0.92200  | -10.10660 | 19.87200 |
| C | -1.69190  | -11.20760 | 20.27740 |
| C | -3.07170  | -11.21610 | 20.10310 |
| H | -3.46900  | -8.17200  | 18.65330 |
| H | -1.02180  | -8.13640  | 18.99110 |
| H | -1.20170  | -12.07720 | 20.70670 |
| H | -3.64800  | -12.08510 | 20.41570 |

|   |           |           |          |
|---|-----------|-----------|----------|
| C | 13.36420  | 11.71650  | 11.68520 |
| C | 12.76460  | 10.47200  | 11.42450 |
| C | 13.38890  | 9.29920   | 11.81690 |
| C | 14.62990  | 9.31610   | 12.48350 |
| C | 15.22170  | 10.56170  | 12.74230 |
| C | 14.59990  | 11.74160  | 12.34840 |
| H | 11.80290  | 10.44960  | 10.92140 |
| H | 12.89690  | 8.34850   | 11.63160 |
| H | 16.19150  | 10.60350  | 13.23090 |
| H | 15.08230  | 12.69660  | 12.54940 |
| C | 11.50420  | -11.39570 | -4.05960 |
| C | 10.71860  | -11.26310 | -2.90140 |
| C | 11.27880  | -11.45810 | -1.65010 |
| C | 12.64030  | -11.78740 | -1.49770 |
| C | 13.41830  | -11.91870 | -2.65810 |
| C | 12.85870  | -11.73070 | -3.91740 |
| H | 9.66670   | -11.01750 | -3.00850 |
| H | 10.64640  | -11.38350 | -0.77010 |
| H | 14.47840  | -12.14080 | -2.57160 |
| H | 13.48410  | -11.82730 | -4.80310 |
| C | 4.42530   | 9.07010   | -5.35420 |
| C | 4.59020   | 12.54060  | -2.81300 |
| C | 4.65860   | 12.67390  | -4.20760 |
| C | 4.60850   | 11.55570  | -5.03280 |
| C | 4.48280   | 10.26830  | -4.49010 |
| C | 4.41100   | 10.14280  | -3.08910 |
| C | 4.46510   | 11.25310  | -2.26290 |
| H | 4.74490   | 13.66500  | -4.64960 |
| H | 4.63830   | 11.68200  | -6.11180 |
| H | 4.34160   | 9.15320   | -2.64600 |
| H | 4.42280   | 11.14750  | -1.18340 |
| C | -9.58730  | -9.30280  | 0.88640  |
| C | -11.89620 | -8.95750  | 4.50010  |
| C | -10.58320 | -8.45890  | 4.43780  |
| C | -9.84910  | -8.57020  | 3.26910  |
| C | -10.39100 | -9.17780  | 2.12000  |
| C | -11.70400 | -9.66670  | 2.18660  |
| C | -12.44450 | -9.55920  | 3.35830  |
| H | -10.16240 | -7.98250  | 5.31770  |
| H | -8.84500  | -8.15730  | 3.22990  |
| H | -12.13590 | -10.16260 | 1.32150  |
| H | -13.45680 | -9.95790  | 3.39470  |
| C | -6.52610  | 10.12560  | 13.25080 |
| C | -3.91720  | 13.35370  | 12.10530 |
| C | -3.58180  | 12.02040  | 11.81230 |
| C | -4.42680  | 10.98870  | 12.18590 |
| C | -5.63710  | 11.24090  | 12.86100 |
| C | -5.96670  | 12.57350  | 13.14950 |
| C | -5.11980  | 13.61270  | 12.77940 |
| H | -2.65680  | 11.81920  | 11.28090 |

|   |          |           |          |
|---|----------|-----------|----------|
| H | -4.16440 | 9.96670   | 11.92720 |
| H | -6.88150 | 12.79360  | 13.69340 |
| H | -5.38970 | 14.63880  | 13.02270 |
| H | 22.58720 | -1.55740  | 17.52150 |
| C | 22.29030 | -2.60620  | 17.58380 |
| H | 22.20620 | -2.89720  | 18.63830 |
| H | 23.04850 | -3.22720  | 17.09090 |
| H | 22.18850 | -8.44940  | 18.82400 |
| C | 22.01170 | -7.42270  | 18.49700 |
| H | 22.83780 | -7.10370  | 17.84700 |
| H | 21.97090 | -6.76500  | 19.37630 |
| H | 12.87430 | -11.61980 | 23.50740 |
| C | 13.74660 | -11.40960 | 22.88550 |
| H | 14.28070 | -12.34590 | 22.68180 |
| H | 14.41160 | -10.71590 | 23.41540 |
| H | 19.35300 | -10.97880 | 20.85820 |
| C | 18.27550 | -10.96140 | 21.03480 |
| H | 18.06630 | -10.36280 | 21.93200 |
| H | 17.91880 | -11.98810 | 21.19540 |
| H | 21.21770 | -12.60400 | 16.90640 |
| C | 20.85380 | -12.77950 | 15.89190 |
| H | 20.47980 | -13.80970 | 15.81640 |
| H | 21.68120 | -12.64300 | 15.18200 |
| H | 20.07960 | -14.97850 | 10.38470 |
| C | 20.05340 | -14.43700 | 11.33220 |
| H | 21.03910 | -13.99550 | 11.52500 |
| H | 19.79930 | -15.13320 | 12.14150 |
| C | 17.17120 | -7.08970  | 18.70390 |
| H | 16.30300 | -7.38700  | 19.29310 |
| H | 18.03850 | -7.05690  | 19.37670 |
| H | 17.00350 | -6.06900  | 18.34660 |
| C | 16.38060 | -11.54420 | 16.35600 |
| H | 15.60140 | -11.66560 | 17.10950 |
| H | 15.92870 | -11.71110 | 15.37240 |
| H | 17.12280 | -12.33880 | 16.50670 |
| C | 19.61530 | -8.14840  | 14.42550 |
| H | 19.65900 | -8.85730  | 13.59740 |
| H | 19.38280 | -7.16060  | 14.01300 |
| H | 20.61810 | -8.08110  | 14.86730 |

**Model of the quarterphenyl-linked molecular cage 13** (with the  $-(\text{CH}_2)_4(\text{OCH}_2\text{CH}_2)_3\text{OCH}_3$  substituents replaced by methyl groups)

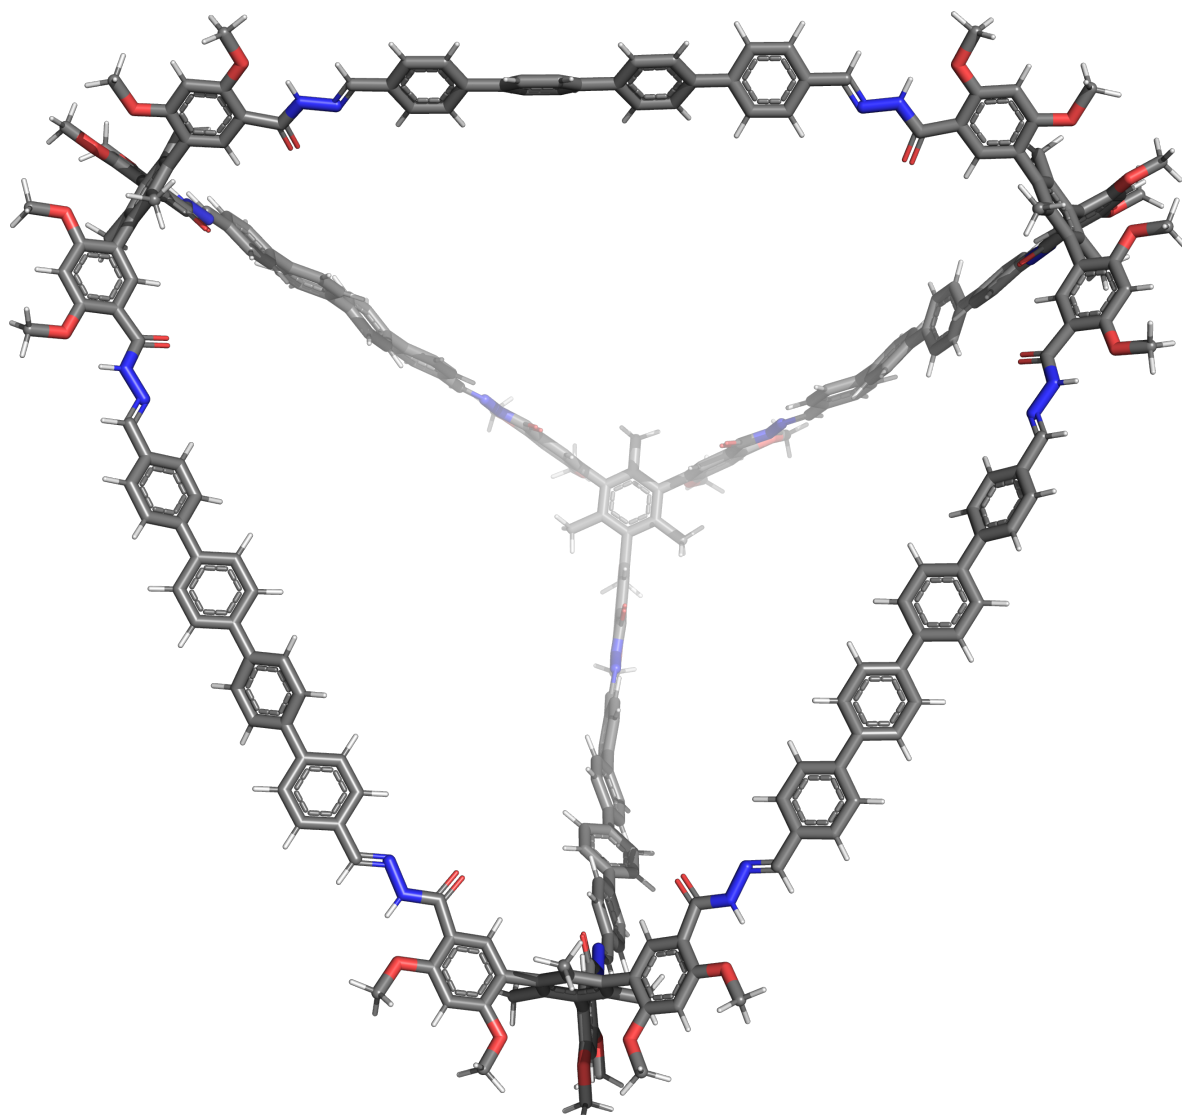

|   |         |          |           |
|---|---------|----------|-----------|
| C | 3.15390 | -6.93440 | -13.32500 |
| C | 2.10270 | -6.04380 | -13.60020 |
| C | 0.76150 | -6.44320 | -13.43370 |
| C | 0.47780 | -7.74690 | -12.98750 |
| C | 1.52180 | -8.65010 | -12.70570 |
| C | 2.85210 | -8.23440 | -12.87750 |
| C | 2.95540 | -2.08440 | -15.11590 |
| C | 2.86030 | -3.16920 | -15.99300 |
| C | 2.57790 | -4.44680 | -15.50060 |
| C | 2.39280 | -4.66720 | -14.12020 |
| C | 2.47880 | -3.56190 | -13.28370 |
| C | 2.75540 | -2.25960 | -13.73170 |

|   |          |           |           |
|---|----------|-----------|-----------|
| H | 3.00650  | -3.02020  | -17.05310 |
| H | 2.32910  | -3.68380  | -12.21560 |
| C | 6.08650  | -11.01320 | -12.18670 |
| C | 5.61290  | -10.23420 | -11.11120 |
| C | 4.55420  | -9.35110  | -11.37850 |
| C | 3.96620  | -9.20460  | -12.62800 |
| C | 4.46090  | -10.00860 | -13.67440 |
| C | 5.51020  | -10.90510 | -13.45590 |
| H | 4.19440  | -8.75860  | -10.54310 |
| H | 5.87830  | -11.51360 | -14.26940 |
| C | -3.63280 | -9.01660  | -12.61160 |
| C | -2.96410 | -9.15160  | -13.83230 |
| C | -1.63160 | -8.74560  | -13.94930 |
| C | -0.94520 | -8.19310  | -12.84920 |
| C | -1.63720 | -8.09030  | -11.65060 |
| C | -2.97330 | -8.48650  | -11.48420 |
| H | -3.47770 | -9.56950  | -14.68610 |
| H | -1.13680 | -7.68810  | -10.77570 |
| C | 4.59940  | -6.53320  | -13.52980 |
| H | 5.21580  | -6.80760  | -12.66770 |
| H | 5.02360  | -7.04460  | -14.40400 |
| H | 4.69840  | -5.45890  | -13.68860 |
| C | 1.23940  | -10.06890 | -12.25490 |
| H | 1.80480  | -10.31980 | -11.35120 |
| H | 0.18080  | -10.22570 | -12.04320 |
| H | 1.53970  | -10.78760 | -13.02870 |
| C | -0.34770 | -5.46580  | -13.76770 |
| H | -1.33110 | -5.86520  | -13.51580 |
| H | -0.22090 | -4.51990  | -13.23030 |
| H | -0.34370 | -5.22480  | -14.83880 |
| O | 7.12540  | -11.88370 | -11.95190 |
| C | 7.61430  | -12.69860 | -13.00720 |
| H | 8.41840  | -13.29610 | -12.57330 |
| H | 6.83290  | -13.36650 | -13.39010 |
| H | 8.01500  | -12.09320 | -13.83000 |
| O | -4.94550 | -9.40300  | -12.47390 |
| O | 3.24100  | -0.81990  | -15.57730 |
| C | 3.43120  | -0.60390  | -16.96810 |
| H | 4.28320  | -1.17980  | -17.35100 |
| H | 2.52970  | -0.85920  | -17.53850 |
| H | 3.63760  | 0.46260   | -17.07800 |
| C | -5.63360 | -9.96380  | -13.58200 |
| H | -5.69790 | -9.25380  | -14.41620 |
| H | -5.15210 | -10.88840 | -13.92370 |
| H | -6.63890 | -10.19210 | -13.22280 |
| O | 3.85760  | -9.85180  | -14.88600 |
| O | 2.46730  | -5.54250  | -16.30150 |
| O | -0.92040 | -8.85100  | -15.10520 |
| C | 2.63590  | -5.39440  | -17.69920 |
| H | 3.64250  | -5.03330  | -17.95110 |

|   |           |           |           |
|---|-----------|-----------|-----------|
| H | 1.89020   | -4.71100  | -18.12800 |
| H | 2.49540   | -6.39100  | -18.12260 |
| C | 4.29090   | -10.64130 | -15.97850 |
| H | 3.66100   | -10.35230 | -16.82230 |
| H | 5.34270   | -10.44640 | -16.22930 |
| H | 4.16060   | -11.71400 | -15.78100 |
| C | -1.53890  | -9.41810  | -16.24530 |
| H | -0.77900  | -9.41230  | -17.02950 |
| H | -2.40340  | -8.82610  | -16.57590 |
| H | -1.85970  | -10.45250 | -16.06060 |
| C | -3.50670  | -8.30530  | -10.08810 |
| O | -2.77610  | -8.01620  | -9.15400  |
| N | -4.87350  | -8.45820  | -9.94830  |
| H | -5.42540  | -8.71850  | -10.76300 |
| N | -5.45950  | -8.33630  | -8.73800  |
| C | 2.77870   | -1.21570  | -12.64560 |
| O | 2.44430   | -1.47400  | -11.50020 |
| N | 3.25570   | 1.05680   | -12.14300 |
| H | 3.47940   | 0.19170   | -14.00190 |
| N | 3.22010   | 0.03730   | -13.02990 |
| C | 6.09140   | -10.22180 | -9.68230  |
| O | 5.49170   | -9.61350  | -8.81030  |
| N | 7.26370   | -10.91430 | -9.44150  |
| H | 7.70870   | -11.40790 | -10.21250 |
| N | 7.79870   | -10.96520 | -8.20150  |
| C | 8.91600   | -11.58940 | -8.08700  |
| C | 15.09660  | -12.59710 | 3.22220   |
| C | 15.70560  | -12.98220 | 2.01740   |
| C | 15.03520  | -12.86870 | 0.80550   |
| C | 13.72690  | -12.36250 | 0.74120   |
| C | 13.11700  | -11.97880 | 1.94620   |
| C | 13.78580  | -12.09520 | 3.15830   |
| H | 16.72600  | -13.35600 | 2.02790   |
| H | 15.52970  | -13.19250 | -0.10640  |
| H | 12.11200  | -11.56580 | 1.93260   |
| H | 13.27770  | -11.80620 | 4.07400   |
| C | -6.73660  | -8.46850  | -8.70080  |
| C | -8.92250  | -8.16790  | -5.03110  |
| C | -9.58690  | -8.33340  | -6.25500  |
| C | -8.87230  | -8.43600  | -7.44360  |
| C | -7.47210  | -8.36660  | -7.44530  |
| C | -6.80070  | -8.19620  | -6.22190  |
| C | -7.51620  | -8.10270  | -5.04030  |
| H | -10.67070 | -8.41170  | -6.27020  |
| H | -9.40520  | -8.57750  | -8.38220  |
| H | -5.71720  | -8.13170  | -6.22500  |
| H | -6.98470  | -7.94810  | -4.10540  |
| C | 3.70840   | 2.17920   | -12.57430 |
| C | 3.89680   | 5.66090   | -10.08280 |
| C | 4.39430   | 5.68430   | -11.39400 |

|   |          |           |           |
|---|----------|-----------|-----------|
| C | 4.32990  | 4.55070   | -12.19840 |
| C | 3.77490  | 3.35690   | -11.71470 |
| C | 3.28540  | 3.32490   | -10.39760 |
| C | 3.34530  | 4.45730   | -9.60320  |
| H | 4.80630  | 6.60610   | -11.79660 |
| H | 4.70690  | 4.59360   | -13.21880 |
| H | 2.86670  | 2.39860   | -10.01700 |
| H | 2.98340  | 4.40980   | -8.58000  |
| H | 4.06290  | 2.29940   | -13.60850 |
| H | 9.41240  | -12.04640 | -8.95640  |
| H | -7.32530 | -8.65790  | -9.61100  |
| C | 3.79010  | 21.21110  | 6.55910   |
| C | 4.96960  | 21.06530  | 5.81080   |
| C | 6.21650  | 20.93320  | 6.45120   |
| C | 6.27710  | 20.94750  | 7.85630   |
| C | 5.10450  | 21.10160  | 8.62120   |
| C | 3.87050  | 21.23330  | 7.96380   |
| C | 4.82390  | 21.17260  | 1.49510   |
| C | 4.91840  | 22.36090  | 2.22650   |
| C | 4.97010  | 22.32260  | 3.62260   |
| C | 4.92220  | 21.09550  | 4.31390   |
| C | 4.83960  | 19.93720  | 3.55310   |
| C | 4.78710  | 19.92360  | 2.15010   |
| H | 4.95140  | 23.31040  | 1.71200   |
| H | 4.80770  | 18.97160  | 4.04770   |
| C | 0.27060  | 21.86400  | 10.26290  |
| C | 0.67210  | 20.54440  | 9.96710   |
| C | 1.85260  | 20.38710  | 9.22430   |
| C | 2.62690  | 21.44590  | 8.76980   |
| C | 2.19730  | 22.74860  | 9.09210   |
| C | 1.03050  | 22.95560  | 9.83250   |
| H | 2.15400  | 19.36800  | 9.00320   |
| H | 0.71490  | 23.96090  | 10.07130  |
| C | 10.09120 | 20.57950  | 9.84410   |
| C | 9.61840  | 21.83910  | 9.46300   |
| C | 8.38230  | 21.95940  | 8.82140   |
| C | 7.59970  | 20.82080  | 8.54590   |
| C | 8.09750  | 19.58900  | 8.94790   |
| C | 9.32950  | 19.41830  | 9.59710   |
| H | 10.20870 | 22.72120  | 9.66500   |
| H | 7.51690  | 18.69060  | 8.76510   |
| C | 2.44710  | 21.38010  | 5.88030   |
| H | 2.11390  | 22.42430  | 5.93870   |
| H | 2.48880  | 21.10220  | 4.82560   |
| H | 1.67660  | 20.77070  | 6.36220   |
| C | 5.14940  | 21.16040  | 10.13500  |
| H | 4.43070  | 20.46580  | 10.58240  |
| H | 6.13920  | 20.91600  | 10.52320  |
| H | 4.88520  | 22.16520  | 10.49020  |
| C | 7.46980  | 20.80570  | 5.60950   |

|   |           |          |          |
|---|-----------|----------|----------|
| H | 8.35040   | 20.61910 | 6.22440  |
| H | 7.38430   | 19.98830 | 4.88560  |
| H | 7.64610   | 21.72340 | 5.03360  |
| O | -0.88410  | 22.04890 | 10.98870 |
| C | -1.30980  | 23.36490 | 11.31270 |
| H | -2.23190  | 23.24700 | 11.88510 |
| H | -0.56540  | 23.88490 | 11.92810 |
| H | -1.51560  | 23.95390 | 10.41000 |
| O | 11.30670  | 20.44090 | 10.47430 |
| O | 4.76790   | 21.19160 | 0.12000  |
| C | 4.80500   | 22.43310 | -0.56930 |
| H | 3.95320   | 23.06860 | -0.29660 |
| H | 5.74100   | 22.97080 | -0.37380 |
| H | 4.74600   | 22.18580 | -1.63100 |
| C | 12.08900  | 21.59250 | 10.75590 |
| H | 12.37550  | 22.11760 | 9.83600  |
| H | 11.55720  | 22.28300 | 11.42190 |
| H | 12.98680  | 21.22660 | 11.25780 |
| O | 2.98210   | 23.76690 | 8.64080  |
| O | 5.06700   | 23.44020 | 4.39460  |
| O | 7.86080   | 23.15320 | 8.42650  |
| C | 5.11970   | 24.70920 | 3.76860  |
| H | 4.21040   | 24.91370 | 3.18700  |
| H | 5.99580   | 24.80270 | 3.11240  |
| H | 5.19900   | 25.43700 | 4.57890  |
| C | 2.61540   | 25.10240 | 8.93580  |
| H | 3.38690   | 25.72910 | 8.48360  |
| H | 1.63960   | 25.36140 | 8.50260  |
| H | 2.58920   | 25.28680 | 10.01850 |
| C | 8.58540   | 24.34160 | 8.68490  |
| H | 7.97140   | 25.15510 | 8.29280  |
| H | 9.55770   | 24.34440 | 8.17350  |
| H | 8.74350   | 24.49460 | 9.76130  |
| C | 9.65160   | 17.99080 | 9.95440  |
| O | 8.84720   | 17.08630 | 9.79130  |
| N | 10.92150  | 17.78360 | 10.45810 |
| H | 11.53830  | 18.58370 | 10.58080 |
| N | 11.32780  | 16.54890 | 10.82360 |
| C | 4.70790   | 18.54550 | 1.54310  |
| O | 4.76850   | 17.53510 | 2.22700  |
| N | 4.48400   | 17.33620 | -0.49270 |
| H | 4.51680   | 19.39160 | -0.34120 |
| N | 4.55100   | 18.51230 | 0.17030  |
| C | -0.00330  | 19.25210 | 10.34680 |
| O | 0.51200   | 18.16570 | 10.13140 |
| N | -1.24940  | 19.39240 | 10.92720 |
| H | -1.60850  | 20.33010 | 11.09340 |
| N | -1.96310  | 18.31500 | 11.31470 |
| C | -3.11230  | 18.55080 | 11.84000 |
| C | -10.84690 | 8.92180  | 15.67450 |



|   |           |           |          |
|---|-----------|-----------|----------|
| C | -11.28290 | 10.25690  | 15.67800 |
| C | -10.44270 | 11.28820  | 15.27780 |
| C | -8.69030  | 9.70020   | 14.83990 |
| C | -9.53020  | 8.67010   | 15.24870 |
| H | -12.30660 | 10.48740  | 15.95980 |
| H | -10.82340 | 12.30590  | 15.25710 |
| H | -7.66910  | 9.47210   | 14.54680 |
| H | -9.14700  | 7.65390   | 15.26900 |
| C | 12.52790  | 16.45120  | 11.27310 |
| C | 17.46980  | 5.16260   | 15.20350 |
| C | 17.24420  | 6.20810   | 16.11320 |
| C | 16.70880  | 7.42110   | 15.69560 |
| C | 16.38230  | 7.64640   | 14.34820 |
| C | 16.60800  | 6.59940   | 13.43940 |
| C | 17.13620  | 5.38420   | 13.85770 |
| H | 17.45310  | 6.05240   | 17.16840 |
| H | 16.50590  | 8.19330   | 16.43270 |
| H | 16.39960  | 6.75170   | 12.38400 |
| H | 17.32780  | 4.60600   | 13.12400 |
| C | 4.33740   | 17.40860  | -1.76750 |
| C | 3.93300   | 6.85870   | -9.21700 |
| C | 2.87800   | 7.13440   | -8.33210 |
| C | 2.90170   | 8.25590   | -7.51300 |
| C | 5.04200   | 8.86930   | -8.41810 |
| C | 5.01650   | 7.74980   | -9.24050 |
| H | 2.01070   | 6.48050   | -8.31450 |
| H | 2.05140   | 8.46210   | -6.87010 |
| H | 5.91380   | 9.51770   | -8.42980 |
| H | 5.86740   | 7.54070   | -9.88200 |
| H | 4.26600   | 18.37710  | -2.28550 |
| H | -3.49140  | 19.57690  | 11.96050 |
| H | 13.18750  | 17.32900  | 11.34820 |
| C | 18.39660  | -8.75310  | 18.44780 |
| C | 19.30530  | -8.28340  | 17.48670 |
| C | 19.62540  | -9.05250  | 16.35220 |
| C | 19.01880  | -10.30750 | 16.18940 |
| C | 18.10270  | -10.79710 | 17.14310 |
| C | 17.79480  | -10.01570 | 18.27010 |
| C | 21.24610  | -4.47690  | 18.10680 |
| C | 21.80540  | -5.64540  | 18.63270 |
| C | 21.17750  | -6.87660  | 18.42580 |
| C | 19.97940  | -6.96240  | 17.69020 |
| C | 19.46240  | -5.78350  | 17.17130 |
| C | 20.05430  | -4.52410  | 17.35370 |
| H | 22.72290  | -5.59620  | 19.20140 |
| H | 18.54550  | -5.80870  | 16.59080 |
| C | 15.08610  | -11.53040 | 21.27750 |
| C | 14.55910  | -10.84040 | 20.16640 |
| C | 15.47660  | -10.36620 | 19.21460 |
| C | 16.85120  | -10.54000 | 19.30990 |

|   |          |           |          |
|---|----------|-----------|----------|
| C | 17.33880 | -11.23820 | 20.43330 |
| C | 16.46450 | -11.72870 | 21.40750 |
| H | 15.06070 | -9.84040  | 18.36120 |
| H | 16.85470 | -12.26160 | 22.26260 |
| C | 20.03790 | -12.75070 | 12.77710 |
| C | 20.74190 | -12.89280 | 13.97680 |
| C | 20.40800 | -12.10520 | 15.08230 |
| C | 19.36600 | -11.15950 | 15.00800 |
| C | 18.69370 | -11.04420 | 13.79910 |
| C | 18.99200 | -11.81230 | 12.66310 |
| H | 21.54500 | -13.61200 | 14.04970 |
| H | 17.89470 | -10.31670 | 13.69640 |
| O | 14.20940 | -12.00680 | 22.22520 |
| O | 20.34980 | -13.51490 | 11.67610 |
| O | 21.84440 | -3.25360  | 18.30640 |
| O | 18.68910 | -11.39580 | 20.49930 |
| O | 21.66630 | -8.05300  | 18.90890 |
| O | 21.05300 | -12.19170 | 16.27880 |
| C | 18.14670 | -11.49530 | 11.45850 |
| O | 17.36130 | -10.56070 | 11.45100 |
| N | 18.30860 | -12.34520 | 10.38050 |
| H | 18.99540 | -13.09360 | 10.44340 |
| N | 17.61540 | -12.15040 | 9.24010  |
| C | 19.31040 | -3.38650  | 16.70400 |
| O | 18.35090 | -3.57560  | 15.97220 |
| N | 19.18190 | -1.01960  | 16.52170 |
| H | 20.57770 | -2.03880  | 17.64210 |
| N | 19.77640 | -2.12510  | 17.02050 |
| C | 13.11570 | -10.55290 | 19.84030 |
| O | 12.78580 | -10.04050 | 18.78230 |
| N | 12.20400 | -10.89450 | 20.82180 |
| H | 12.54240 | -11.34170 | 21.67100 |
| N | 10.87840 | -10.71730 | 20.63160 |
| C | 10.11030 | -11.09540 | 21.58980 |
| C | 5.84850  | -10.74960 | 21.35130 |
| C | 6.46620  | -11.28610 | 22.49050 |
| C | 7.85070  | -11.39370 | 22.56330 |
| C | 8.66030  | -10.96970 | 21.49970 |
| C | 8.04690  | -10.43370 | 20.35420 |
| C | 6.66850  | -10.32830 | 20.28670 |
| H | 5.85820  | -11.59390 | 23.33700 |
| H | 8.31300  | -11.80250 | 23.46000 |
| H | 8.67190  | -10.11590 | 19.52550 |
| H | 6.20930  | -9.93930  | 19.38230 |
| C | 17.82810 | -12.98560 | 8.28710  |
| C | 15.80720 | -12.70100 | 4.51530  |
| C | 16.71580 | -13.73850 | 4.77460  |
| C | 17.37030 | -13.82300 | 5.99880  |
| C | 17.13820 | -12.87480 | 7.00600  |
| C | 16.23350 | -11.82980 | 6.75090  |

|   |           |           |          |
|---|-----------|-----------|----------|
| C | 15.58520  | -11.74900 | 5.52980  |
| H | 16.88850  | -14.50250 | 4.02140  |
| H | 18.06150  | -14.64360 | 6.18290  |
| H | 16.06000  | -11.08670 | 7.52310  |
| H | 14.91180  | -10.91770 | 5.34140  |
| C | 19.64090  | 0.10810   | 16.93300 |
| C | 18.03140  | 3.86720   | 15.64430 |
| C | 17.57800  | 2.65870   | 15.08140 |
| C | 18.09050  | 1.43670   | 15.48740 |
| C | 19.08860  | 1.37910   | 16.47560 |
| C | 19.54970  | 2.57960   | 17.03570 |
| C | 19.02640  | 3.80230   | 16.63030 |
| H | 16.78970  | 2.68350   | 14.33430 |
| H | 17.72410  | 0.50920   | 15.05830 |
| H | 20.32870  | 2.55340   | 17.79580 |
| H | 19.41270  | 4.72050   | 17.06260 |
| H | 20.46490  | 0.16230   | 17.66070 |
| H | 10.51550  | -11.53380 | 22.51420 |
| H | 18.53670  | -13.82020 | 8.39900  |
| C | -16.89820 | -4.04850  | 15.85530 |
| C | -16.37340 | -3.56820  | 17.07460 |
| C | -15.65120 | -4.41290  | 17.92950 |
| C | -15.45080 | -5.76010  | 17.55990 |
| C | -15.96560 | -6.25380  | 16.35310 |
| C | -16.68990 | -5.38940  | 15.50330 |
| C | -17.12930 | 0.54510   | 18.15600 |
| C | -18.00690 | -0.46170  | 18.56940 |
| C | -17.76320 | -1.79240  | 18.21730 |
| C | -16.63240 | -2.14190  | 17.45250 |
| C | -15.79320 | -1.11300  | 17.04830 |
| C | -15.99790 | 0.23710   | 17.37230 |
| H | -18.87520 | -0.21110  | 19.16140 |
| H | -14.91890 | -1.33920  | 16.44620 |
| C | -18.36840 | -6.99700  | 11.86110 |
| C | -17.07850 | -6.42860  | 11.82780 |
| C | -16.57570 | -5.91430  | 13.03380 |
| C | -17.26970 | -5.94060  | 14.23620 |
| C | -18.55500 | -6.51840  | 14.22850 |
| C | -19.10030 | -7.03850  | 13.05150 |
| H | -15.58570 | -5.47100  | 12.99510 |
| H | -20.08880 | -7.47430  | 13.06190 |
| C | -13.35090 | -8.35330  | 20.30630 |
| C | -14.74540 | -8.25790  | 20.35410 |
| C | -15.42140 | -7.41730  | 19.46510 |
| C | -14.71710 | -6.66240  | 18.50520 |
| C | -13.33290 | -6.77240  | 18.49960 |
| C | -12.60930 | -7.59900  | 19.37430 |
| H | -15.30170 | -8.83340  | 21.07990 |
| H | -12.75150 | -6.19490  | 17.78790 |
| C | -17.69920 | -3.11530  | 14.97000 |

|   |           |           |          |
|---|-----------|-----------|----------|
| H | -17.97940 | -3.59070  | 14.02870 |
| H | -18.61950 | -2.79500  | 15.47550 |
| H | -17.13520 | -2.20650  | 14.73340 |
| C | -15.78400 | -7.70380  | 15.95790 |
| H | -15.40720 | -7.79490  | 14.93370 |
| H | -15.08590 | -8.21430  | 16.62210 |
| H | -16.74160 | -8.23930  | 15.99610 |
| C | -15.10960 | -3.91430  | 19.25320 |
| H | -14.03940 | -4.12410  | 19.35310 |
| H | -15.25360 | -2.83910  | 19.36440 |
| H | -15.61180 | -4.41290  | 20.09240 |
| O | -18.88830 | -7.50390  | 10.69270 |
| C | -20.19700 | -8.05520  | 10.68320 |
| H | -20.37870 | -8.37160  | 9.65420  |
| H | -20.27140 | -8.92460  | 11.34840 |
| H | -20.94690 | -7.30800  | 10.97060 |
| O | -12.66550 | -9.17780  | 21.16890 |
| O | -17.34880 | 1.86020   | 18.49740 |
| C | -18.47990 | 2.20470   | 19.28450 |
| H | -19.41550 | 1.94660   | 18.77330 |
| H | -18.45010 | 1.71410   | 20.26550 |
| H | -18.42940 | 3.28680   | 19.41980 |
| C | -13.38240 | -9.94690  | 22.12390 |
| H | -13.93820 | -9.30430  | 22.81780 |
| H | -14.07420 | -10.64640 | 21.63790 |
| H | -12.62940 | -10.50990 | 22.67860 |
| O | -19.21320 | -6.53180  | 15.42080 |
| O | -18.58120 | -2.81910  | 18.57950 |
| O | -16.77500 | -7.27020  | 19.46380 |
| C | -19.73450 | -2.54090  | 19.35250 |
| H | -20.42450 | -1.86760  | 18.82550 |
| H | -19.47500 | -2.10130  | 20.32540 |
| H | -20.22440 | -3.50360  | 19.51270 |
| C | -20.52530 | -7.06100  | 15.47700 |
| H | -20.84690 | -6.94890  | 16.51440 |
| H | -21.21350 | -6.50790  | 14.82330 |
| H | -20.54710 | -8.12520  | 15.20520 |
| C | -17.54890 | -7.99100  | 20.40490 |
| H | -18.58610 | -7.70620  | 20.21650 |
| H | -17.28310 | -7.72600  | 21.43750 |
| H | -17.44240 | -9.07640  | 20.27240 |
| C | -11.11380 | -7.53580  | 19.19780 |
| O | -10.58960 | -6.72560  | 18.44980 |
| N | -10.38820 | -8.46400  | 19.92080 |
| H | -10.88520 | -9.10700  | 20.53360 |
| N | -9.03760  | -8.48390  | 19.87090 |
| C | -14.96290 | 1.17590   | 16.81080 |
| O | -14.09420 | 0.79440   | 16.04160 |
| N | -14.18870 | 3.41910   | 16.80360 |
| H | -15.81010 | 2.74090   | 17.88010 |

|   |           |           |          |
|---|-----------|-----------|----------|
| N | -15.05850 | 2.48550   | 17.24320 |
| C | -16.14590 | -6.28660  | 10.65260 |
| O | -15.09300 | -5.67460  | 10.73890 |
| N | -16.55290 | -6.91300  | 9.48930  |
| H | -17.45020 | -7.39330  | 9.47870  |
| N | -15.79110 | -6.86910  | 8.37450  |
| C | -16.24610 | -7.49160  | 7.34660  |
| C | -9.66870  | -8.06890  | -3.75990 |
| C | -10.88950 | -7.38160  | -3.68380 |
| C | -11.58930 | -7.29220  | -2.48740 |
| C | -9.87670  | -8.57360  | -1.39070 |
| C | -9.17320  | -8.65740  | -2.58560 |
| H | -11.27370 | -6.87700  | -4.56510 |
| H | -12.51060 | -6.71750  | -2.45140 |
| H | -9.48800  | -9.07720  | -0.51090 |
| H | -8.24460  | -9.22070  | -2.61960 |
| C | -8.45810  | -9.39840  | 20.56290 |
| C | 4.38040   | -10.61830 | 21.25460 |
| C | 3.51840   | -11.57300 | 21.81520 |
| C | 2.13940   | -11.44240 | 21.70770 |
| C | 1.56310   | -10.35260 | 21.03570 |
| C | 2.42600   | -9.39880  | 20.47460 |
| C | 3.80380   | -9.52830  | 20.58210 |
| H | 3.93520   | -12.43800 | 22.32430 |
| H | 1.49630   | -12.18790 | 22.16730 |
| H | 2.01310   | -8.55440  | 19.93120 |
| H | 4.44500   | -8.76360  | 20.15280 |
| C | -14.32760 | 4.60720   | 17.27350 |
| C | -11.74190 | 7.82050   | 16.09080 |
| C | -12.74370 | 8.01240   | 17.05500 |
| C | -13.58310 | 6.96920   | 17.43130 |
| C | -12.44260 | 5.49480   | 15.89730 |
| C | -11.61450 | 6.53870   | 15.52080 |
| H | -12.85090 | 8.98110   | 17.53520 |
| H | -14.34810 | 7.14130   | 18.18640 |
| H | -12.33930 | 4.51250   | 15.44740 |
| H | -10.86920 | 6.36970   | 14.74920 |
| H | -15.11230 | 4.85130   | 18.00540 |
| H | -17.20390 | -8.03250  | 7.37760  |
| H | -9.03590  | -10.12900 | 21.14900 |
| C | -13.44470 | 5.69480   | 16.86290 |
| C | -1.89690  | -8.81830  | 20.88650 |
| C | -0.51580  | -8.94750  | 20.96000 |
| C | 0.09560   | -10.21110 | 20.93410 |
| C | -0.73450  | -11.33730 | 20.82090 |
| C | -2.11540  | -11.20780 | 20.75190 |
| H | -2.34200  | -7.82990  | 20.94720 |
| H | 0.09610   | -8.05750  | 21.07870 |
| H | -0.28990  | -12.32560 | 20.74870 |
| H | -2.72780  | -12.09570 | 20.62830 |

|   |           |           |          |
|---|-----------|-----------|----------|
| C | 14.39100  | 10.22640  | 12.41070 |
| C | 14.90820  | 9.00950   | 12.83700 |
| C | 15.82500  | 8.94160   | 13.89850 |
| C | 16.19910  | 10.14750  | 14.51360 |
| C | 15.67980  | 11.36470  | 14.08900 |
| H | 13.69750  | 10.24450  | 11.57460 |
| H | 14.58120  | 8.09500   | 12.34970 |
| H | 16.91980  | 10.13260  | 15.32660 |
| H | 15.97390  | 12.27630  | 14.60250 |
| C | 10.96620  | -12.32000 | -1.85640 |
| C | 11.62770  | -12.41960 | -0.63880 |
| C | 13.01830  | -12.24440 | -0.55180 |
| C | 13.71620  | -11.96040 | -1.73730 |
| C | 13.05600  | -11.86740 | -2.95610 |
| H | 9.89430   | -12.49350 | -1.89620 |
| H | 11.06150  | -12.67250 | 0.25340  |
| H | 14.78570  | -11.77290 | -1.69700 |
| H | 13.61890  | -11.61160 | -3.84990 |
| C | 3.98240   | 9.15060   | -7.54000 |
| C | 4.61690   | 12.69330  | -6.37290 |
| C | 4.58620   | 11.54780  | -7.15690 |
| C | 4.00150   | 10.35990  | -6.68910 |
| C | 3.43910   | 10.36710  | -5.40120 |
| C | 3.47150   | 11.51480  | -4.61700 |
| H | 5.09800   | 13.58920  | -6.75610 |
| H | 5.00950   | 11.57660  | -8.15710 |
| H | 2.99230   | 9.46020   | -5.00300 |
| H | 3.01840   | 11.49670  | -3.62960 |
| C | -11.10200 | -7.89270  | -1.31550 |
| C | -11.93420 | -7.70570  | 2.37760  |
| C | -11.21190 | -7.76180  | 1.19250  |
| C | -11.86280 | -7.82210  | -0.04980 |
| C | -13.26700 | -7.82300  | -0.05310 |
| C | -13.98960 | -7.76560  | 1.13190  |
| H | -11.40130 | -7.67860  | 3.32390  |
| H | -10.12600 | -7.74080  | 1.23010  |
| H | -13.79920 | -7.88720  | -0.99810 |
| H | -15.07550 | -7.74760  | 1.09340  |
| C | -9.12950  | 11.03520  | 14.84900 |
| C | -6.52600  | 13.03880  | 12.96070 |
| C | -7.33900  | 11.98810  | 13.36620 |
| C | -8.25050  | 12.14460  | 14.42170 |
| C | -8.30930  | 13.39720  | 15.05460 |
| C | -7.49190  | 14.44650  | 14.65260 |
| H | -5.86070  | 12.89660  | 12.11410 |
| H | -7.29410  | 11.04260  | 12.83230 |
| H | -8.97800  | 13.53730  | 15.89970 |
| H | -7.53370  | 15.38920  | 15.19170 |
| C | 4.06290   | 12.70120  | -5.08360 |
| C | 4.26010   | 16.21130  | -2.59740 |

|   |           |           |          |
|---|-----------|-----------|----------|
| C | 4.35690   | 14.92640  | -2.03610 |
| C | 4.28670   | 13.80360  | -2.84370 |
| C | 4.11860   | 13.91250  | -4.23760 |
| C | 4.02210   | 15.19810  | -4.79150 |
| C | 4.09180   | 16.32850  | -3.98490 |
| H | 4.49890   | 14.83380  | -0.96400 |
| H | 4.39560   | 12.82020  | -2.39530 |
| H | 3.86550   | 15.31240  | -5.86080 |
| H | 4.00580   | 17.31620  | -4.43460 |
| C | -6.58040  | 14.29120  | 13.59590 |
| C | -3.97900  | 17.47020  | 12.29710 |
| C | -5.24750  | 17.75810  | 12.82230 |
| C | -6.09230  | 16.73750  | 13.24640 |
| C | -5.69440  | 15.39430  | 13.16510 |
| C | -4.41340  | 15.11600  | 12.64890 |
| C | -3.57130  | 16.12750  | 12.21960 |
| H | -5.58120  | 18.79250  | 12.88400 |
| H | -7.08360  | 16.98380  | 13.61730 |
| H | -4.06730  | 14.08760  | 12.60830 |
| H | -2.58520  | 15.90230  | 11.82600 |
| C | 14.76360  | 11.43240  | 13.02750 |
| C | 13.08270  | 15.17460  | 11.71090 |
| C | 14.40210  | 15.11100  | 12.18280 |
| C | 14.95030  | 13.90600  | 12.60870 |
| C | 14.19700  | 12.72250  | 12.57770 |
| C | 12.87240  | 12.79530  | 12.10350 |
| C | 12.32220  | 13.99300  | 11.67760 |
| H | 15.00790  | 16.01510  | 12.20570 |
| H | 15.98380  | 13.87670  | 12.94330 |
| H | 12.25860  | 11.89900  | 12.09830 |
| H | 11.29710  | 14.04010  | 11.32360 |
| C | -13.33920 | -7.70620  | 2.37430  |
| C | -15.51200 | -7.52450  | 6.08670  |
| C | -16.01700 | -8.25300  | 5.00000  |
| C | -15.32210 | -8.31180  | 3.79680  |
| C | -14.09930 | -7.64170  | 3.64080  |
| C | -13.60440 | -6.90380  | 4.73400  |
| C | -14.29200 | -6.84340  | 5.93430  |
| H | -16.95690 | -8.79200  | 5.10540  |
| H | -15.71600 | -8.90930  | 2.97910  |
| H | -12.67660 | -6.34930  | 4.62590  |
| H | -13.90570 | -6.26810  | 6.76980  |
| C | -2.72750  | -9.94570  | 20.78830 |
| C | -7.00560  | -9.52370  | 20.60840 |
| C | -6.42090  | -10.58550 | 21.31380 |
| C | -5.03920  | -10.72770 | 21.36850 |
| C | -4.19750  | -9.80760  | 20.72600 |
| C | -4.79130  | -8.74250  | 20.02220 |
| C | -6.16790  | -8.60060  | 19.95900 |
| H | -7.05760  | -11.30240 | 21.82930 |

|   |          |           |          |
|---|----------|-----------|----------|
| H | -4.60480 | -11.54340 | 21.94020 |
| H | -4.15750 | -8.03460  | 19.49540 |
| H | -6.61990 | -7.78420  | 19.40440 |
| C | 11.66650 | -12.04690 | -3.04270 |
| C | 9.59590  | -11.71300 | -6.80170 |
| C | 10.86440 | -12.30790 | -6.73570 |
| C | 11.53790 | -12.41590 | -5.52400 |
| C | 10.96020 | -11.94100 | -4.33720 |
| C | 9.68240  | -11.35380 | -4.40940 |
| C | 9.01100  | -11.23670 | -5.61550 |
| H | 11.32580 | -12.69070 | -7.64430 |
| H | 12.51160 | -12.89740 | -5.49120 |
| H | 9.22670  | -10.95740 | -3.50630 |
| H | 8.03330  | -10.76780 | -5.66640 |
| C | 18.10660 | -7.91210  | 19.67430 |
| H | 17.23660 | -8.27920  | 20.22110 |
| H | 18.96370 | -7.92330  | 20.36070 |
| H | 17.92320 | -6.86670  | 19.40700 |
| C | 17.49290 | -12.16980 | 16.94090 |
| H | 16.72460 | -12.38850 | 17.68400 |
| H | 17.03830 | -12.25990 | 15.94840 |
| H | 18.26330 | -12.94870 | 17.01070 |
| C | 20.63740 | -8.52230  | 15.35650 |
| H | 20.72420 | -9.16710  | 14.48070 |
| H | 20.36820 | -7.51840  | 15.01070 |
| H | 21.62990 | -8.44310  | 15.81910 |
| C | 14.70430 | -12.73030 | 23.34250 |
| H | 13.82670 | -13.00530 | 23.93090 |
| H | 15.22980 | -13.64040 | 23.02760 |
| H | 15.37330 | -12.11350 | 23.95540 |
| C | 19.24840 | -12.10270 | 21.59080 |
| H | 20.32720 | -12.10570 | 21.42120 |
| H | 19.03470 | -11.60820 | 22.54830 |
| H | 18.88610 | -13.13910 | 21.63160 |
| C | 23.05250 | -3.17240  | 19.04920 |
| H | 23.32180 | -2.11460  | 19.06430 |
| H | 22.91590 | -3.52700  | 20.07860 |
| H | 23.85580 | -3.74390  | 18.56800 |
| C | 22.87380 | -8.04370  | 19.64890 |
| H | 23.06650 | -9.08460  | 19.91690 |
| H | 23.71340 | -7.66320  | 19.05130 |
| H | 22.78410 | -7.44510  | 20.56590 |
| C | 21.42870 | -14.43620 | 11.74090 |
| H | 21.48550 | -14.89750 | 10.75300 |
| H | 22.37550 | -13.92660 | 11.95830 |
| H | 21.24830 | -15.21320 | 12.49420 |
| C | 22.14980 | -13.07790 | 16.40750 |
| H | 22.51310 | -12.95440 | 17.42970 |
| H | 21.84890 | -14.12350 | 16.25530 |
| H | 22.95610 | -12.82860 | 15.70410 |



## V. $^1\text{H}$ , $^{13}\text{C}$ ( $^1\text{H}$ ), and $^1\text{H}$ DOSY NMR Spectra

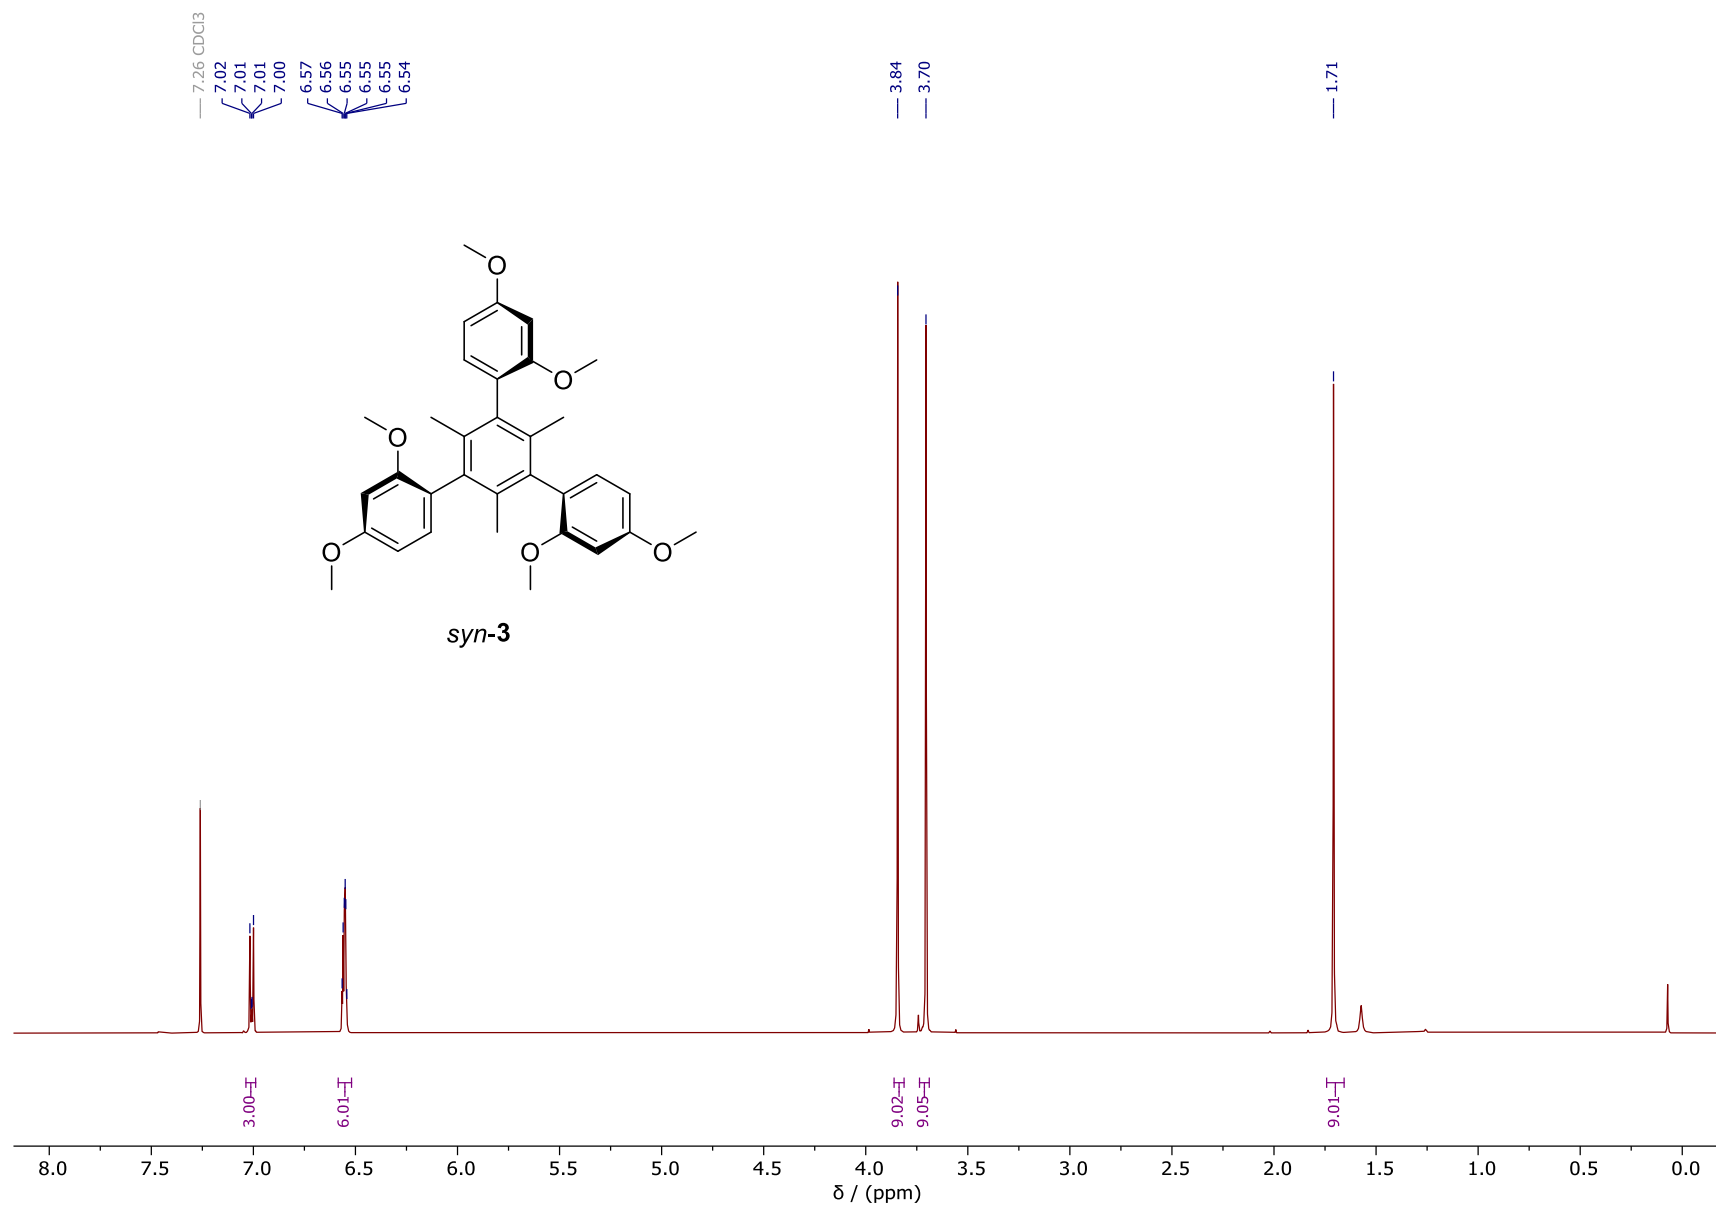

**Figure S1.**  $^1\text{H}$  NMR spectrum (500 MHz,  $\text{CDCl}_3$ , 298 K) of *syn-3*.

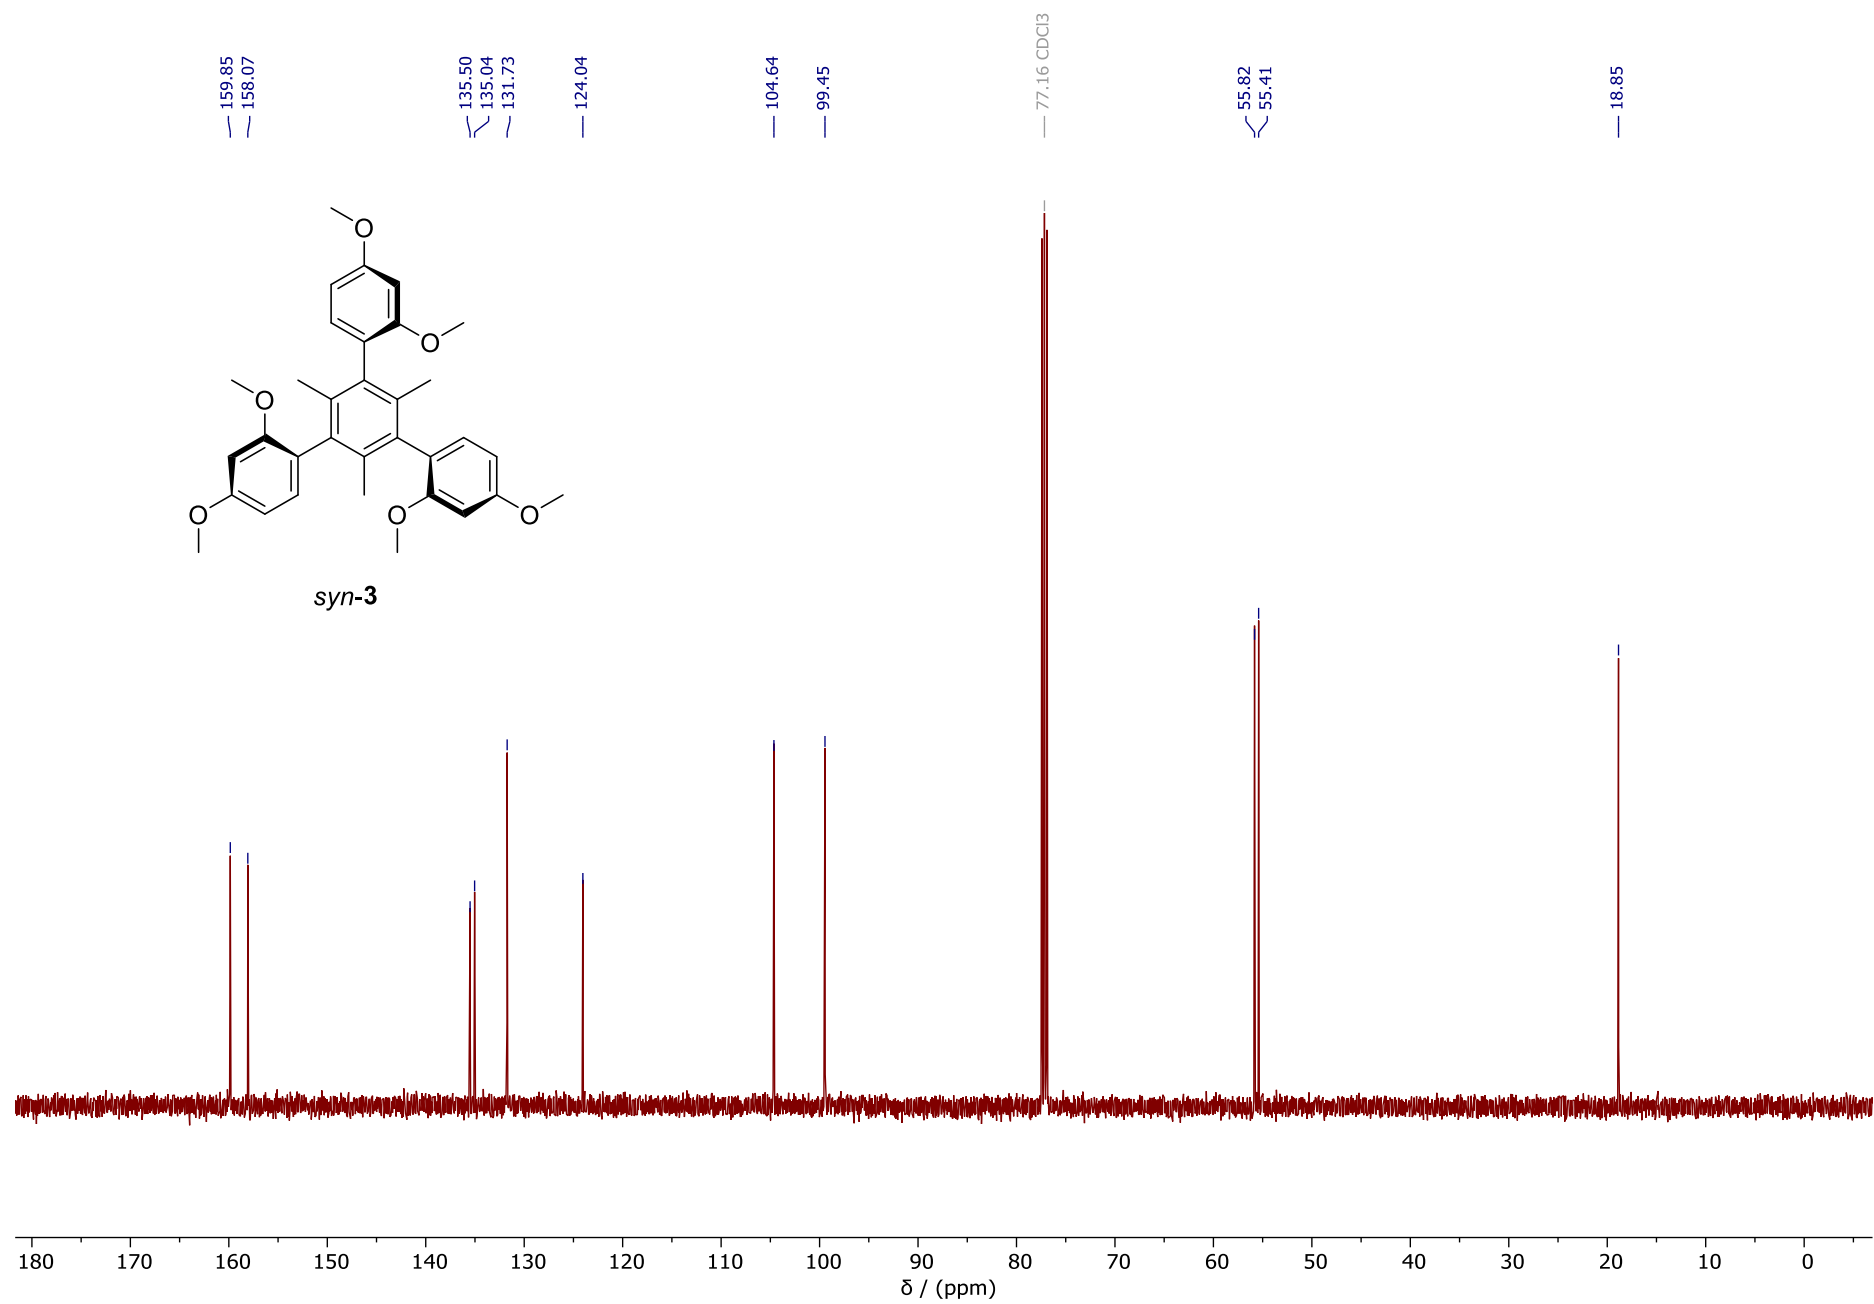

**Figure S2.**  $^{13}\text{C}$  ( $^1\text{H}$ ) NMR spectrum (125 MHz,  $\text{CDCl}_3$ , 298 K) of *syn-3*.

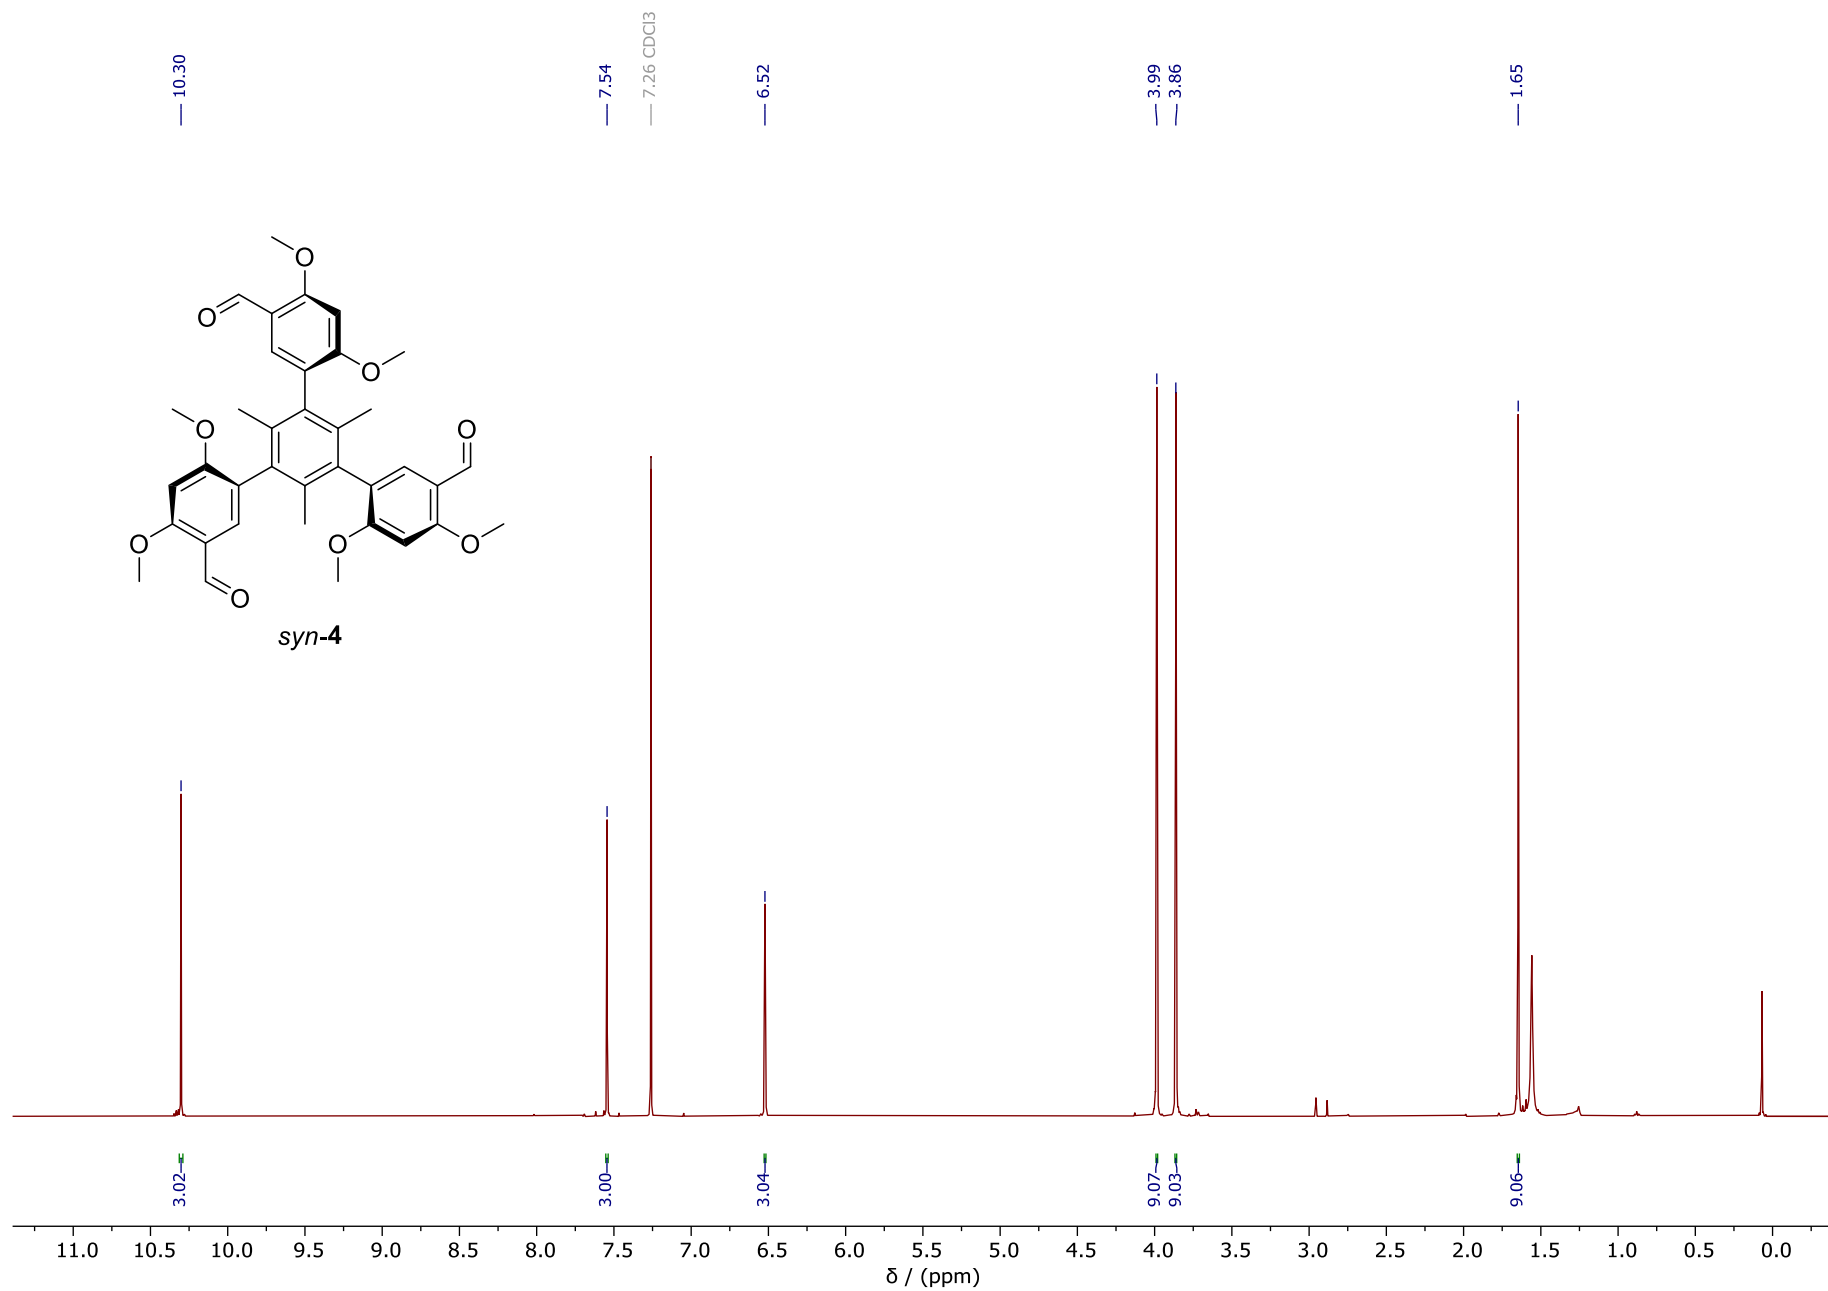

**Figure S3.** <sup>1</sup>H NMR spectrum (500 MHz, CDCl<sub>3</sub>, 298 K) of *syn-4*.

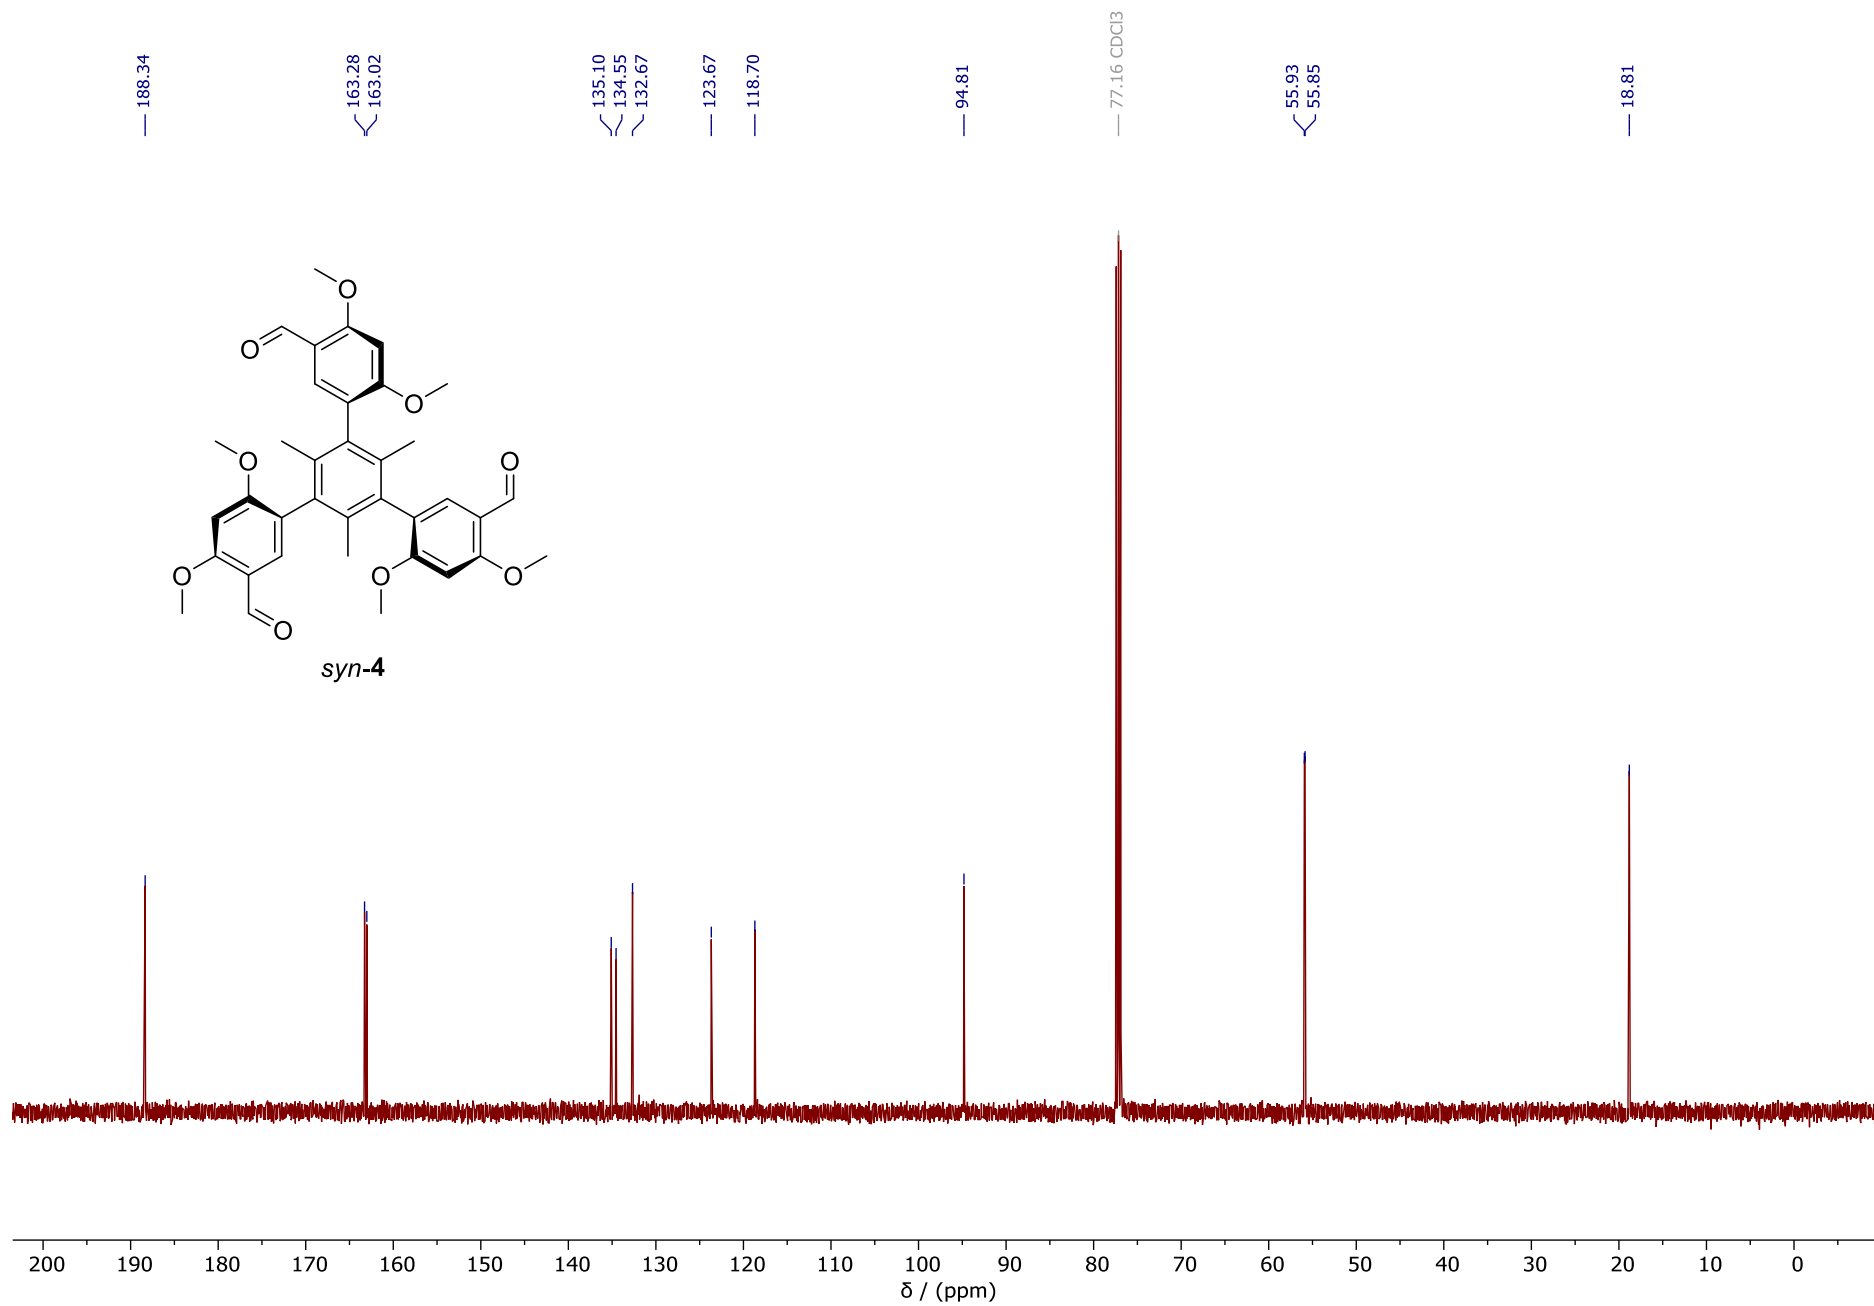

**Figure S4.**  $^{13}\text{C}$  ( $^1\text{H}$ ) NMR spectrum (125 MHz,  $\text{CDCl}_3$ , 298 K) of *syn-4*.

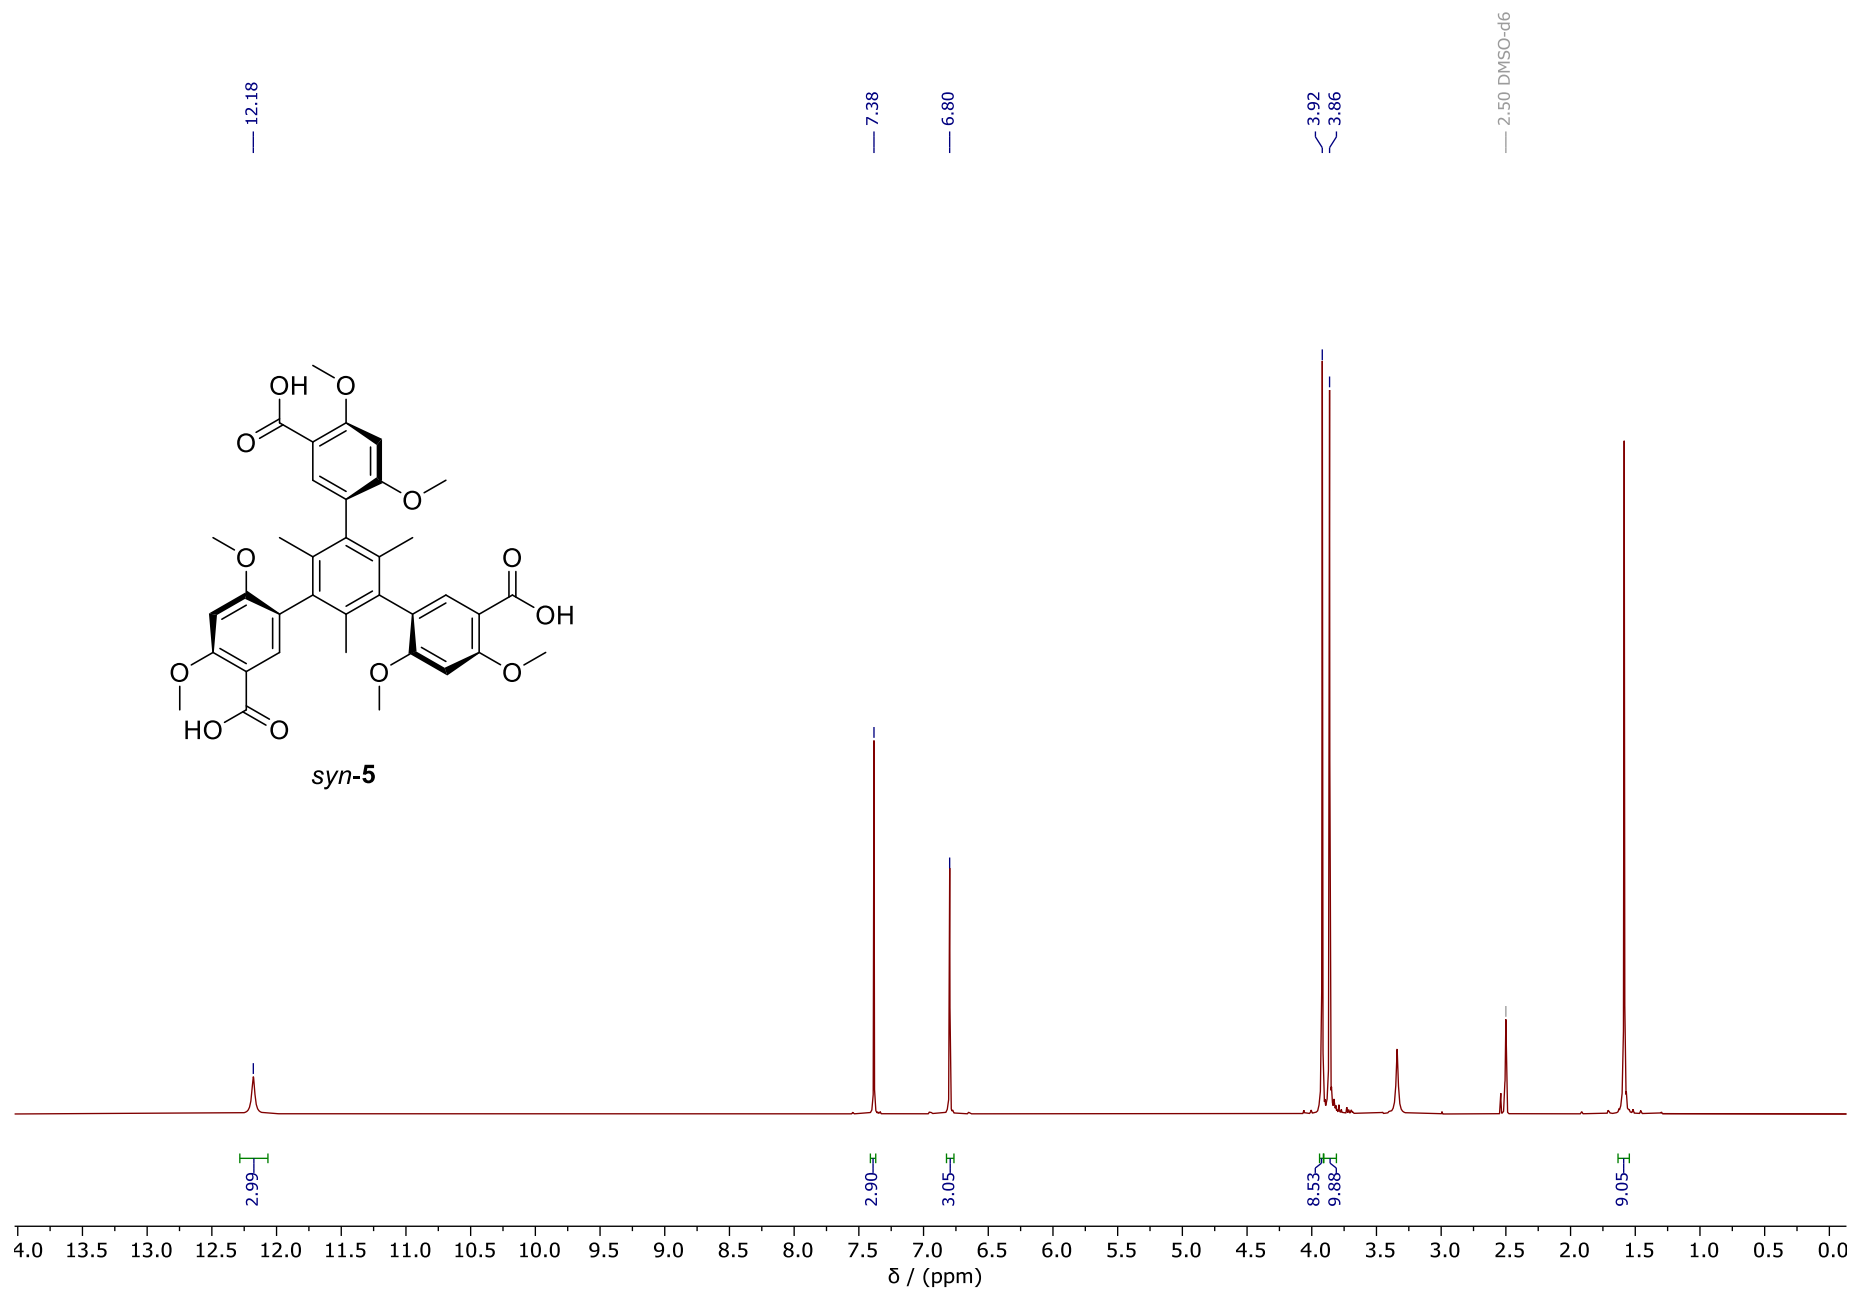

**Figure S5.** <sup>1</sup>H NMR spectrum (500 MHz, DMSO-d<sub>6</sub>, 298 K) of *syn-5*.

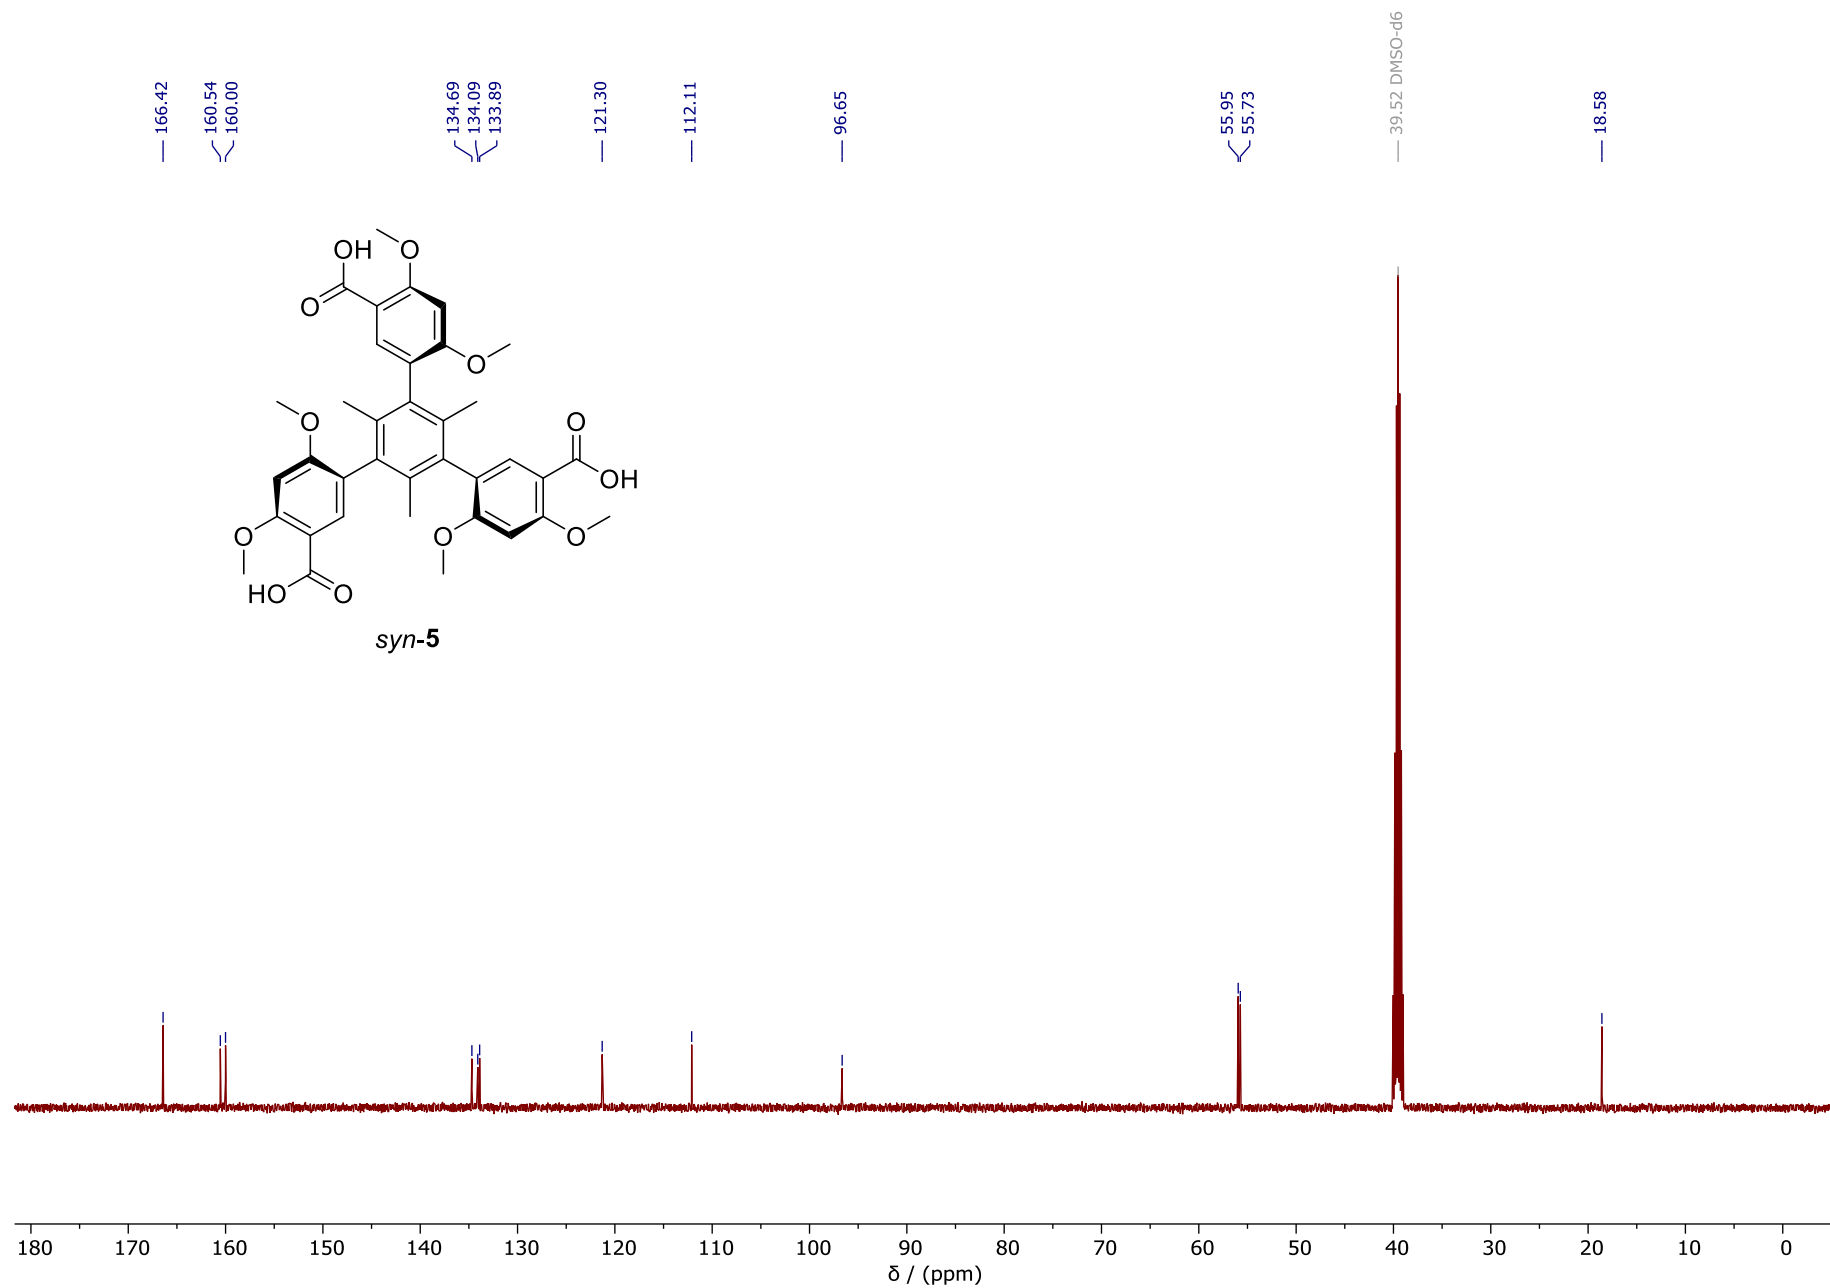

Figure S6.  $^{13}\text{C}$  ( $^1\text{H}$ ) NMR spectrum (125 MHz,  $\text{DMSO-d}_6$ , 298 K) of *syn-5*.

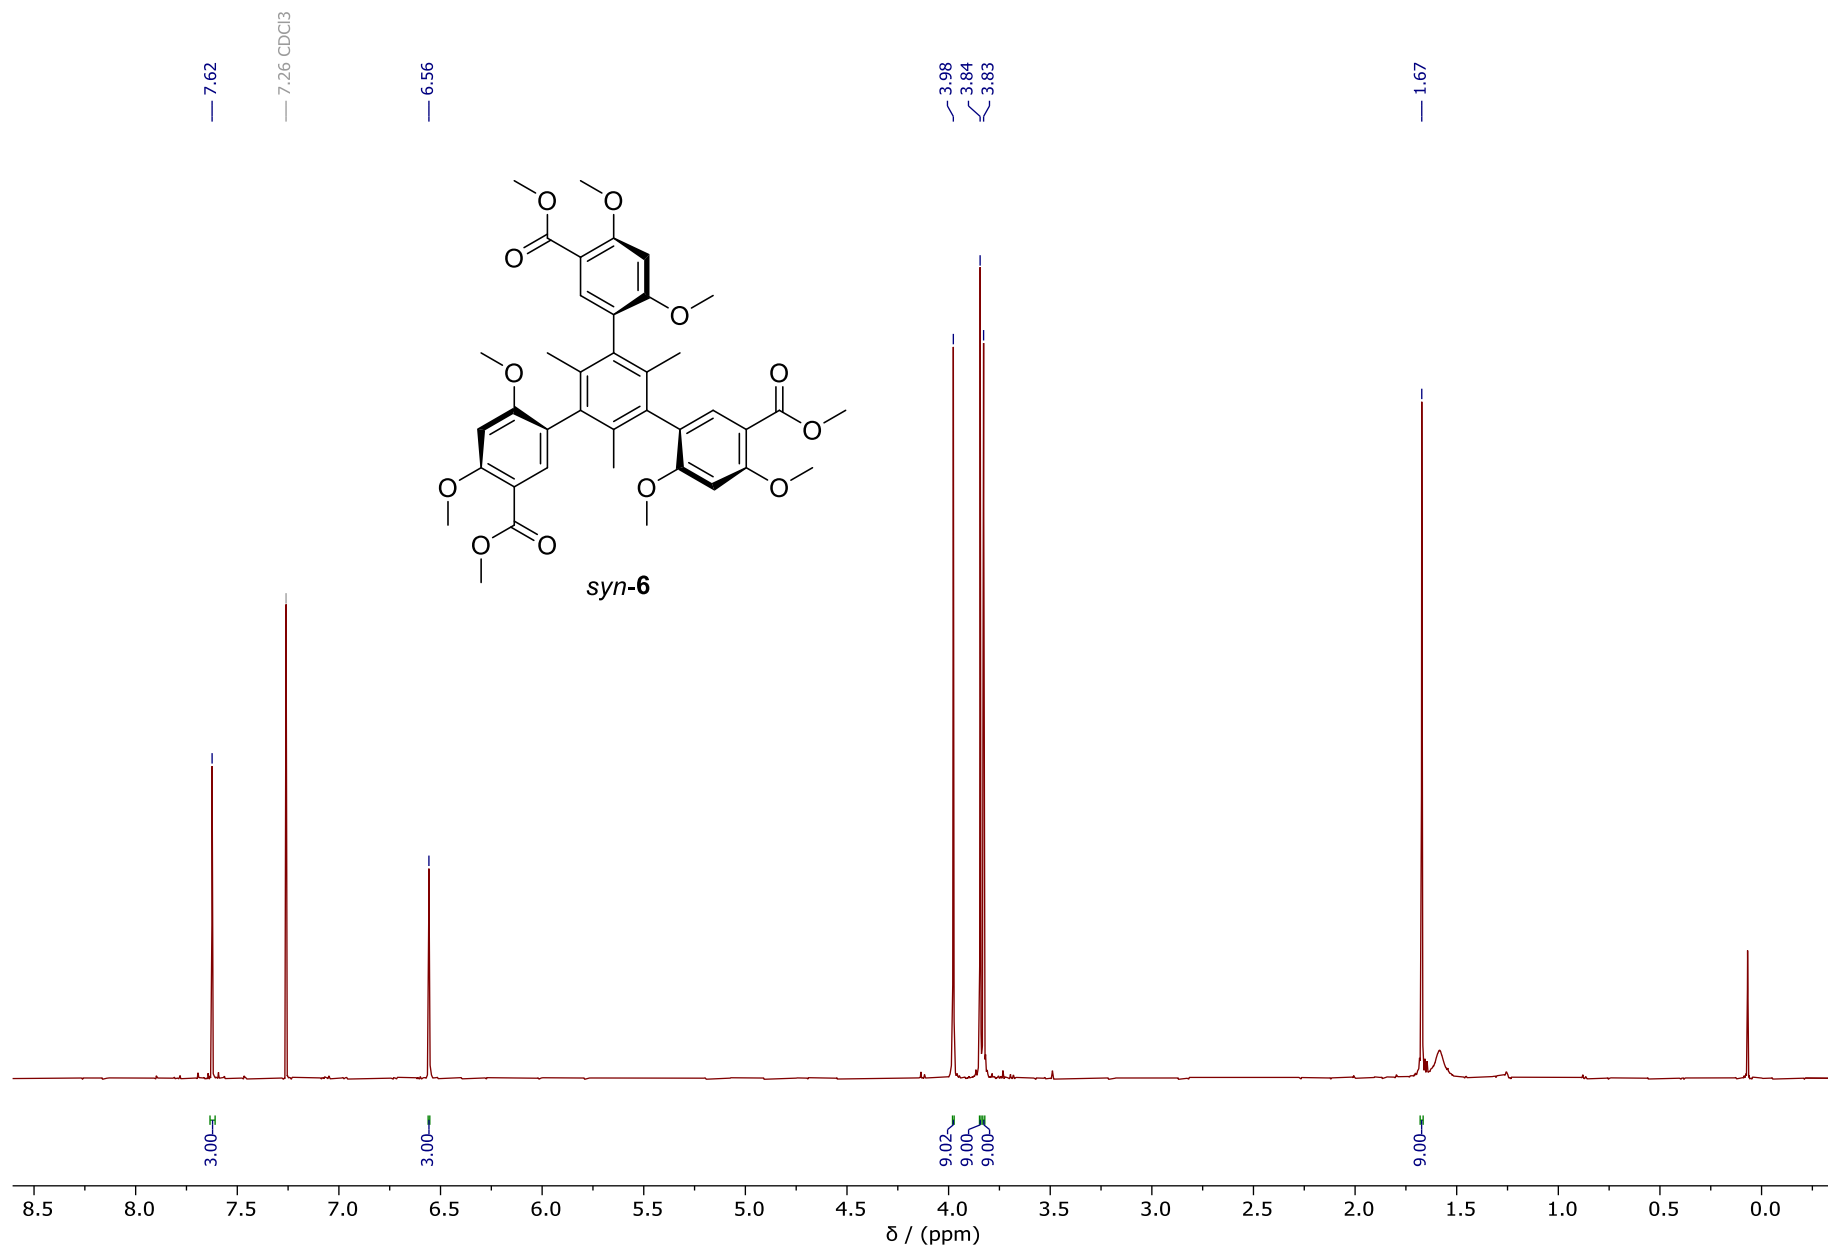

Figure S7.  $^1\text{H}$  NMR spectrum (500 MHz,  $\text{CDCl}_3$ , 298 K) of *syn-6*.

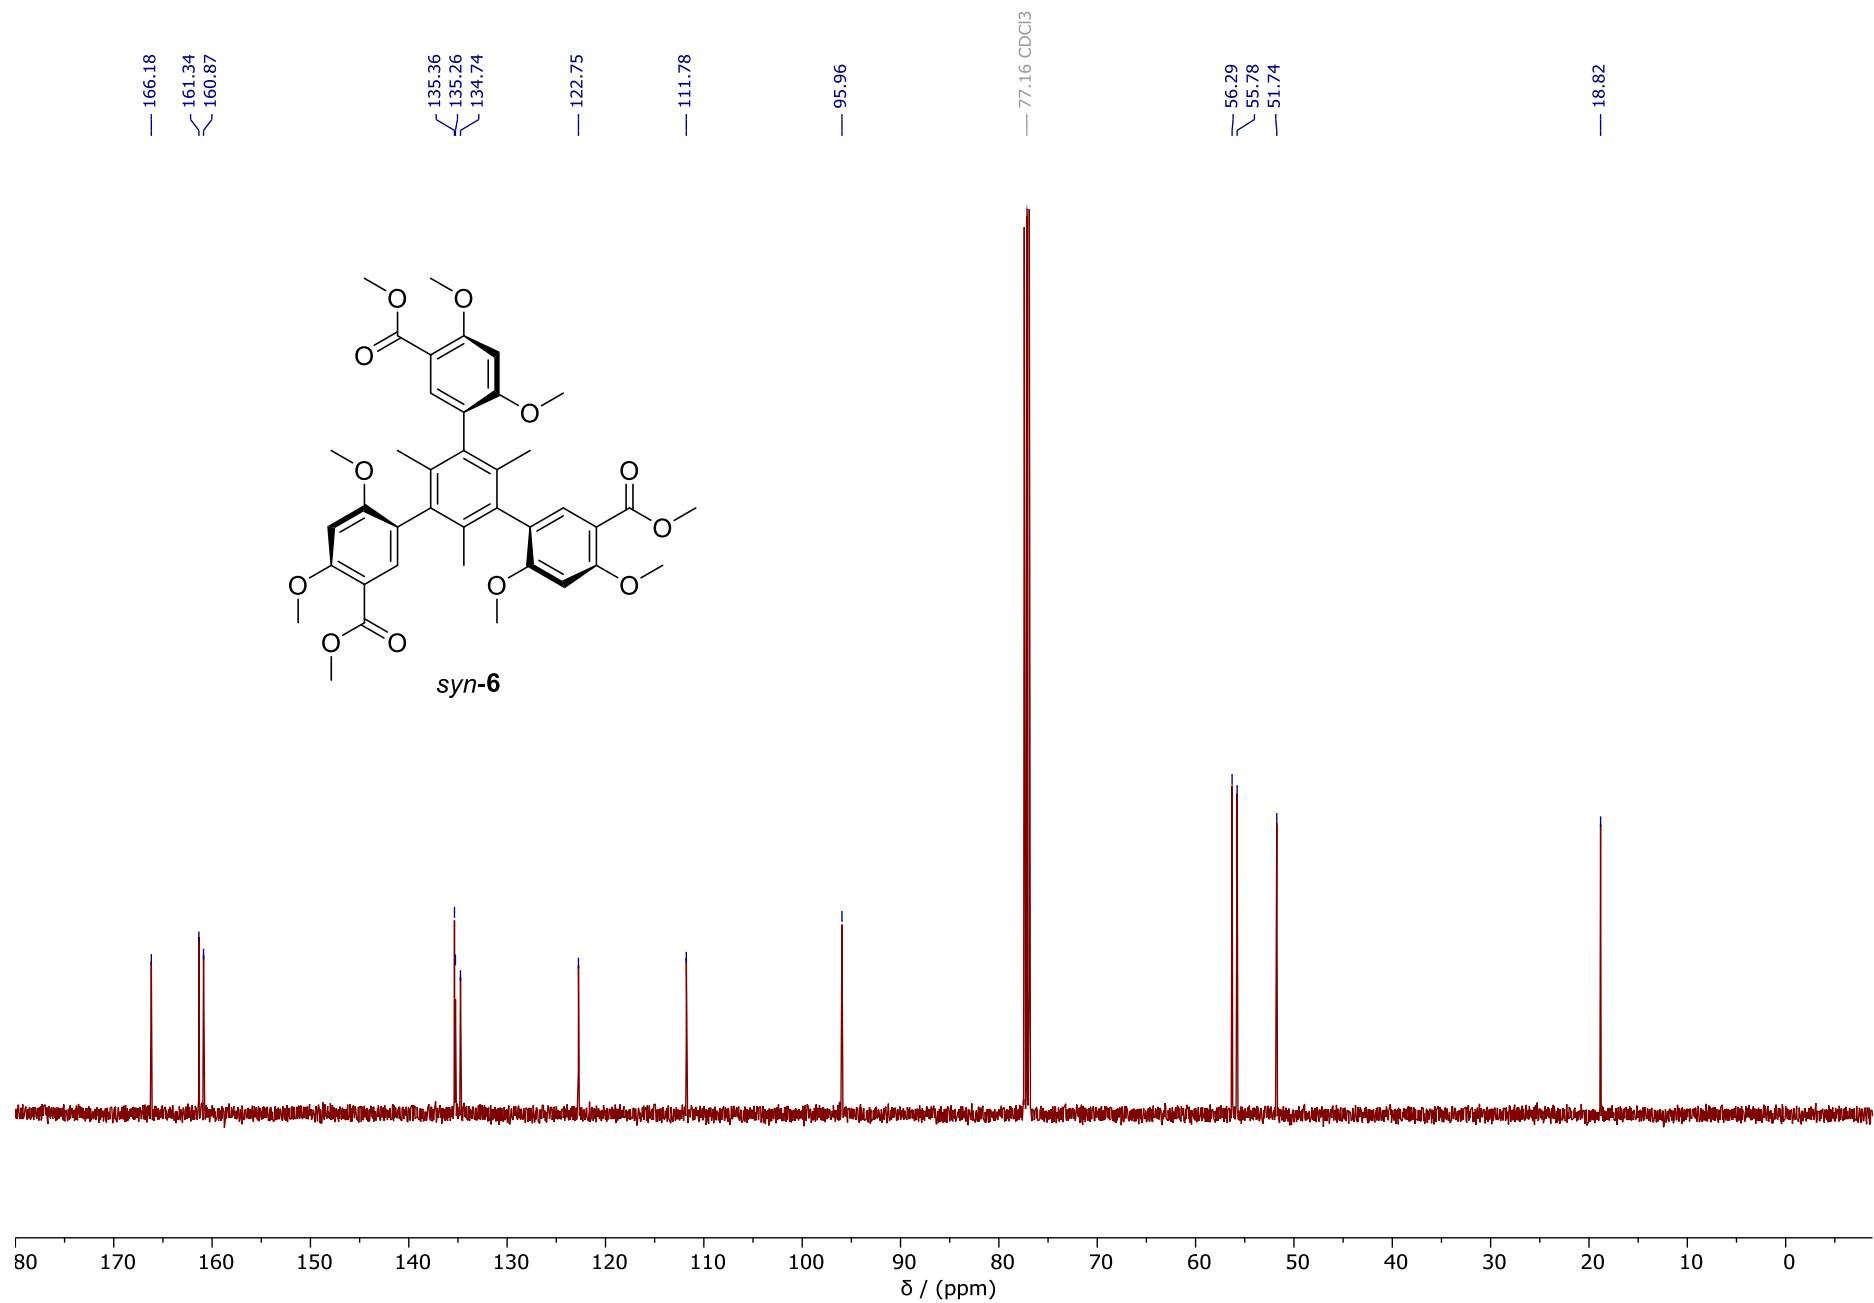

Figure S8.  $^{13}\text{C}$  ( $^1\text{H}$ ) NMR spectrum (125 MHz,  $\text{CDCl}_3$ , 298 K) of *syn-6*.



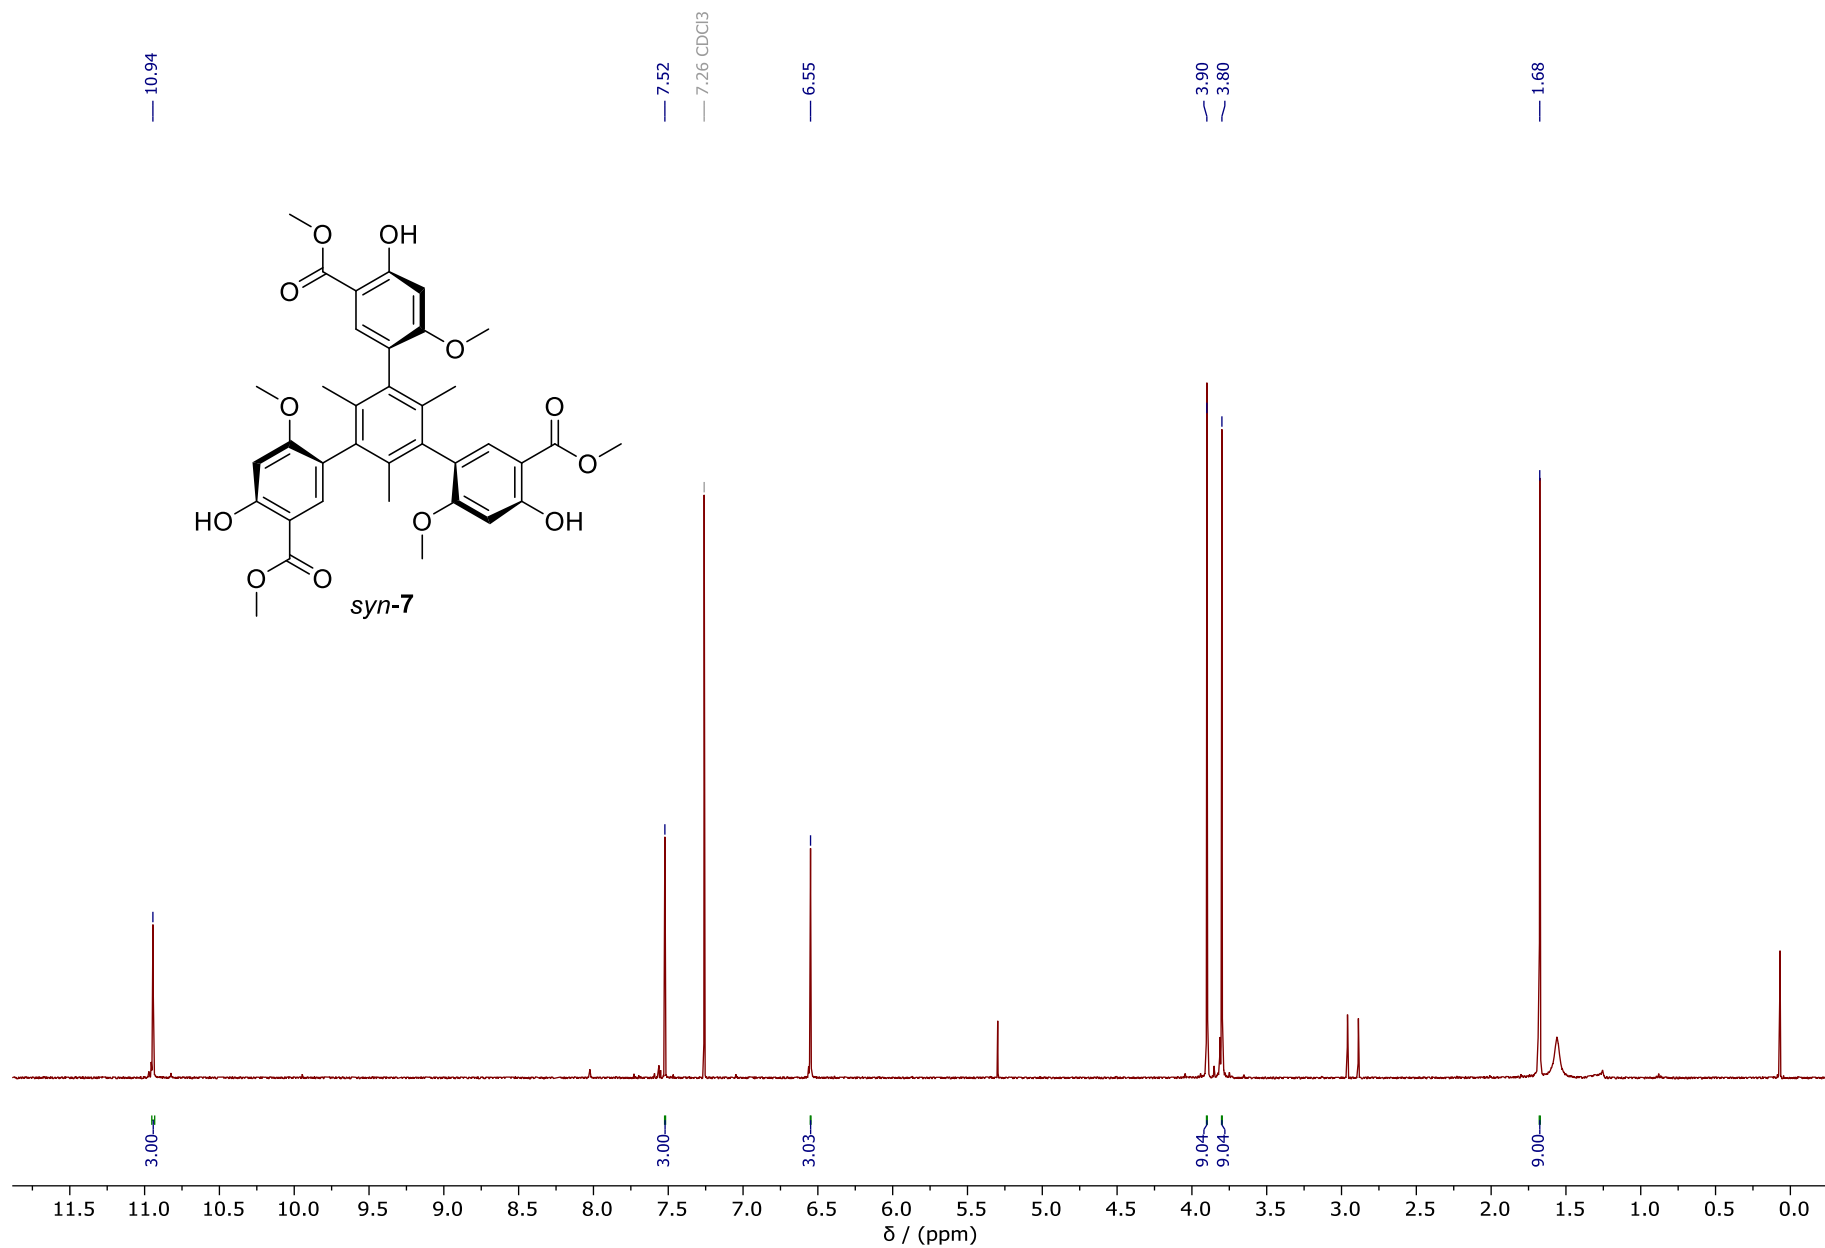

**Figure S9.** <sup>1</sup>H NMR spectrum (500 MHz, CDCl<sub>3</sub>, 298 K) of *syn-7*.

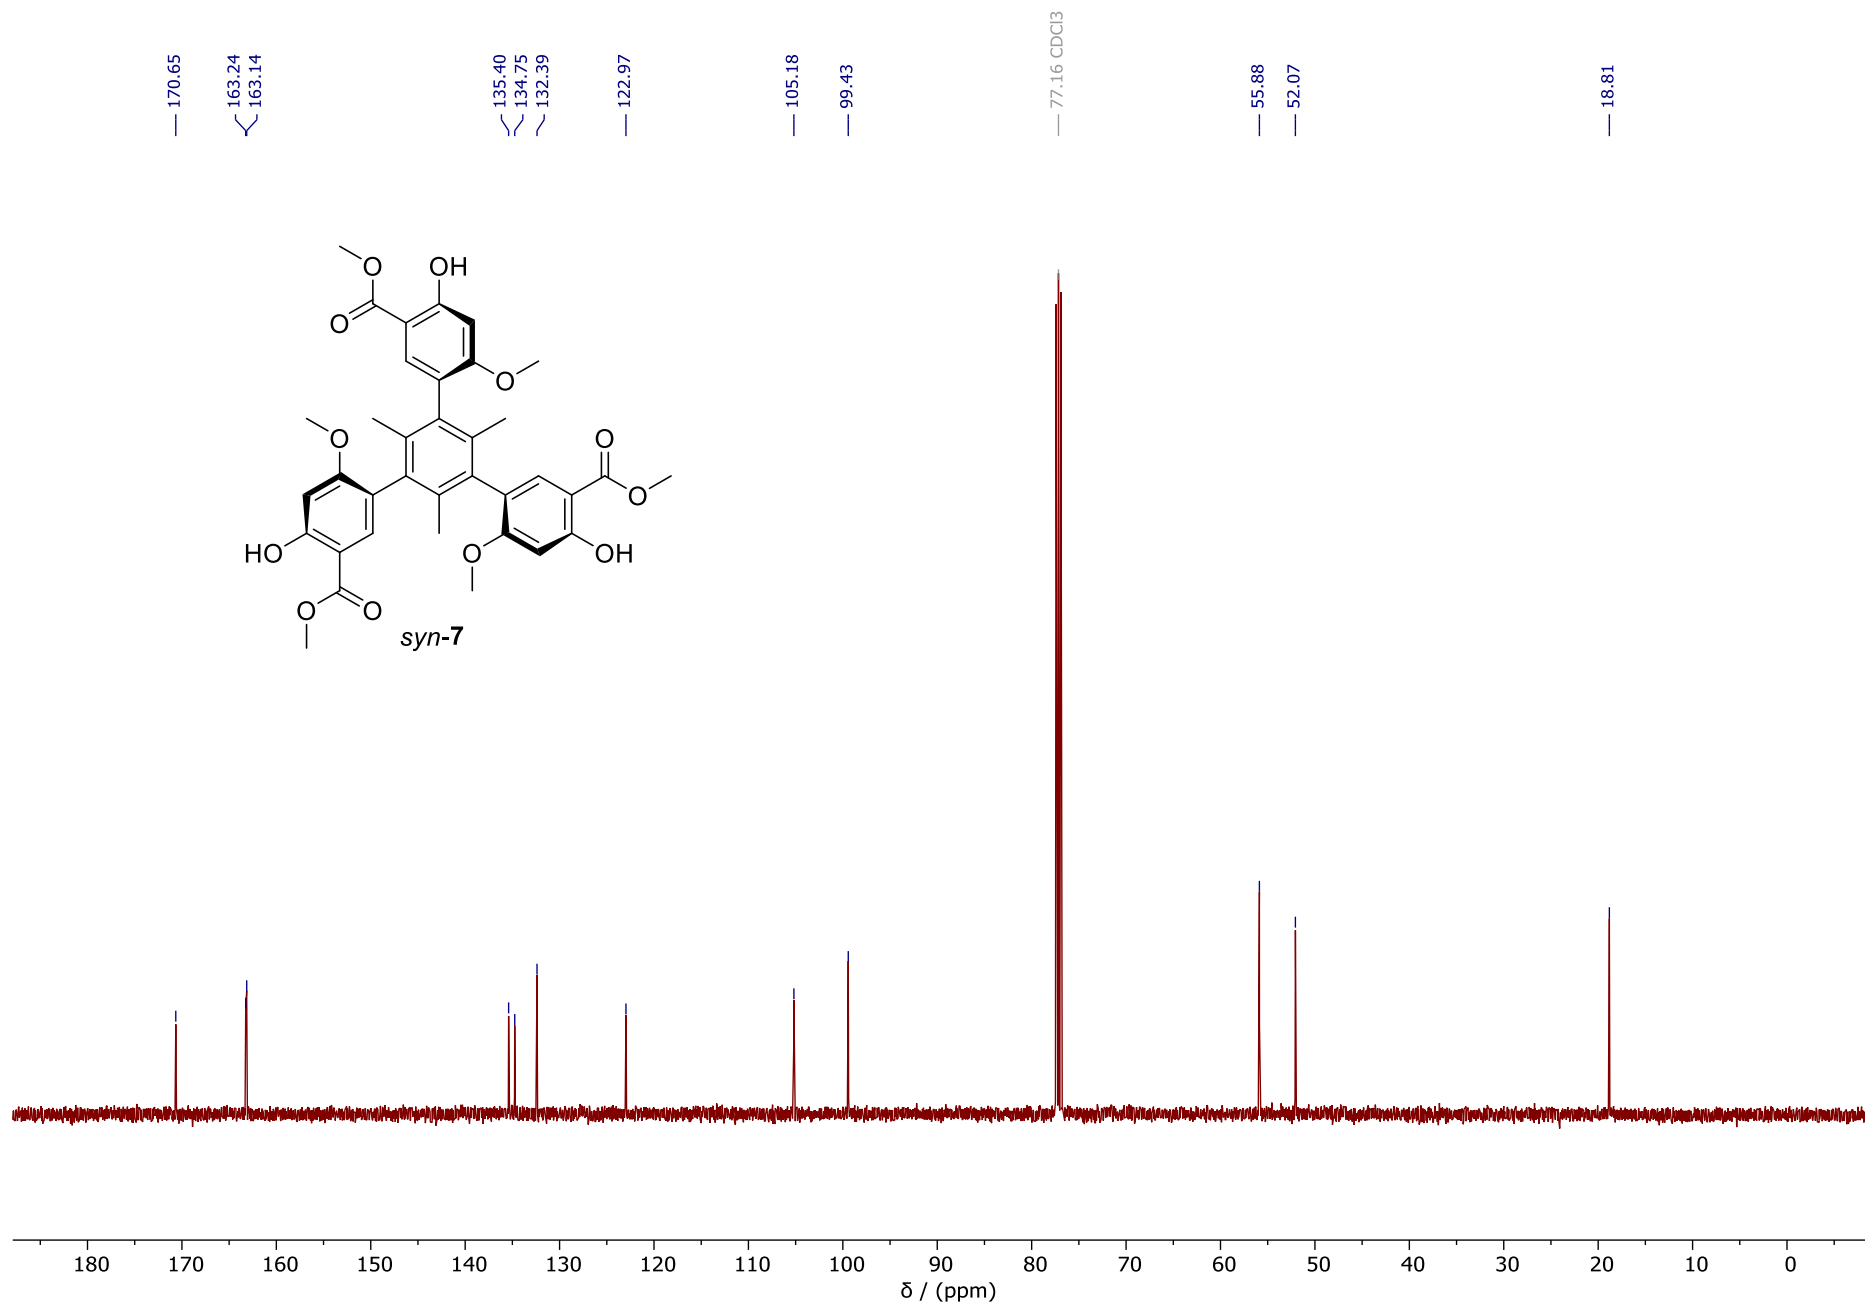

**Figure S10.**  $^{13}\text{C}$  ( $^1\text{H}$ ) NMR spectrum (125 MHz,  $\text{CDCl}_3$ , 298 K) of *syn-7*.

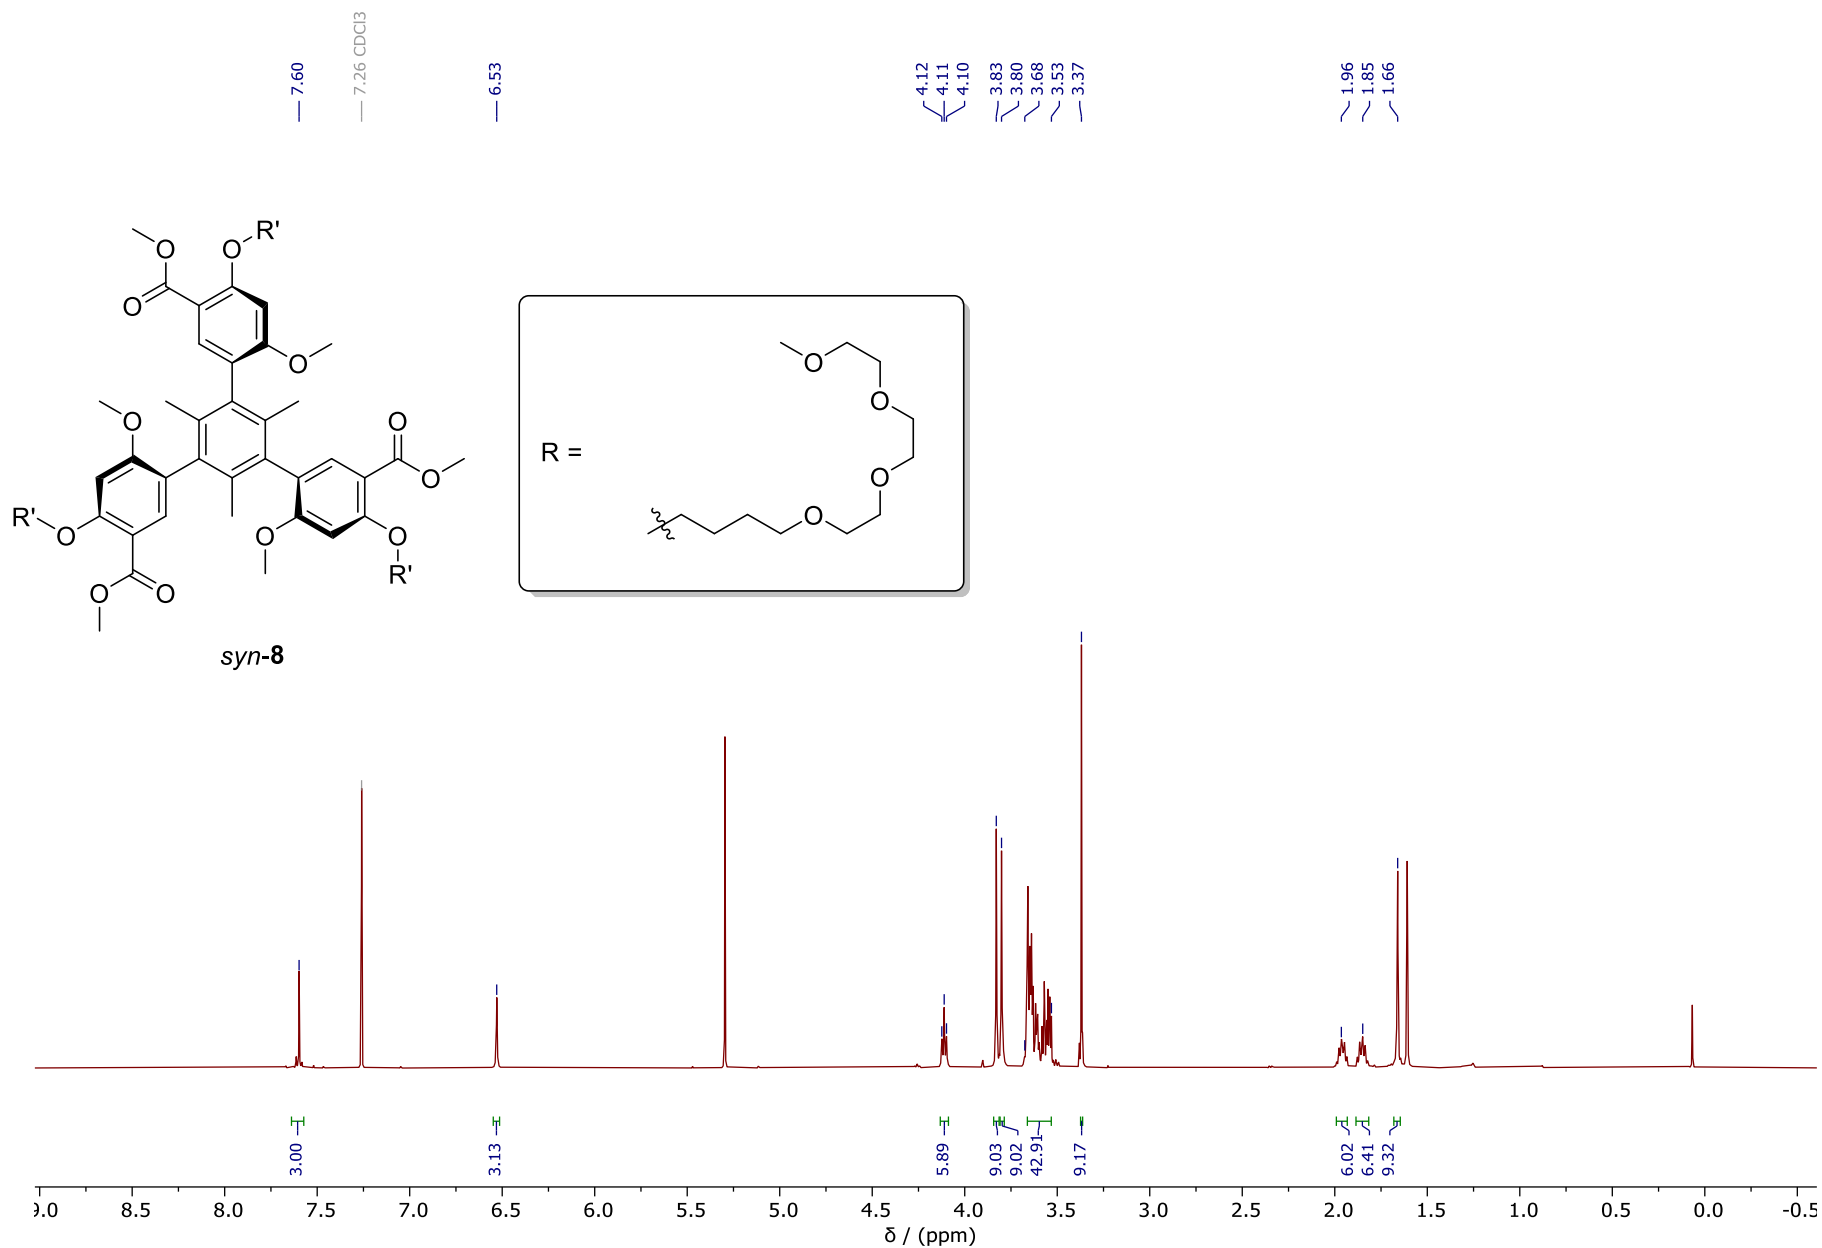

**Figure S11.**  $^1\text{H}$  NMR spectrum (500 MHz,  $\text{CDCl}_3$ , 298 K) of **yn-8**.

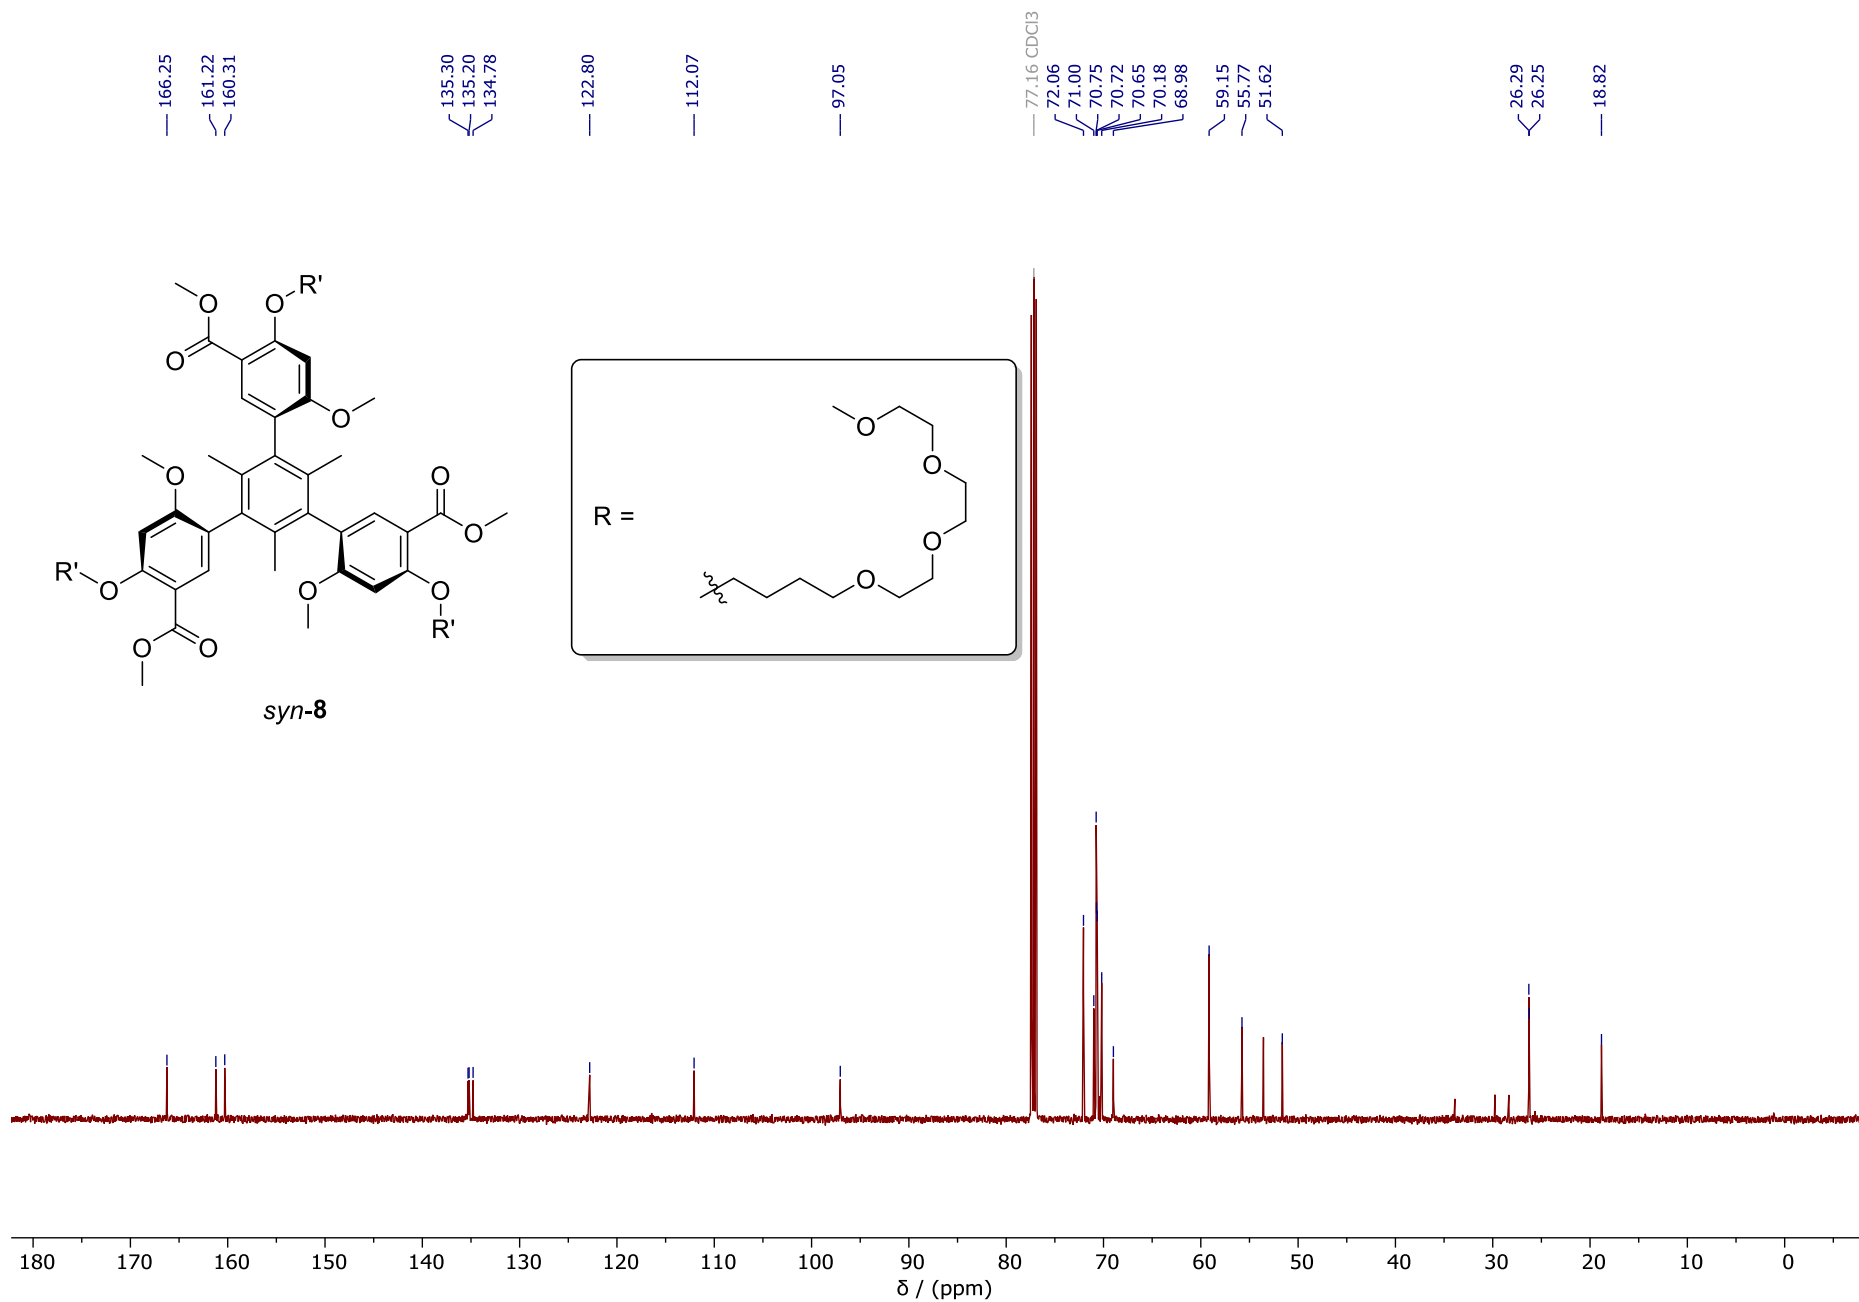

Figure S12.  $^{13}\text{C}$  ( $^1\text{H}$ ) NMR spectrum (125 MHz,  $\text{CDCl}_3$ , 298 K) of *syn-8*.

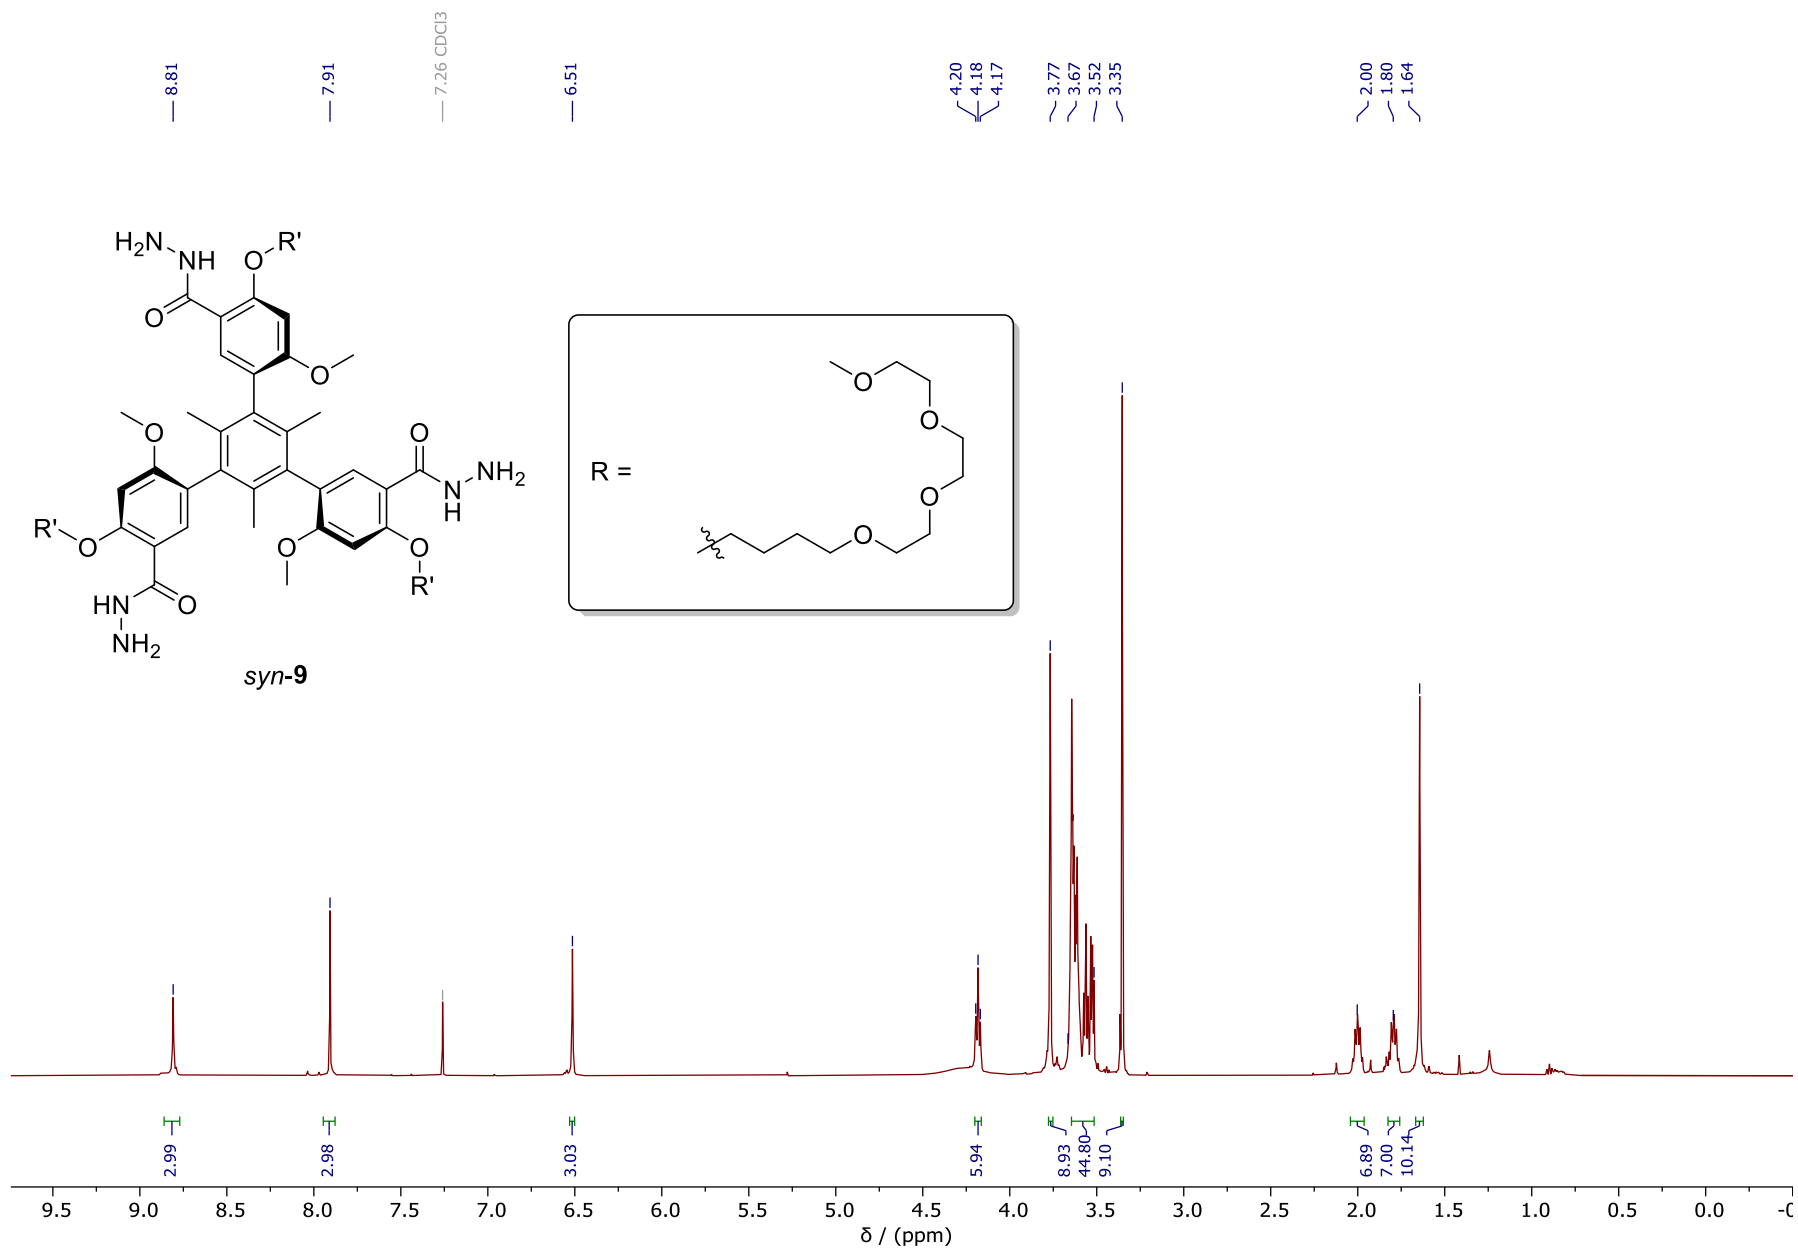

Figure S13.  $^1\text{H}$  NMR spectrum (500 MHz,  $\text{CDCl}_3$ , 298 K) of *syn-9*.

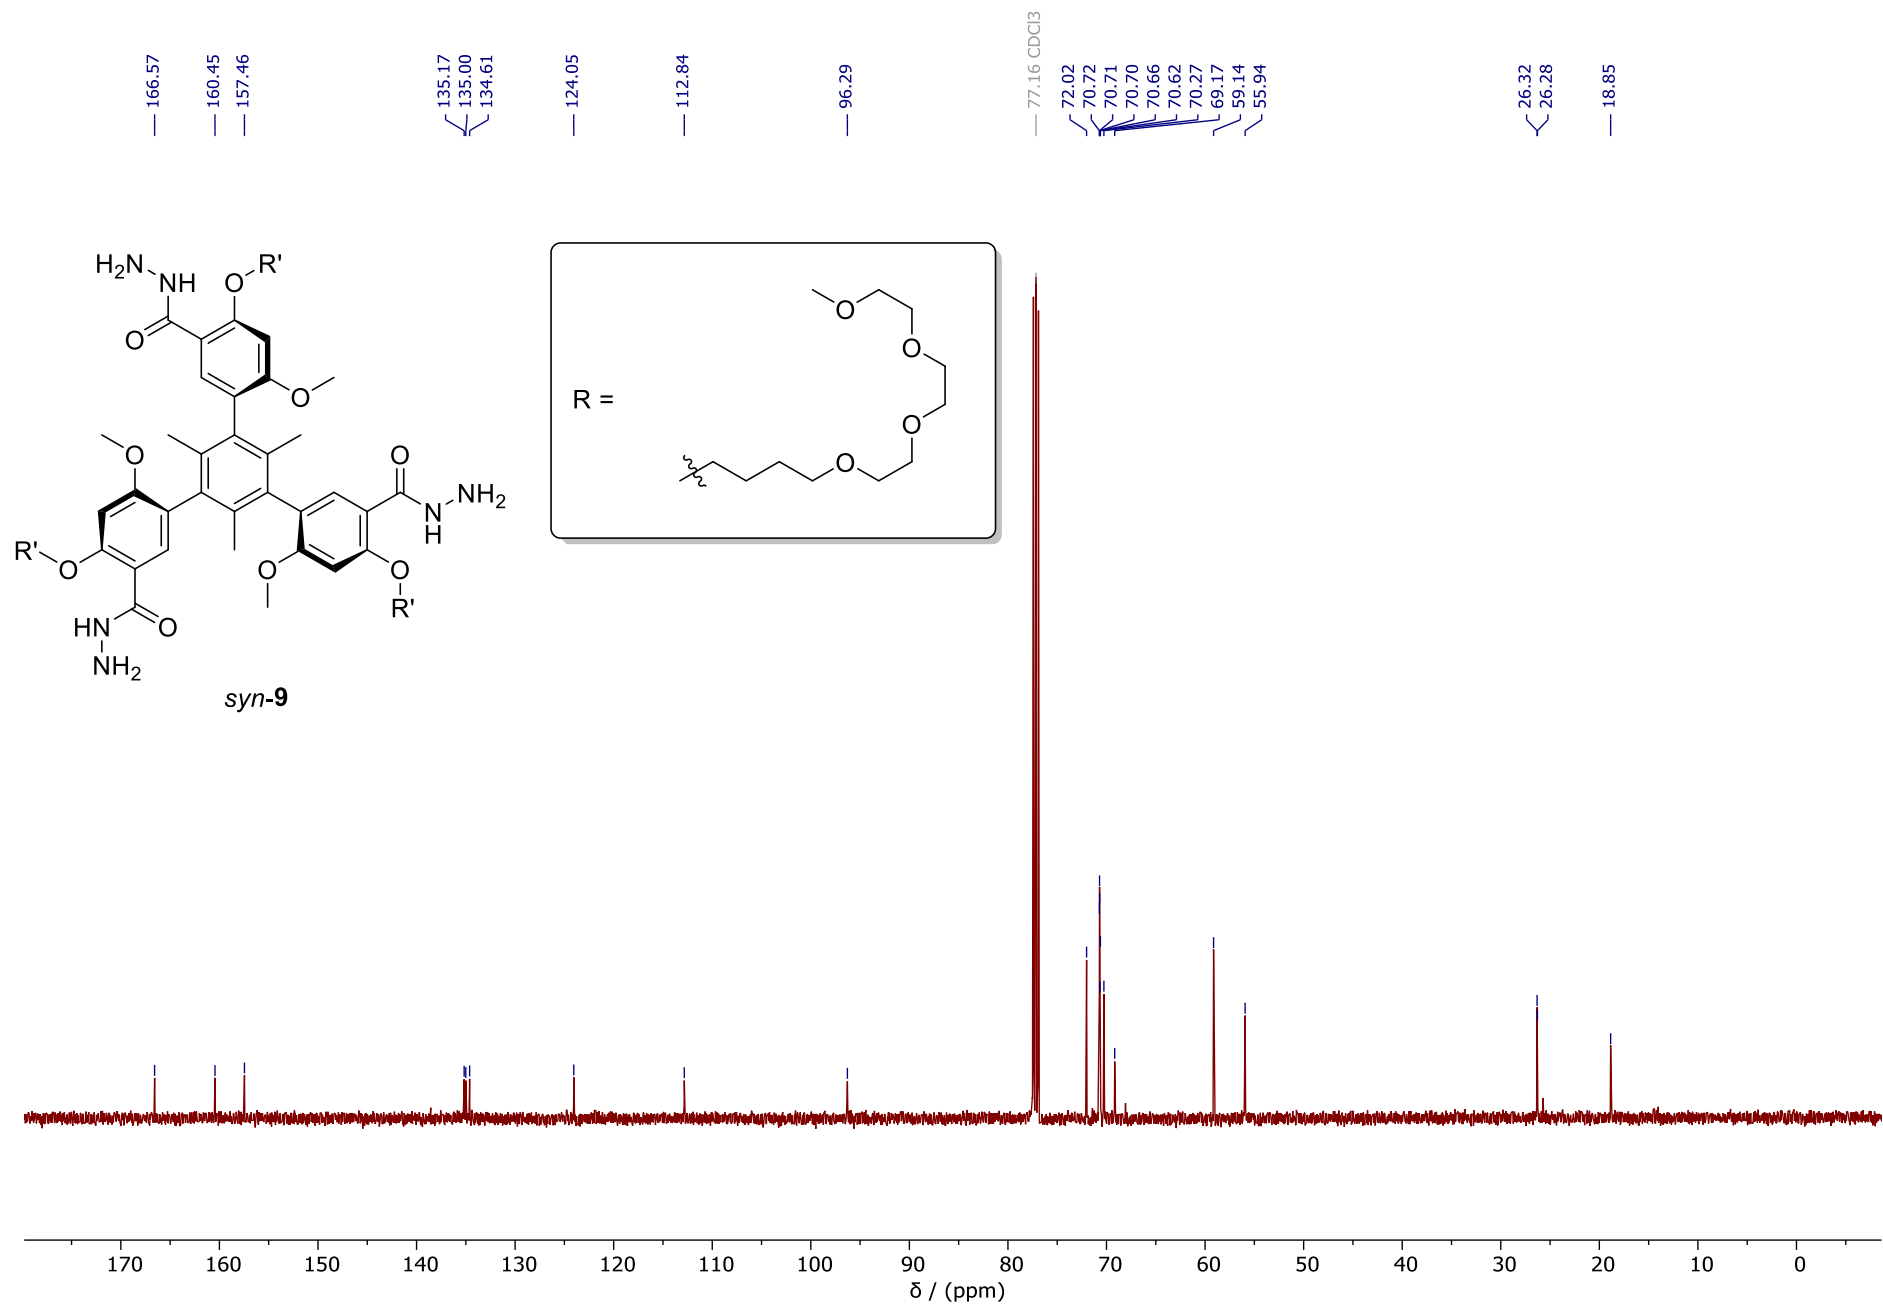

Figure S14.  $^{13}\text{C}$  ( $^1\text{H}$ ) NMR spectrum (125 MHz,  $\text{CDCl}_3$ , 298 K) of *syn-9*.



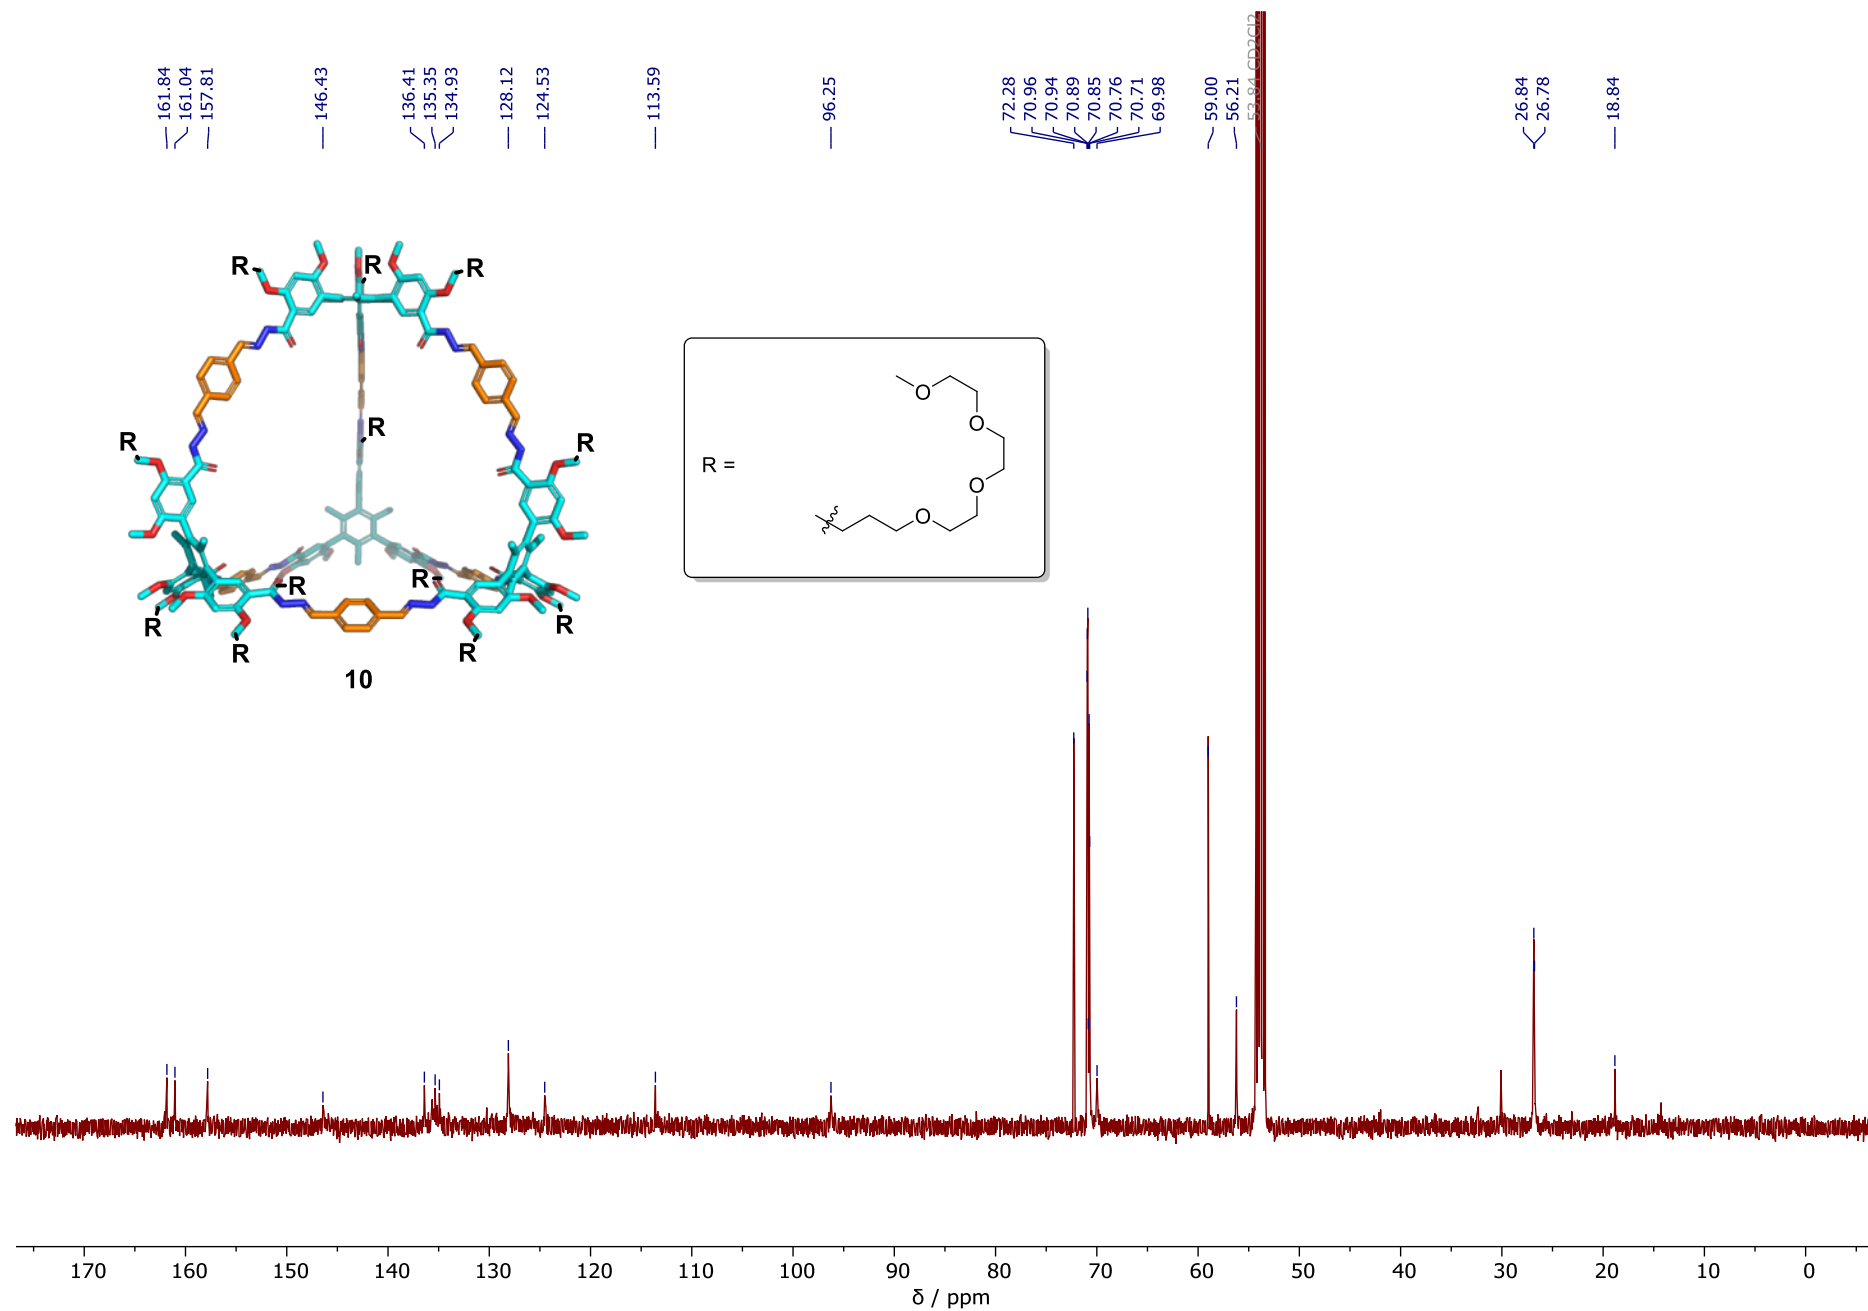

**Figure S16.**  $^{13}\text{C}$  ( $^1\text{H}$ ) NMR spectrum (125 MHz,  $\text{CDCl}_3$ , 298 K) of **10**.



DOSY 74 1 C:\Bruker\TopSpin4.1.1\data

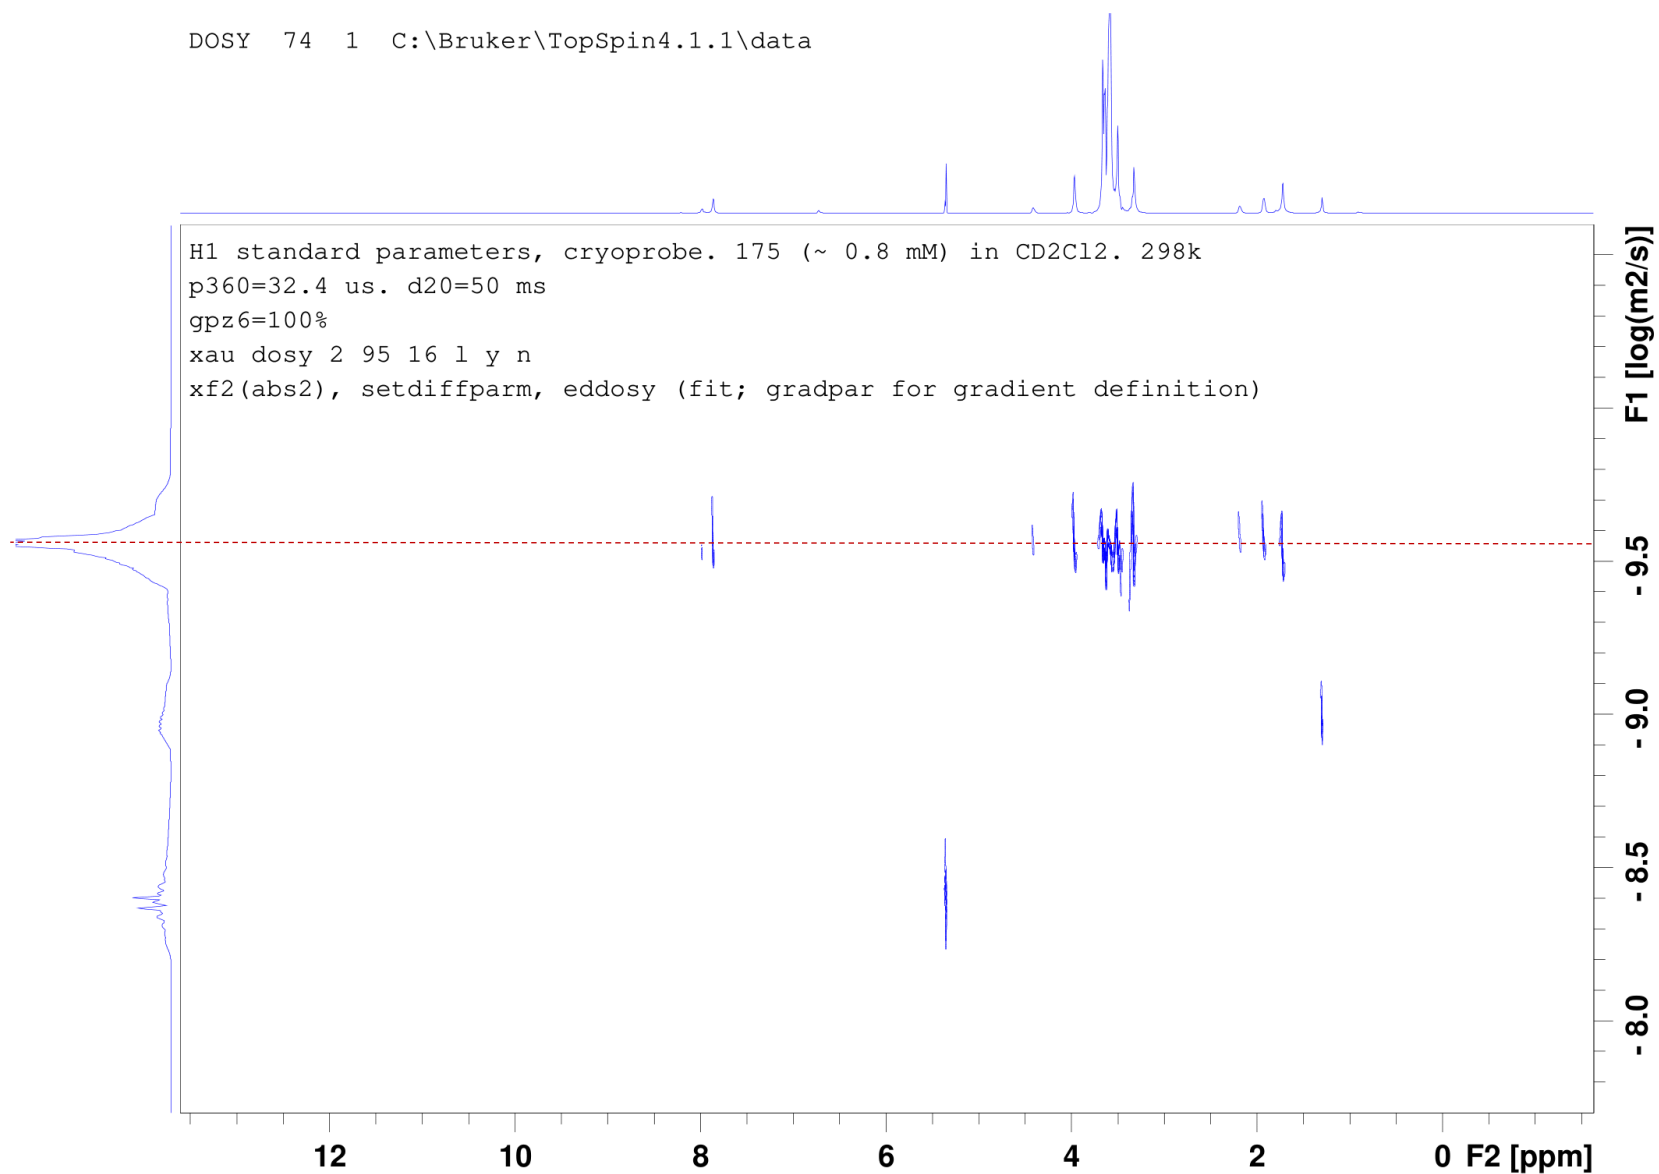

Figure S17. <sup>1</sup>H DOSY NMR spectrum (800 MHz, CD<sub>2</sub>Cl<sub>2</sub>) of **10**.



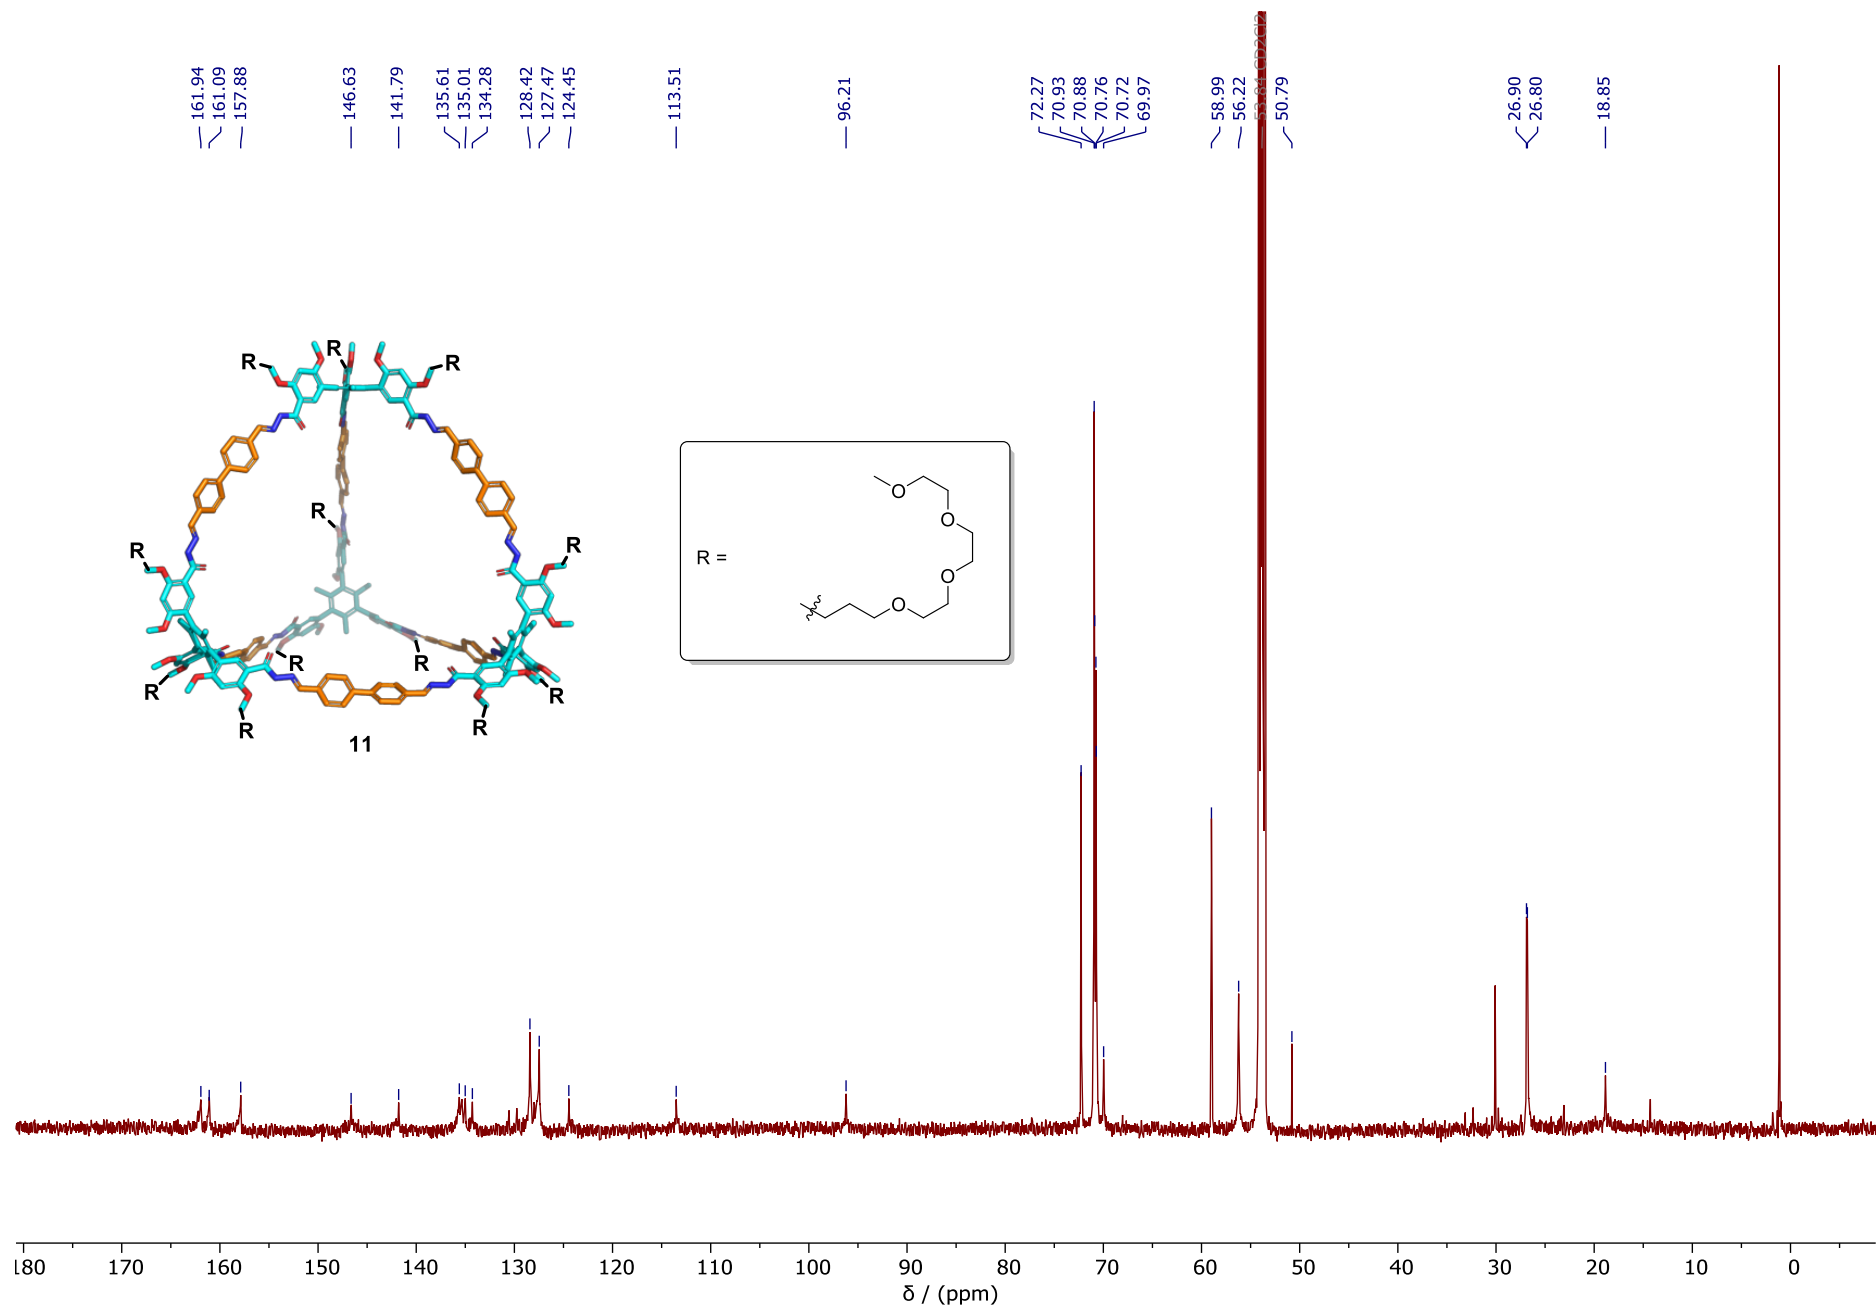

**Figure S19.**  $^{13}\text{C}$  ( $^1\text{H}$ ) NMR spectrum (200 MHz,  $\text{CDCl}_3$ , 298 K) of **11**.

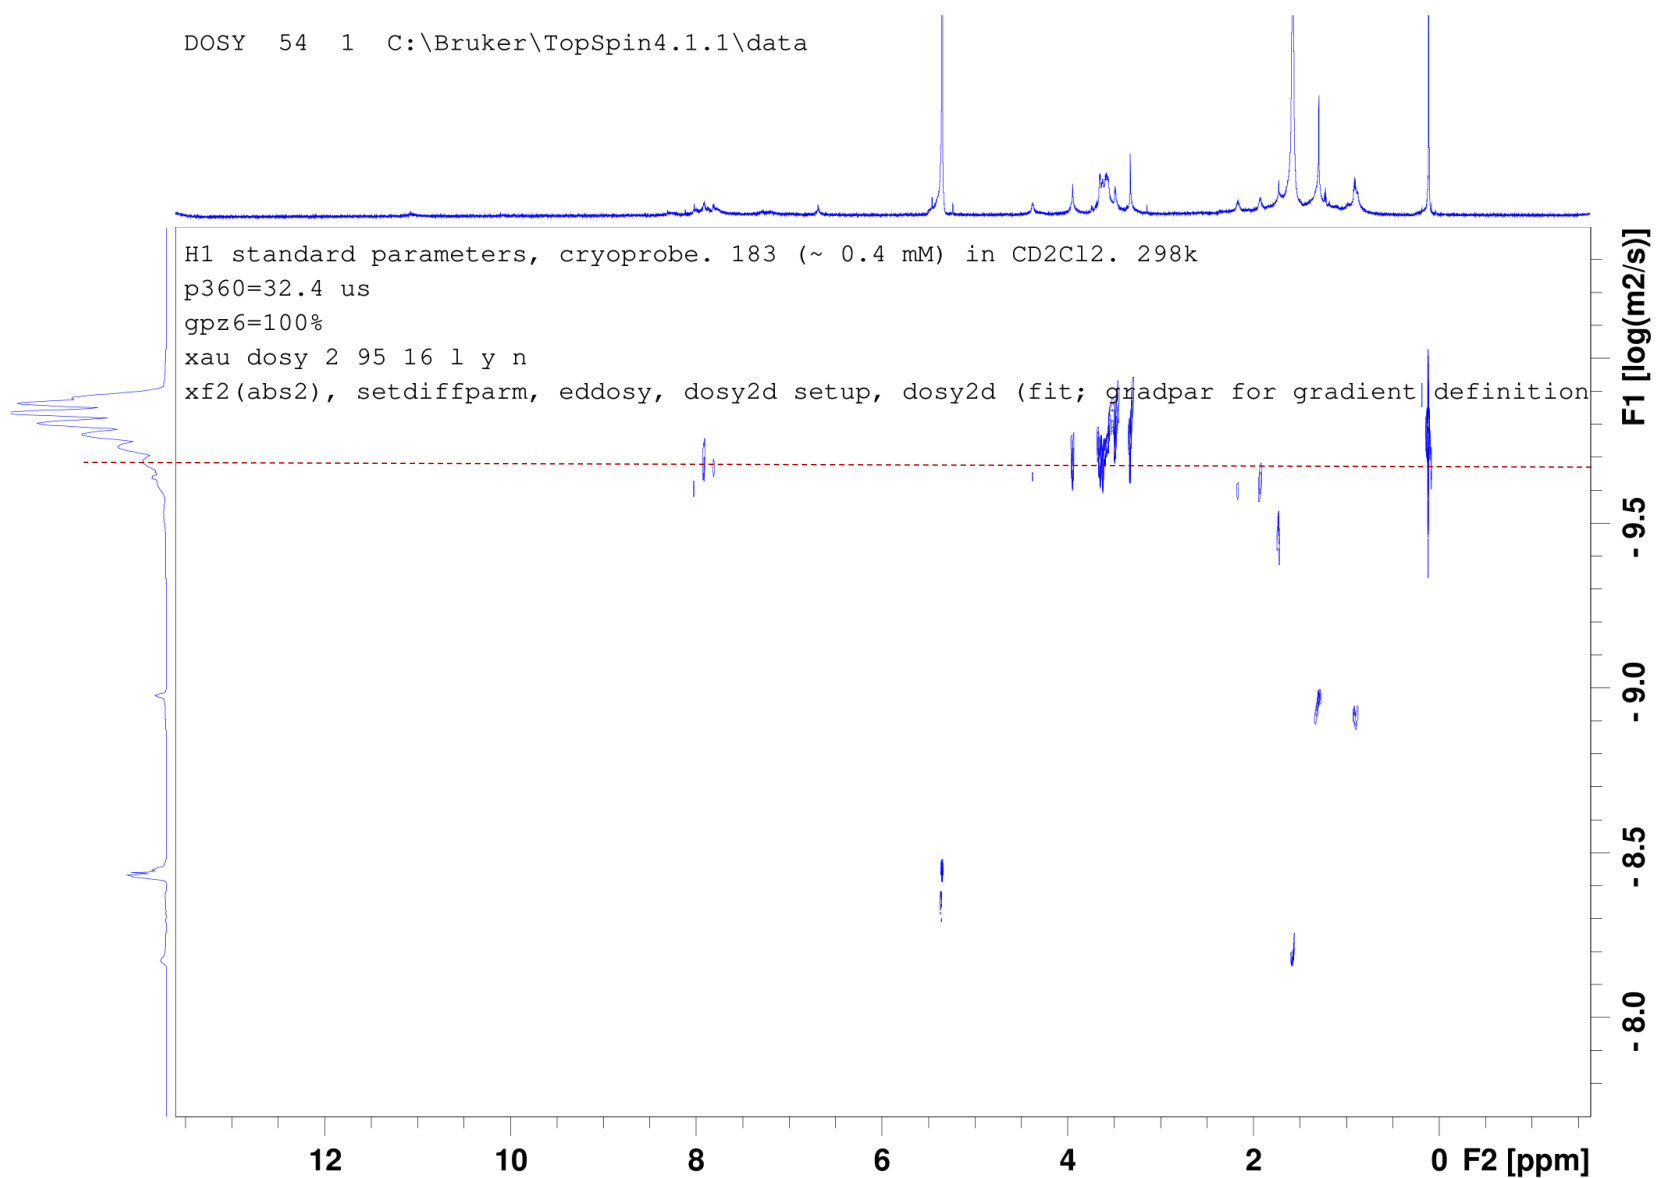

**Figure S20.** <sup>1</sup>H DOSY NMR spectrum (800 MHz, CD<sub>2</sub>Cl<sub>2</sub>) of **11**.

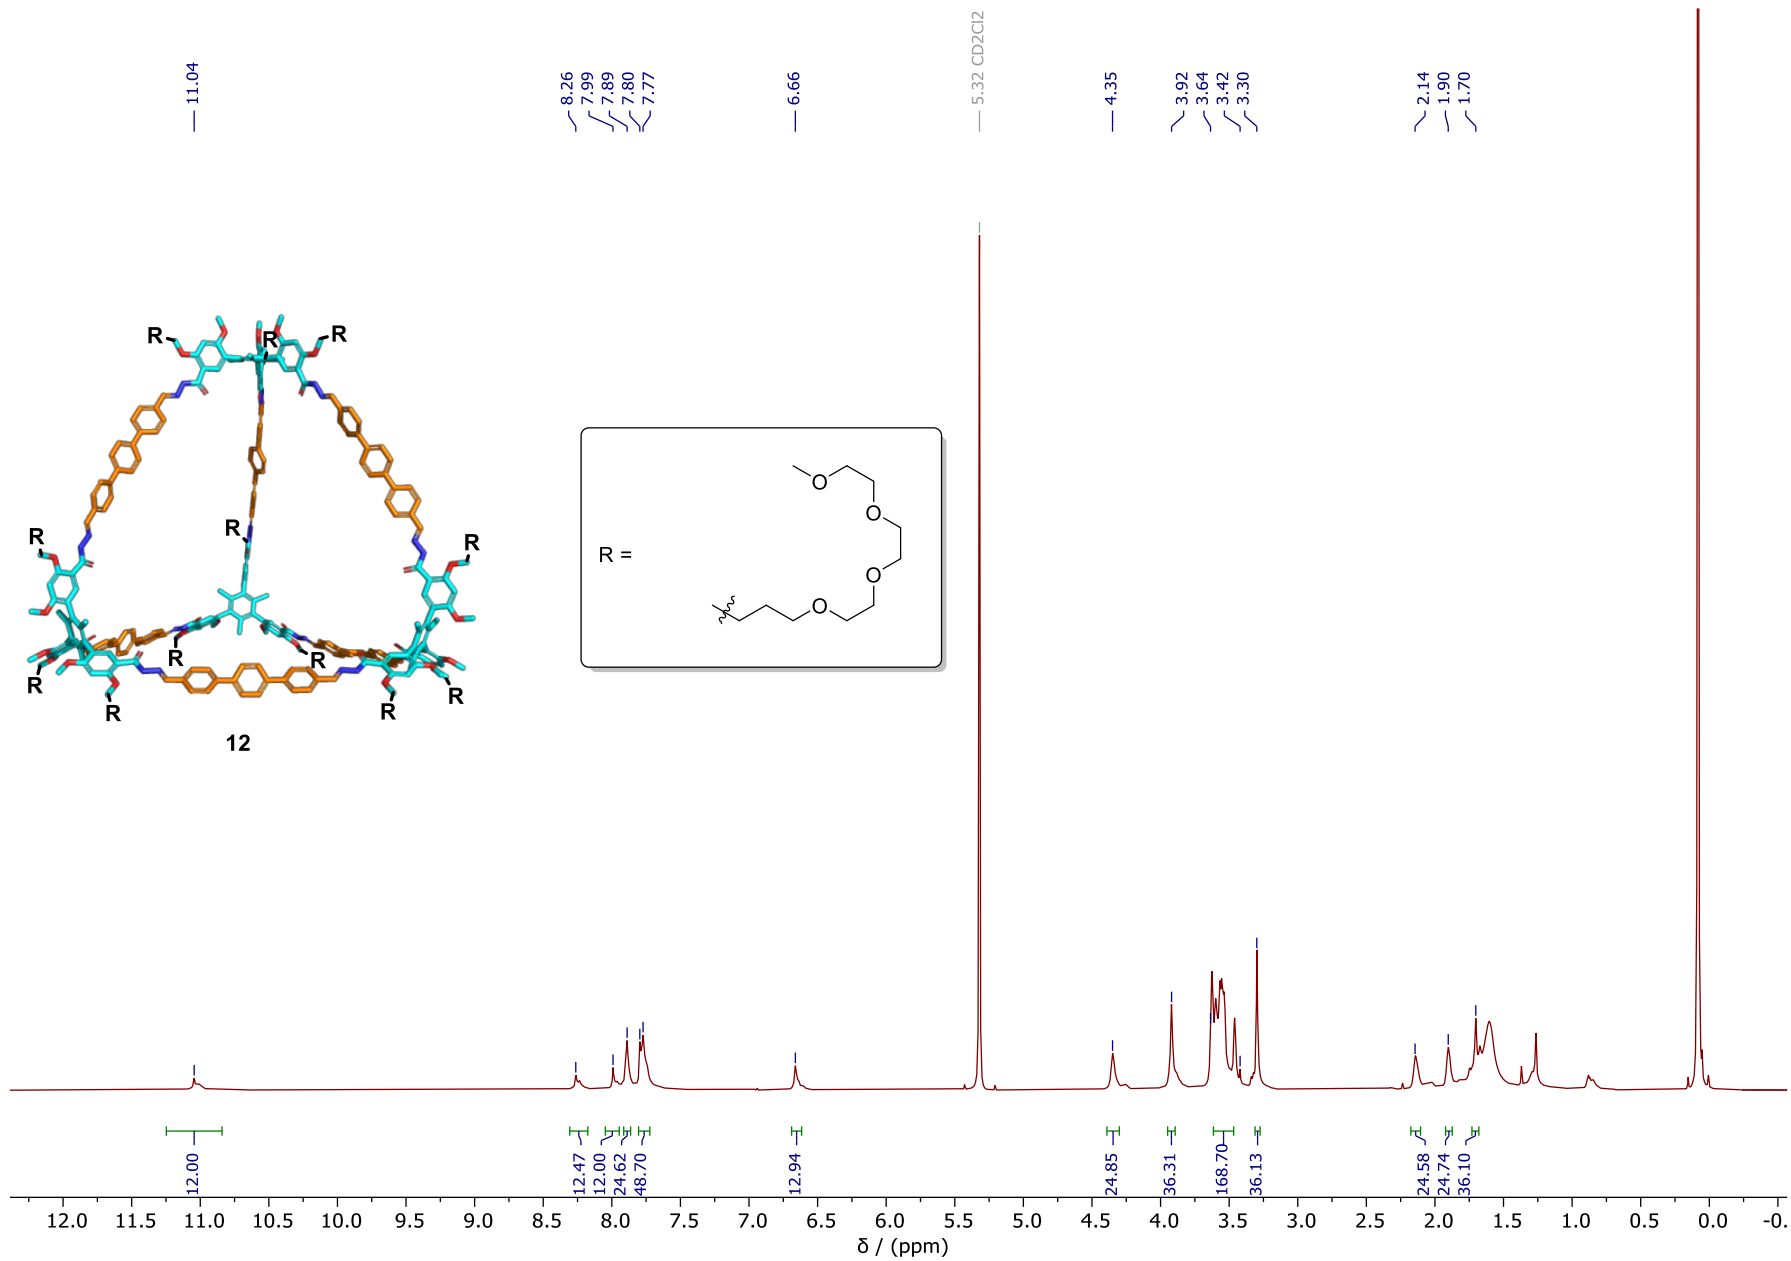

Figure S21.  $^1\text{H}$  NMR spectrum (800 MHz,  $\text{CD}_2\text{Cl}_2$ , 298 K) of **12**.

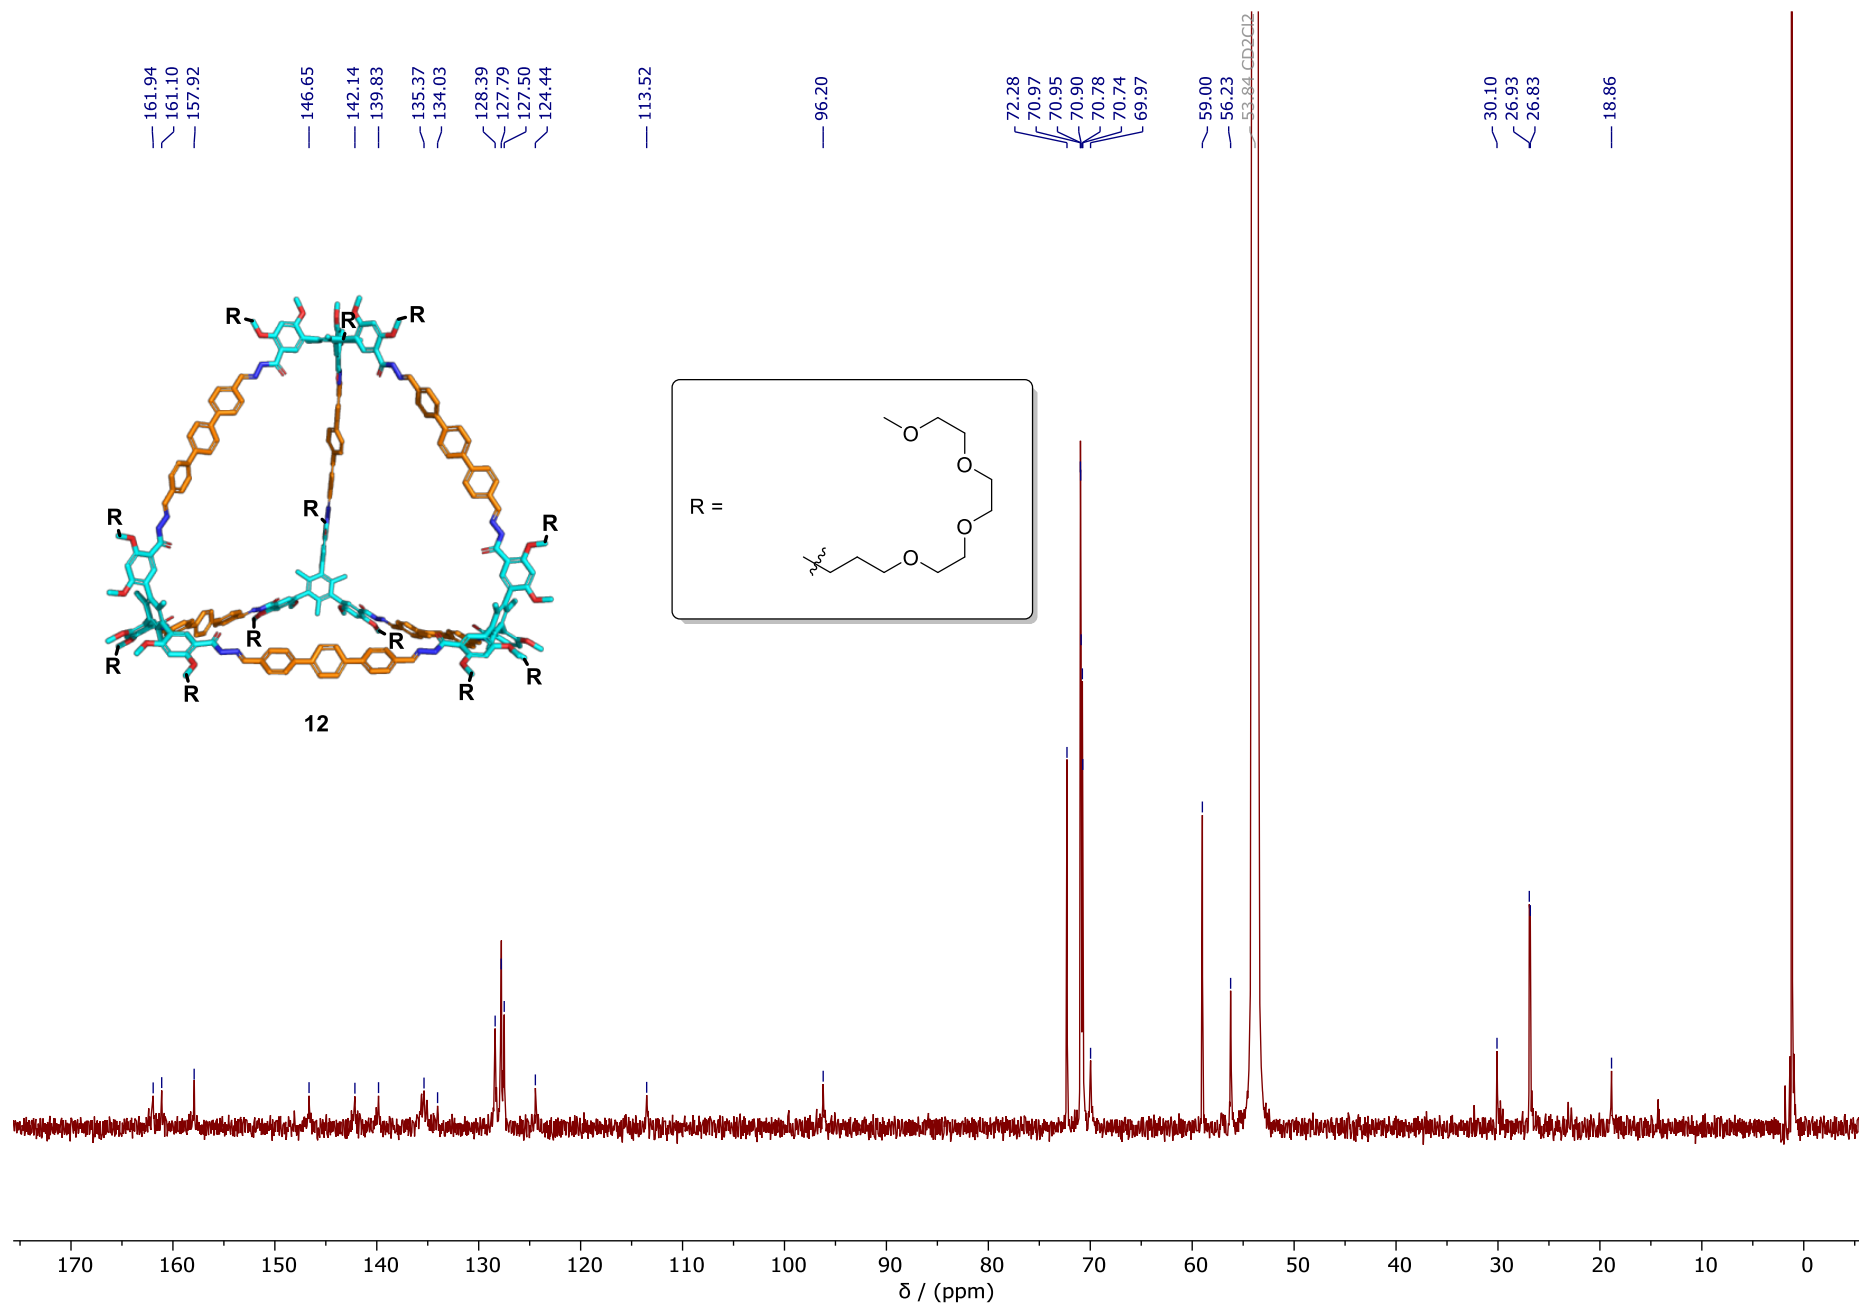

**Figure S22.**  $^{13}\text{C}$  ( $^1\text{H}$ ) NMR spectrum (200 MHz,  $\text{CDCl}_3$ , 298 K) of **12**.

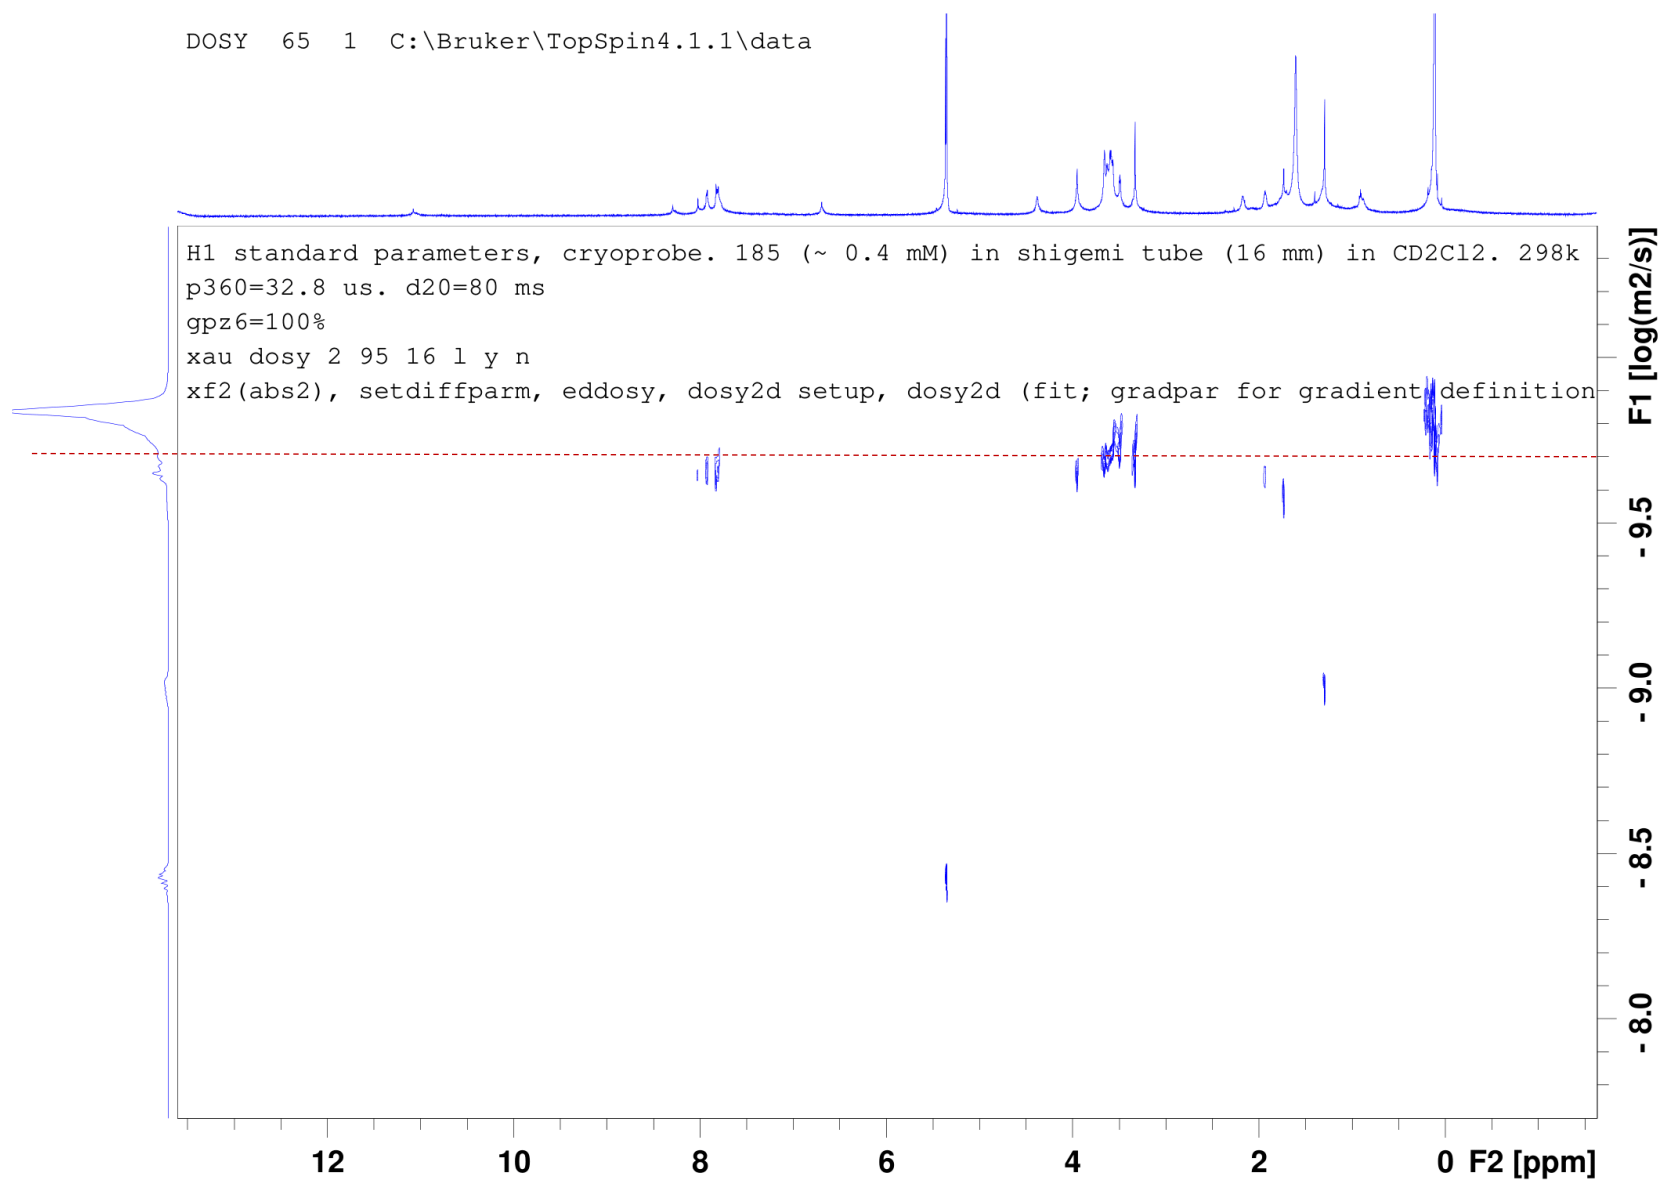

**Figure S23.**  $^1\text{H}$  DOSY NMR spectrum (800 MHz,  $\text{CD}_2\text{Cl}_2$ ) of **12**.





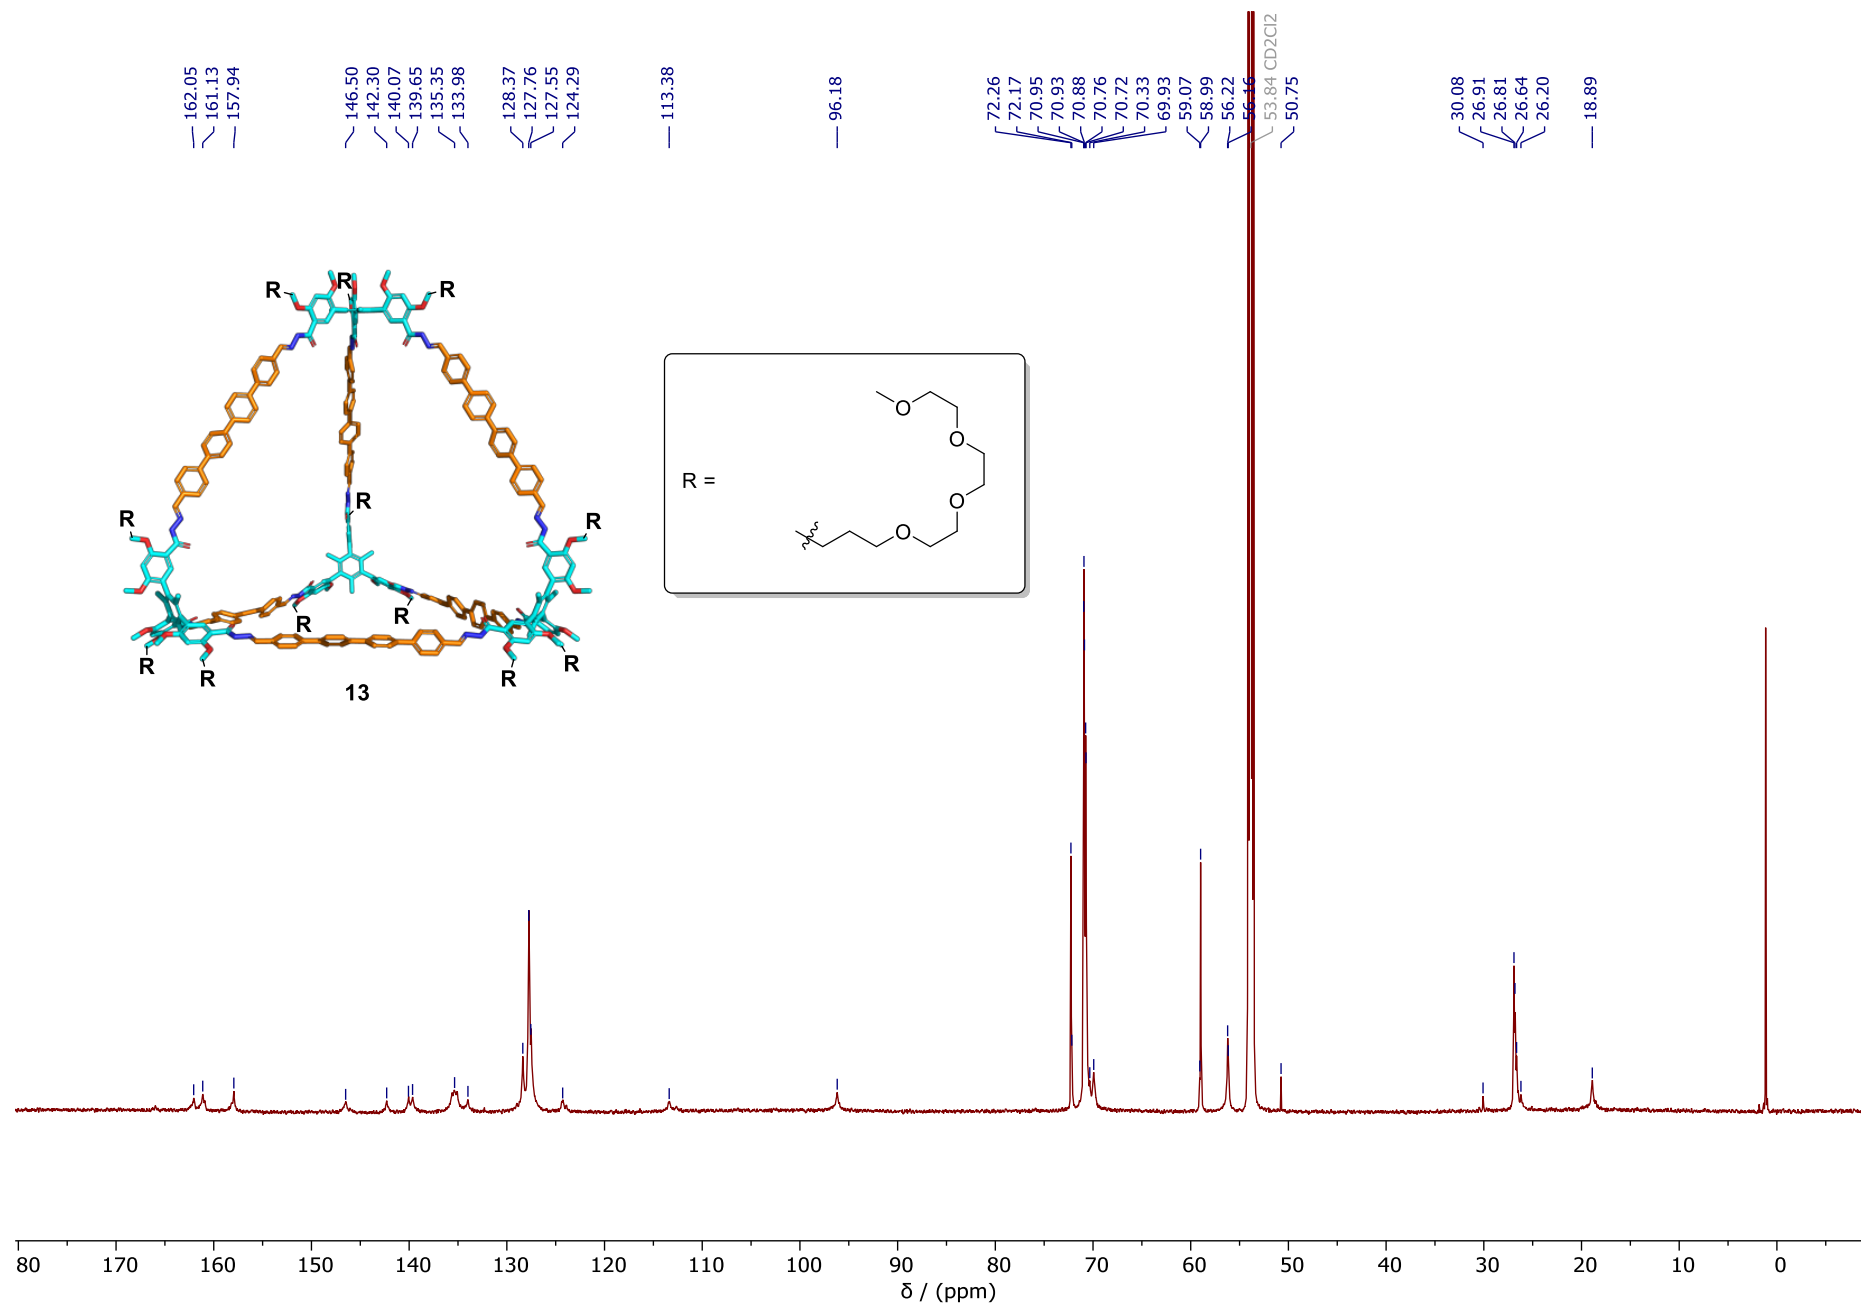

**Figure S25.**  $^{13}\text{C}$  ( $^1\text{H}$ ) NMR spectrum (200 MHz,  $\text{CDCl}_3$ , 298 K) of **13**.

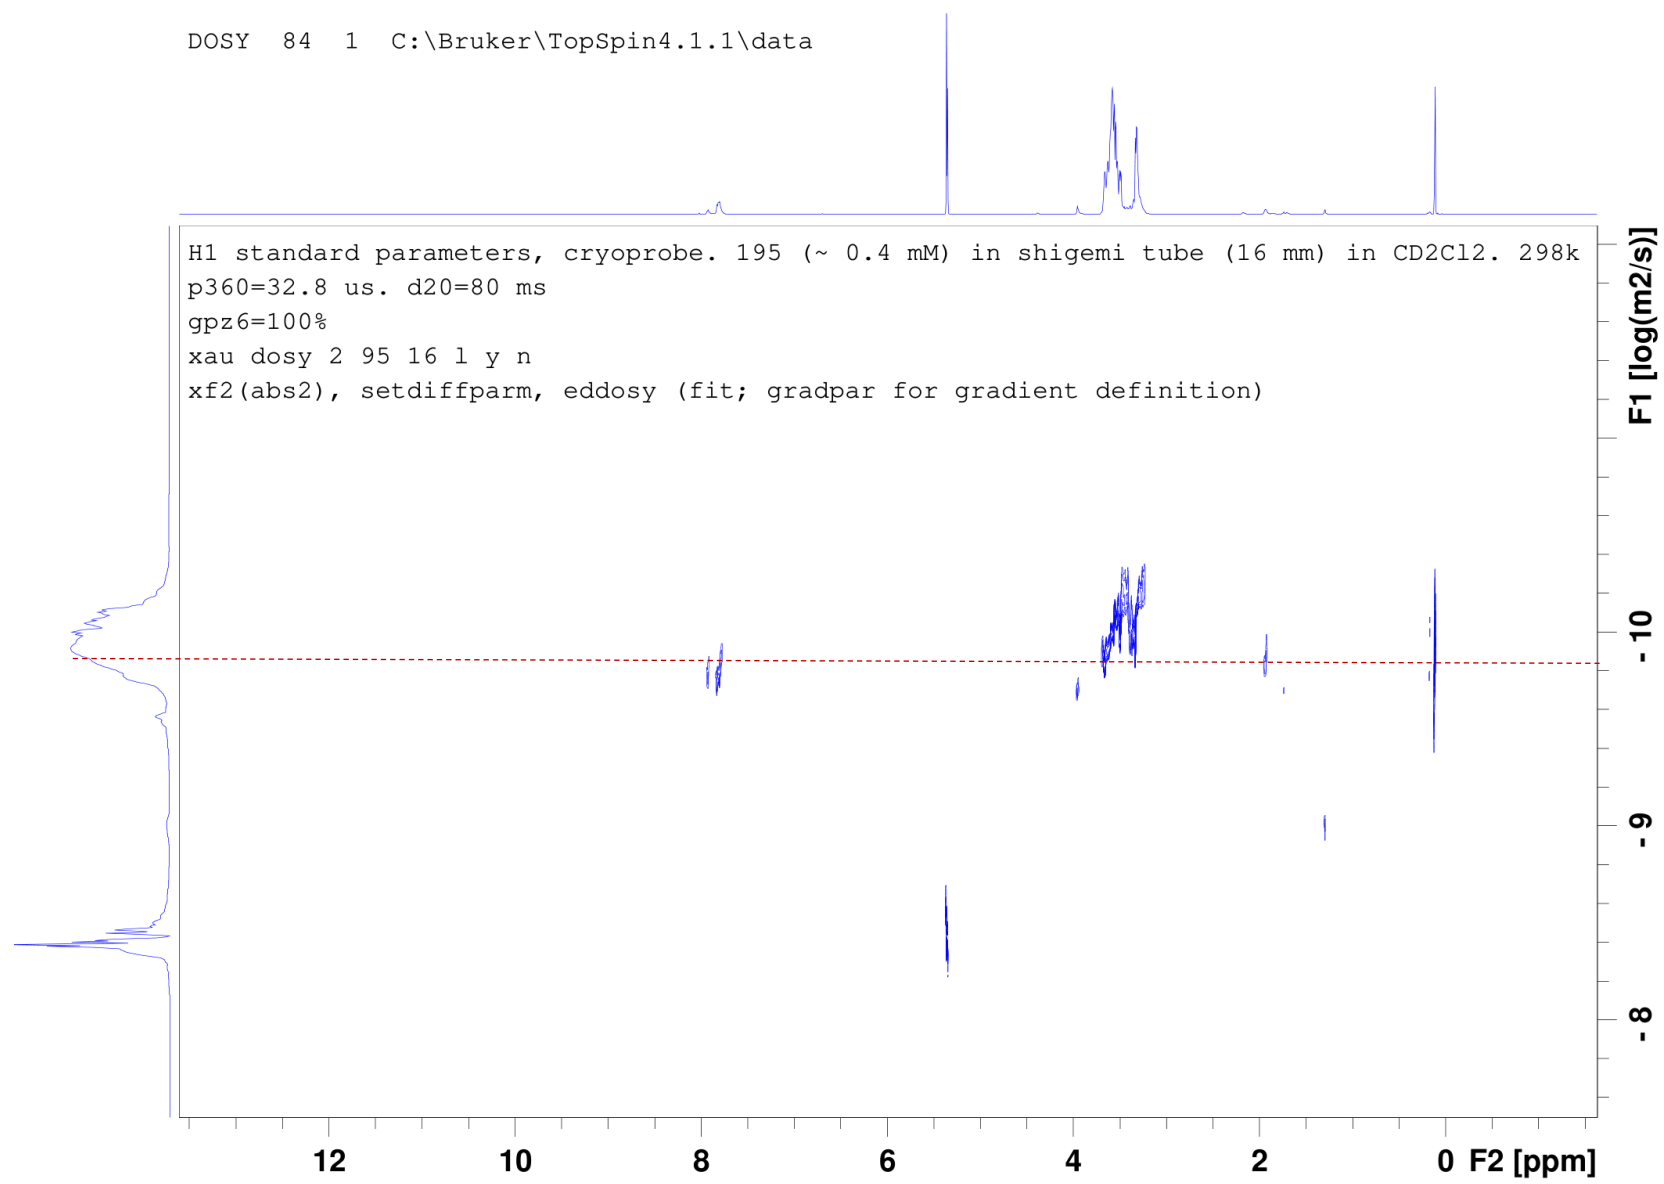

**Figure S26.** <sup>1</sup>H DOSY NMR spectrum (800 MHz, CD<sub>2</sub>Cl<sub>2</sub>) of **13**.

## VI. Mass Spectra

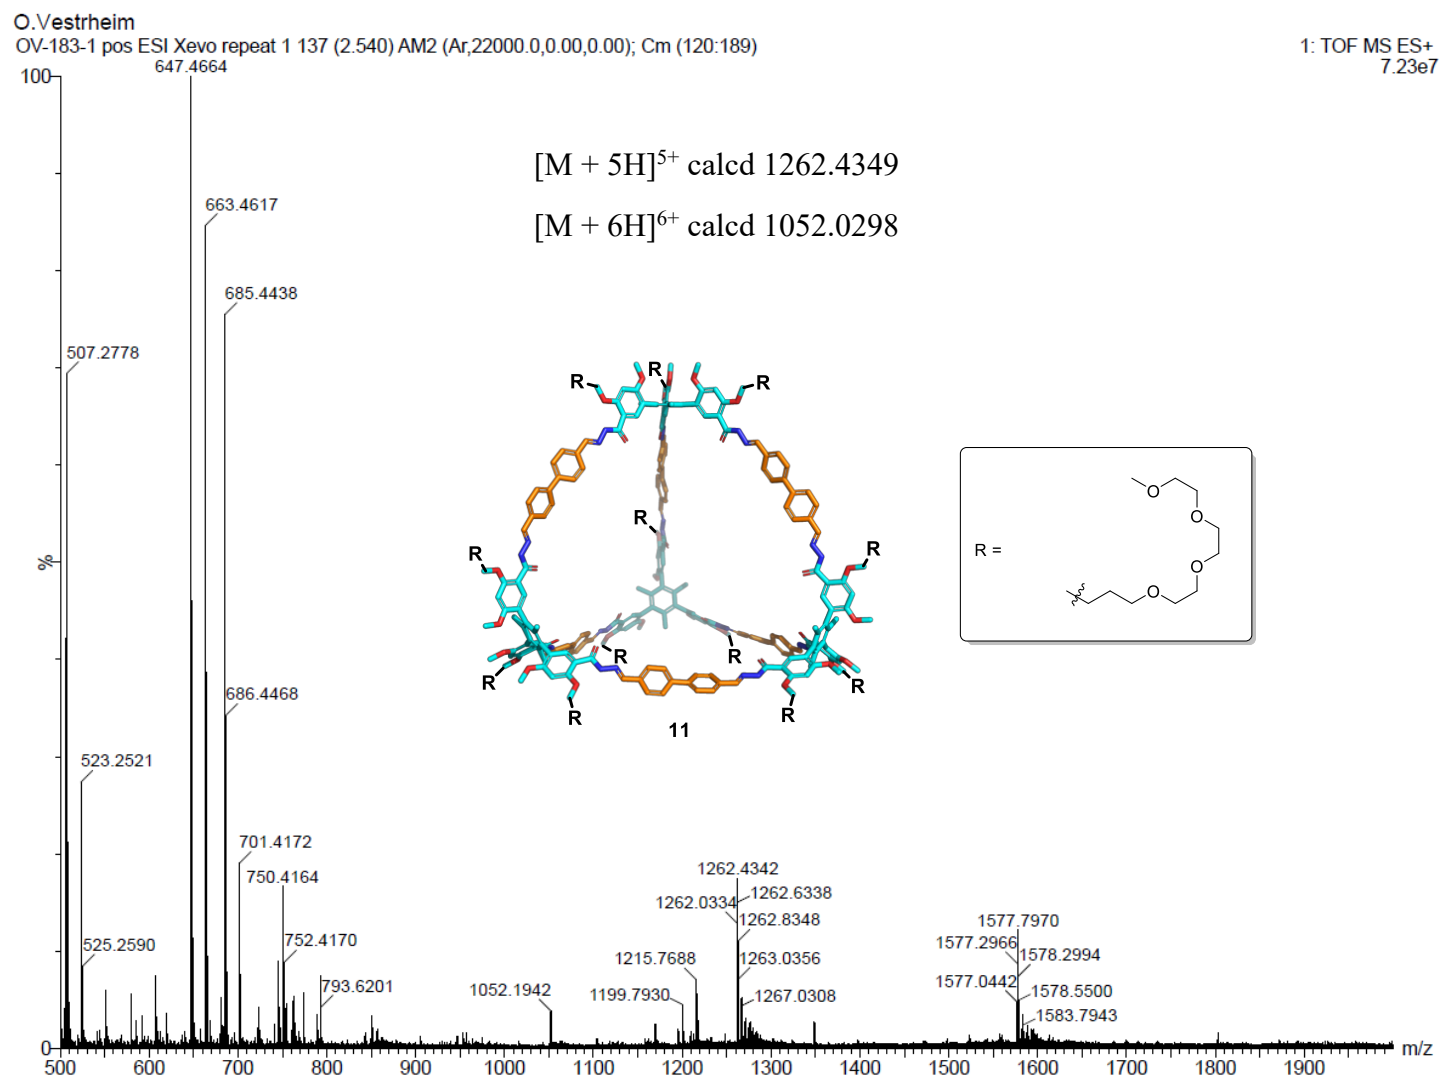

Figure S27. HRMS (ESI+) spectrum of 11.

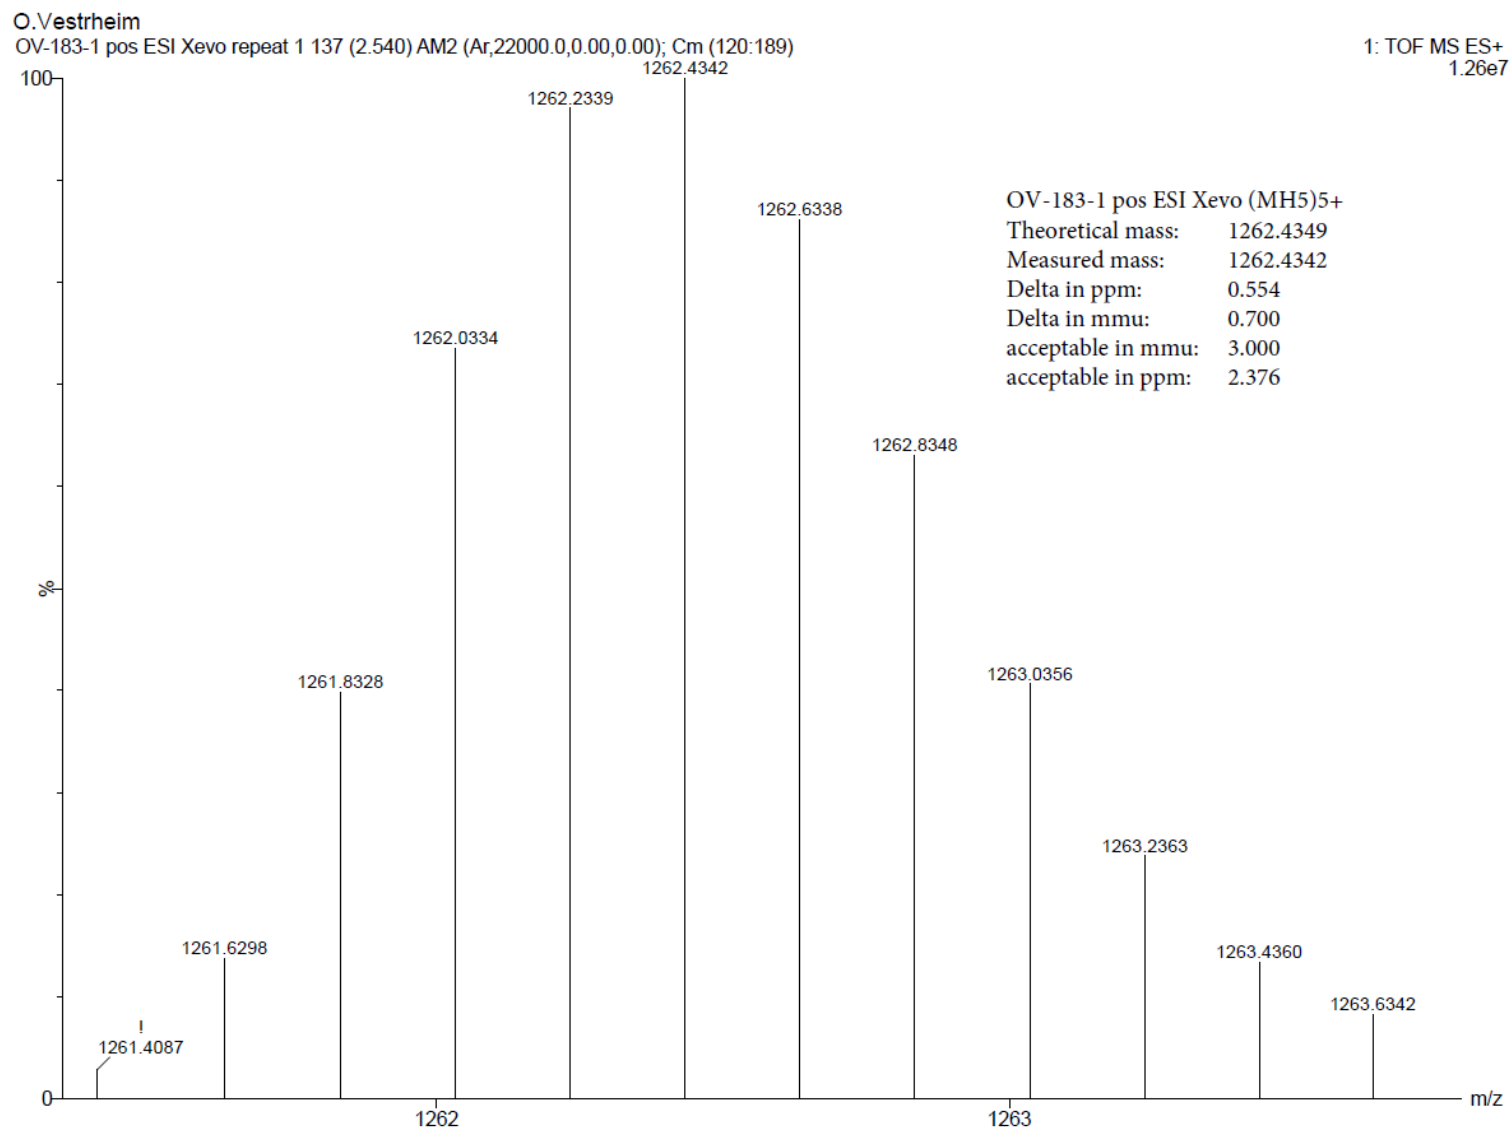

**Figure S28.** Isotopic distribution of the  $[M + 5H]^{5+}$  peak of the HRMS (ESI+) spectrum of **11**.

O. Vestrheim

OV-183-1 pos ESI Xevo repeat 1 137 (2.540) AM2 (Ar,22000.0,0.00,0.00); Cm (120:189)

1: TOF MS ES+  
2.76e6

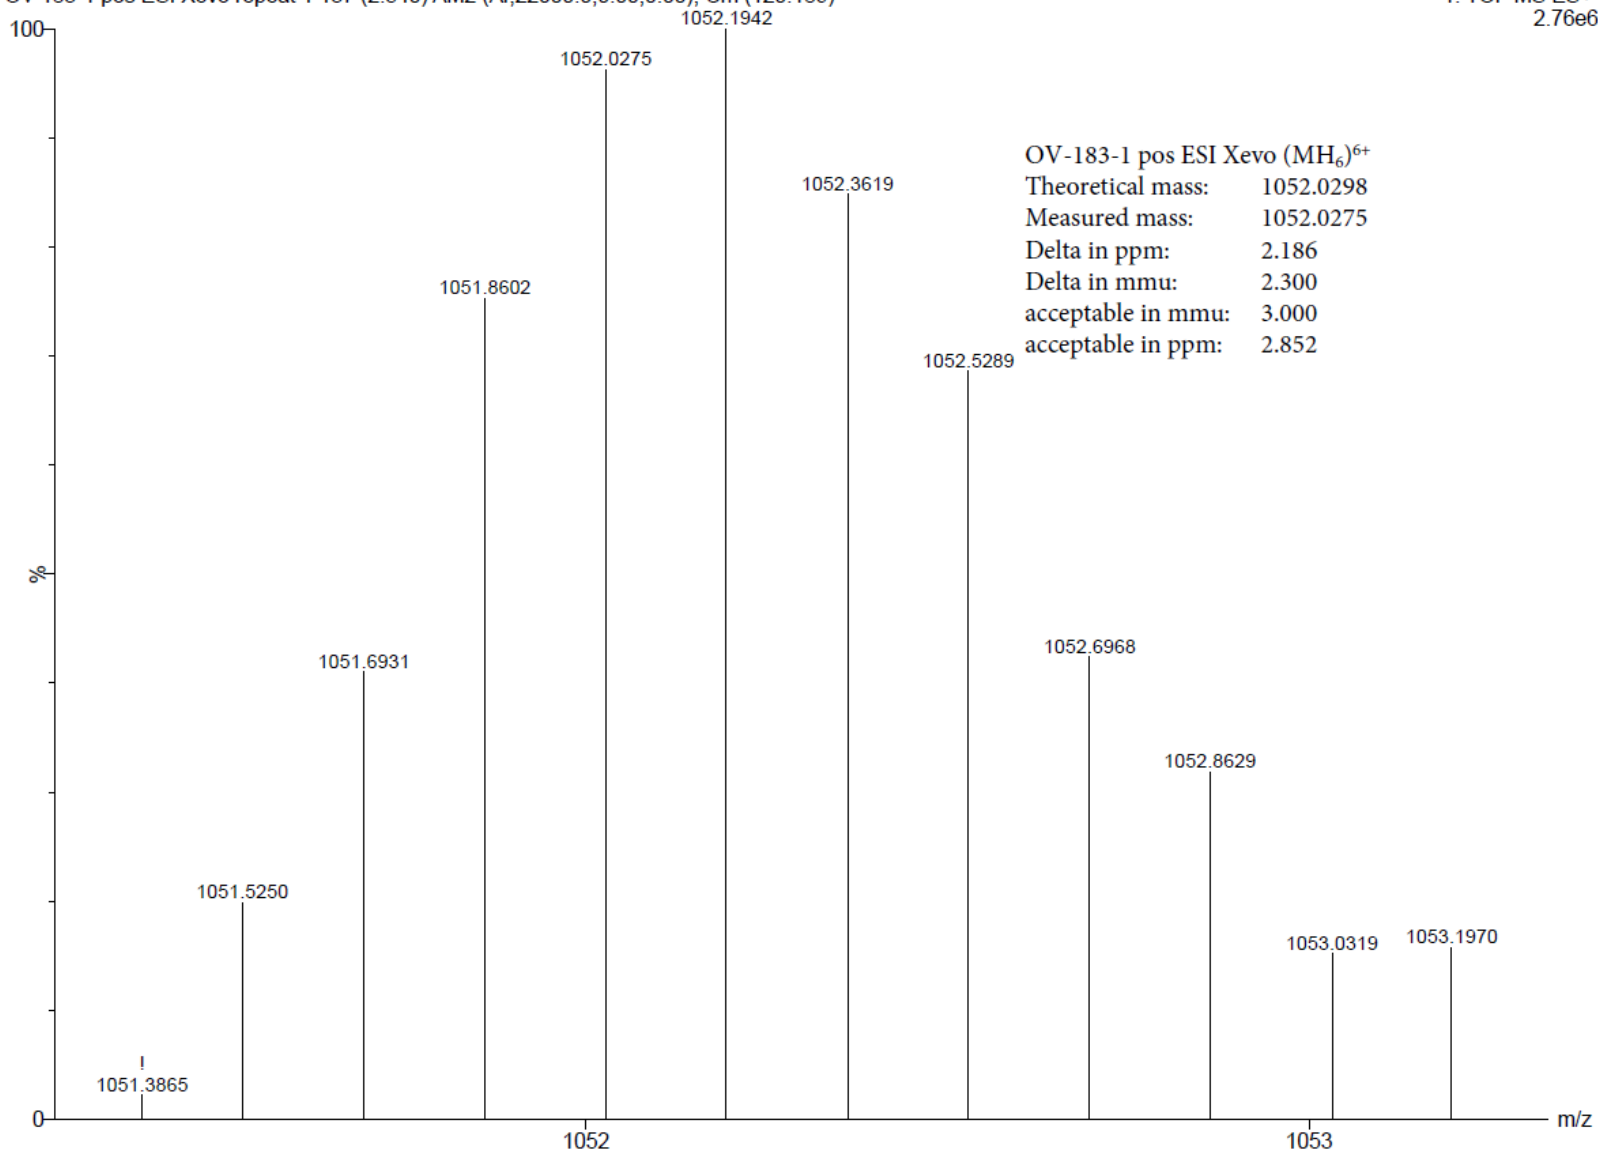

**Figure S29.** Isotopic distribution of the  $[M + 6H]^{6+}$  peak of the HRMS (ESI+) spectrum of **11**.

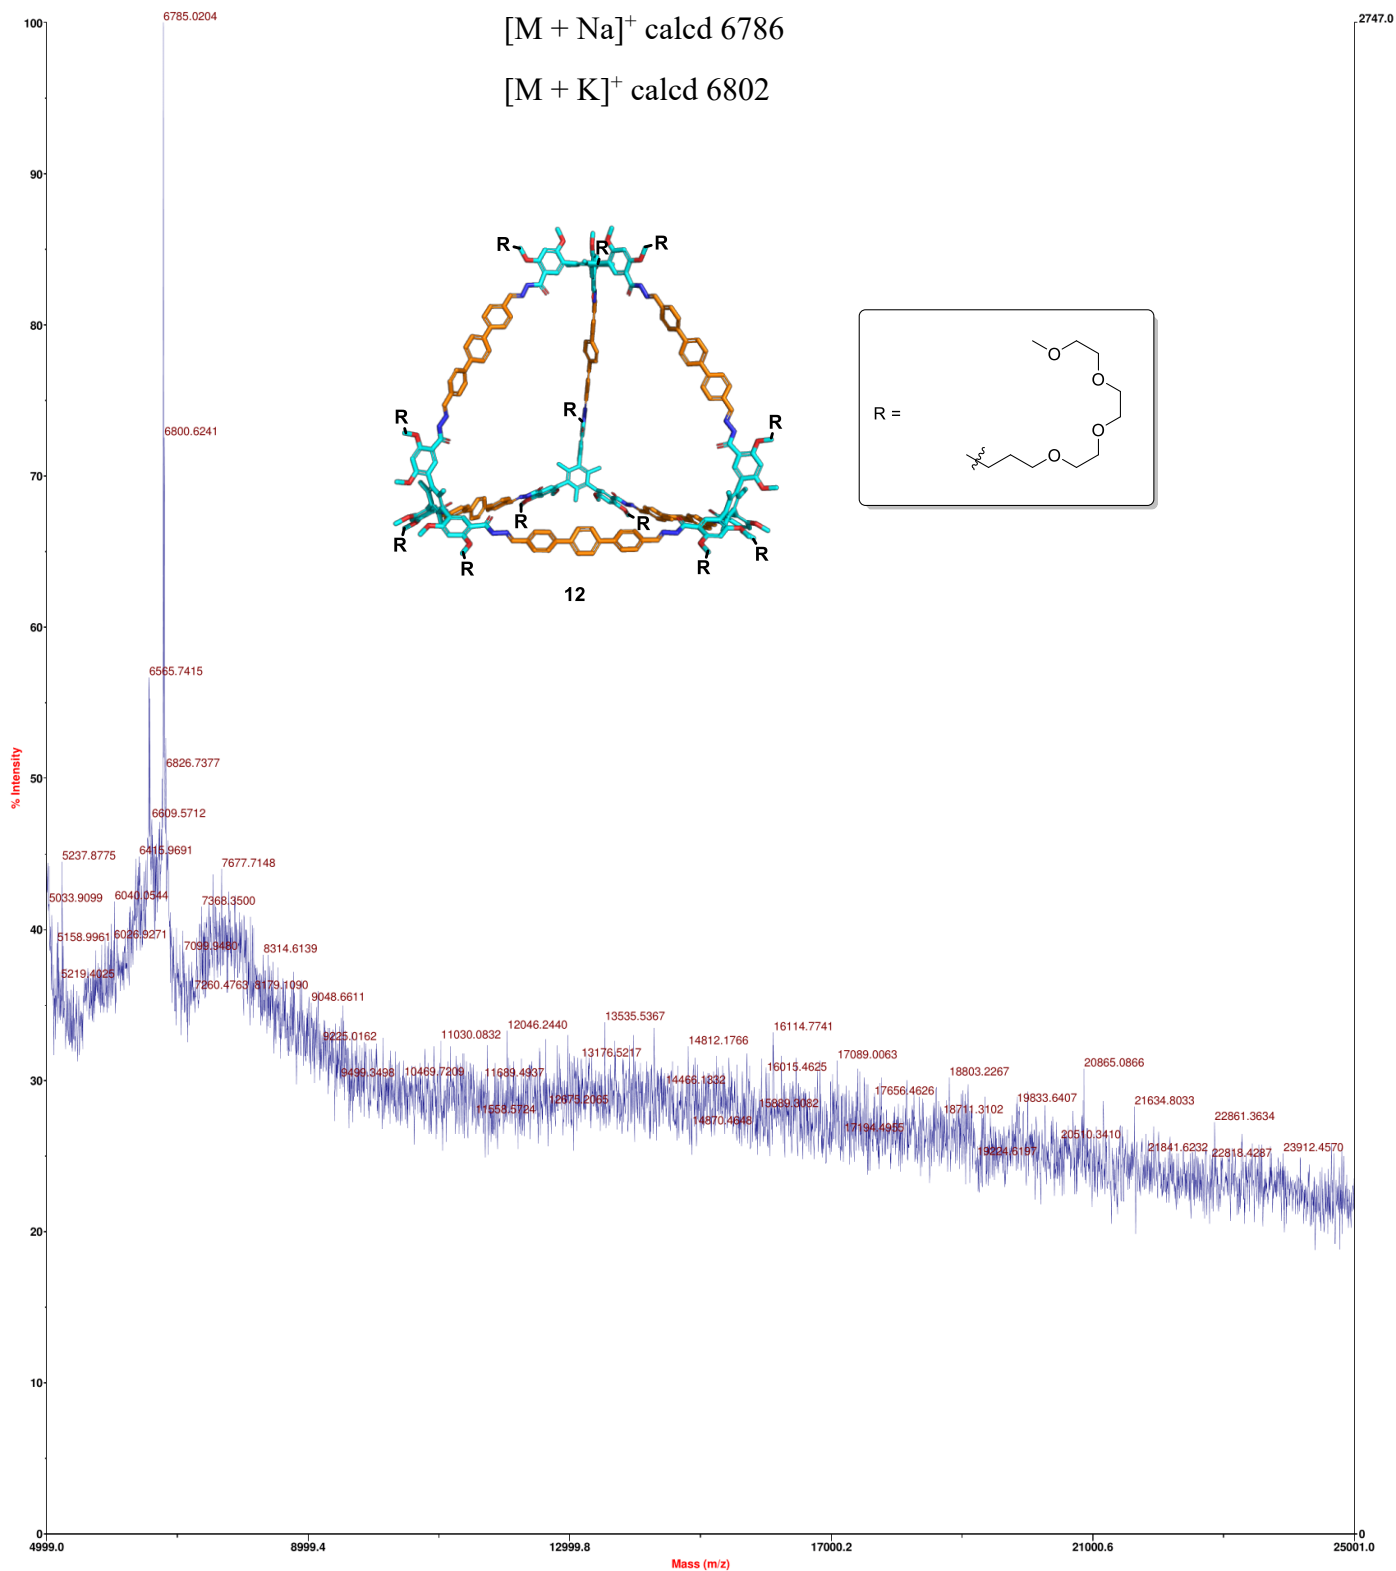

C:\...OV-185\_0001.dat  
 Acquired: 09:09:00, January 31, 2023

**Figure S30.** MALDI-TOF mass spectrum (DCTB matrix) of **12**.

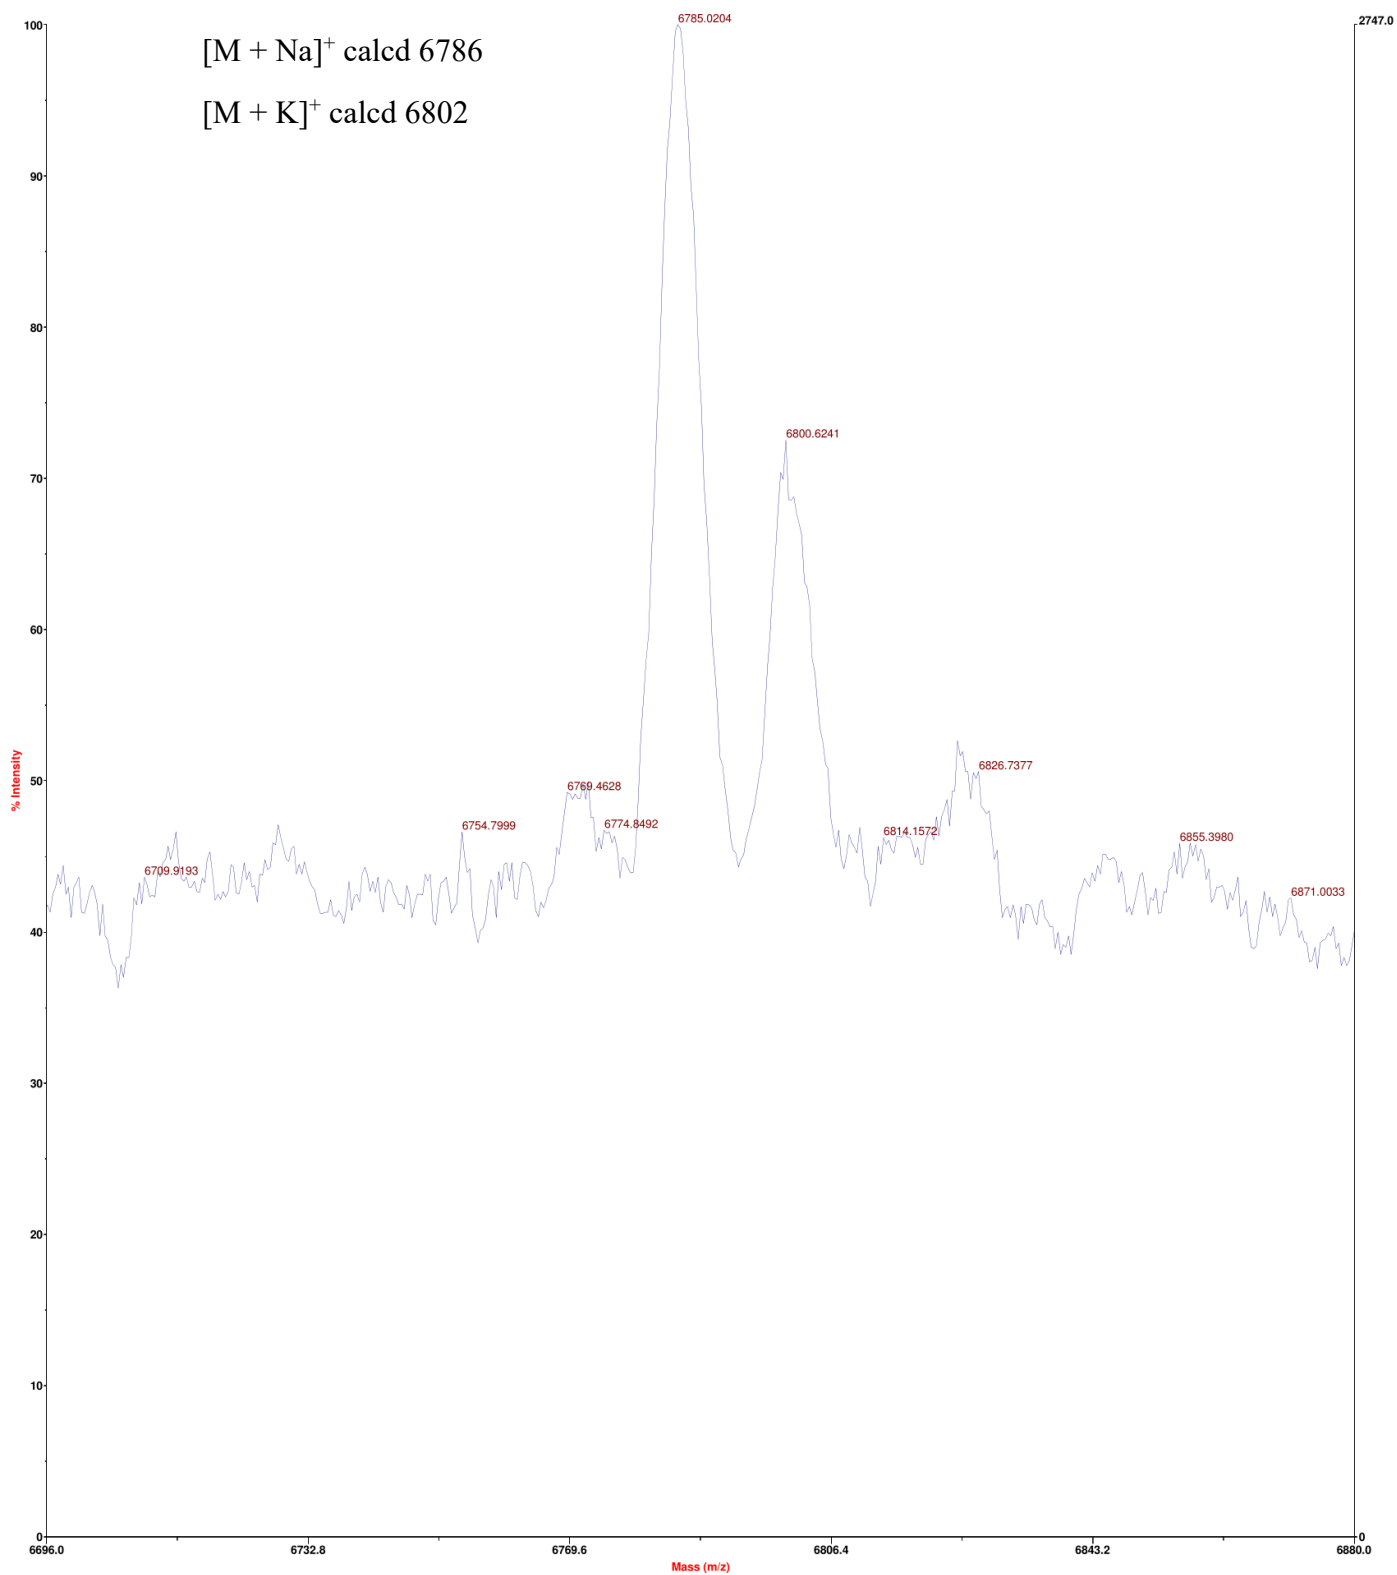

C:\...OV-185\_0001.dat  
Acquired: 09:09:00, January 31, 2023

**Figure S31.** Partial MALDI-TOF mass spectrum (DCTB matrix) of **12**.

$[M + Na]^+$  calcd 7242

$[M + K]^+$  calcd 7258

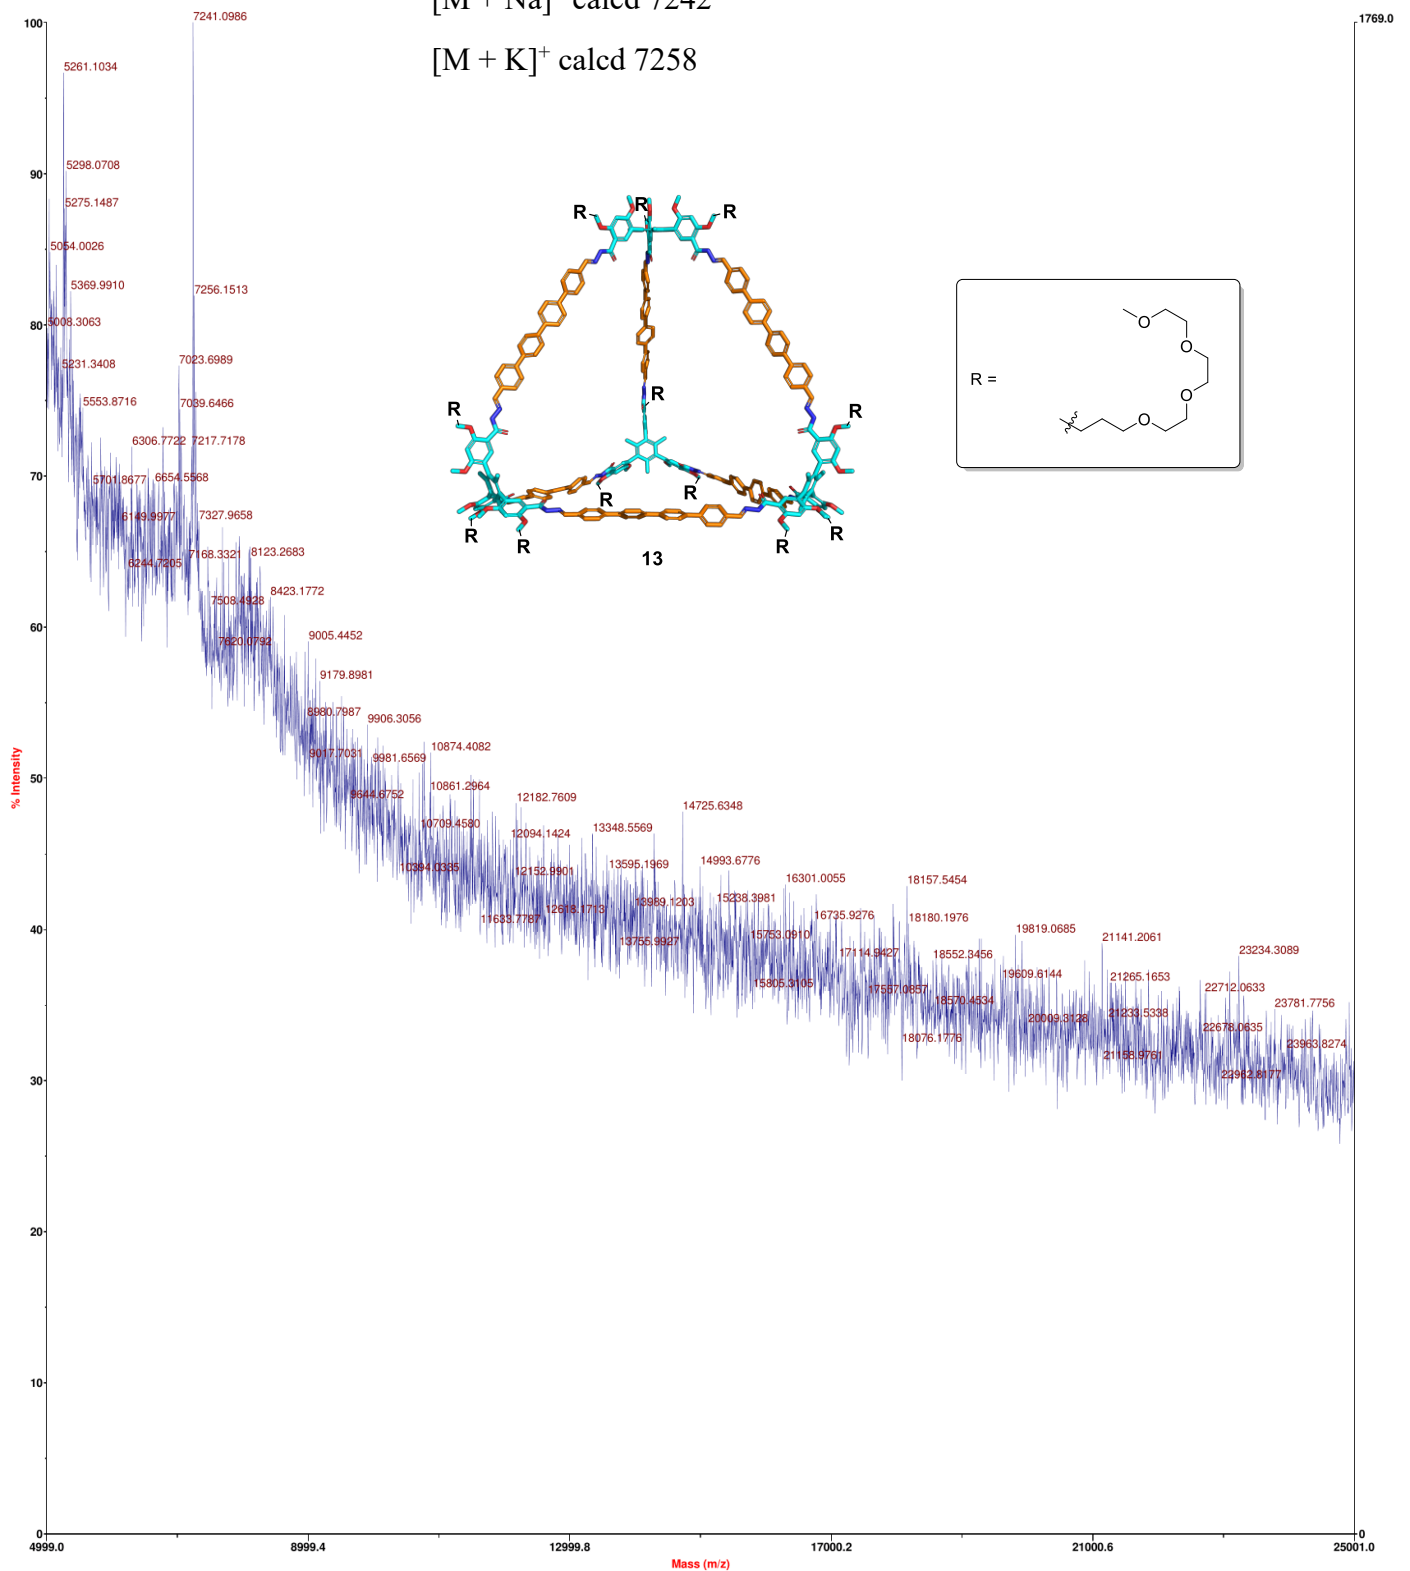

C:\...OV-195\_0001.dat  
 Acquired: 09:18:00, January 31, 2023

**Figure S32.** MALDI-TOF mass spectrum (DCTB matrix) of **13**.



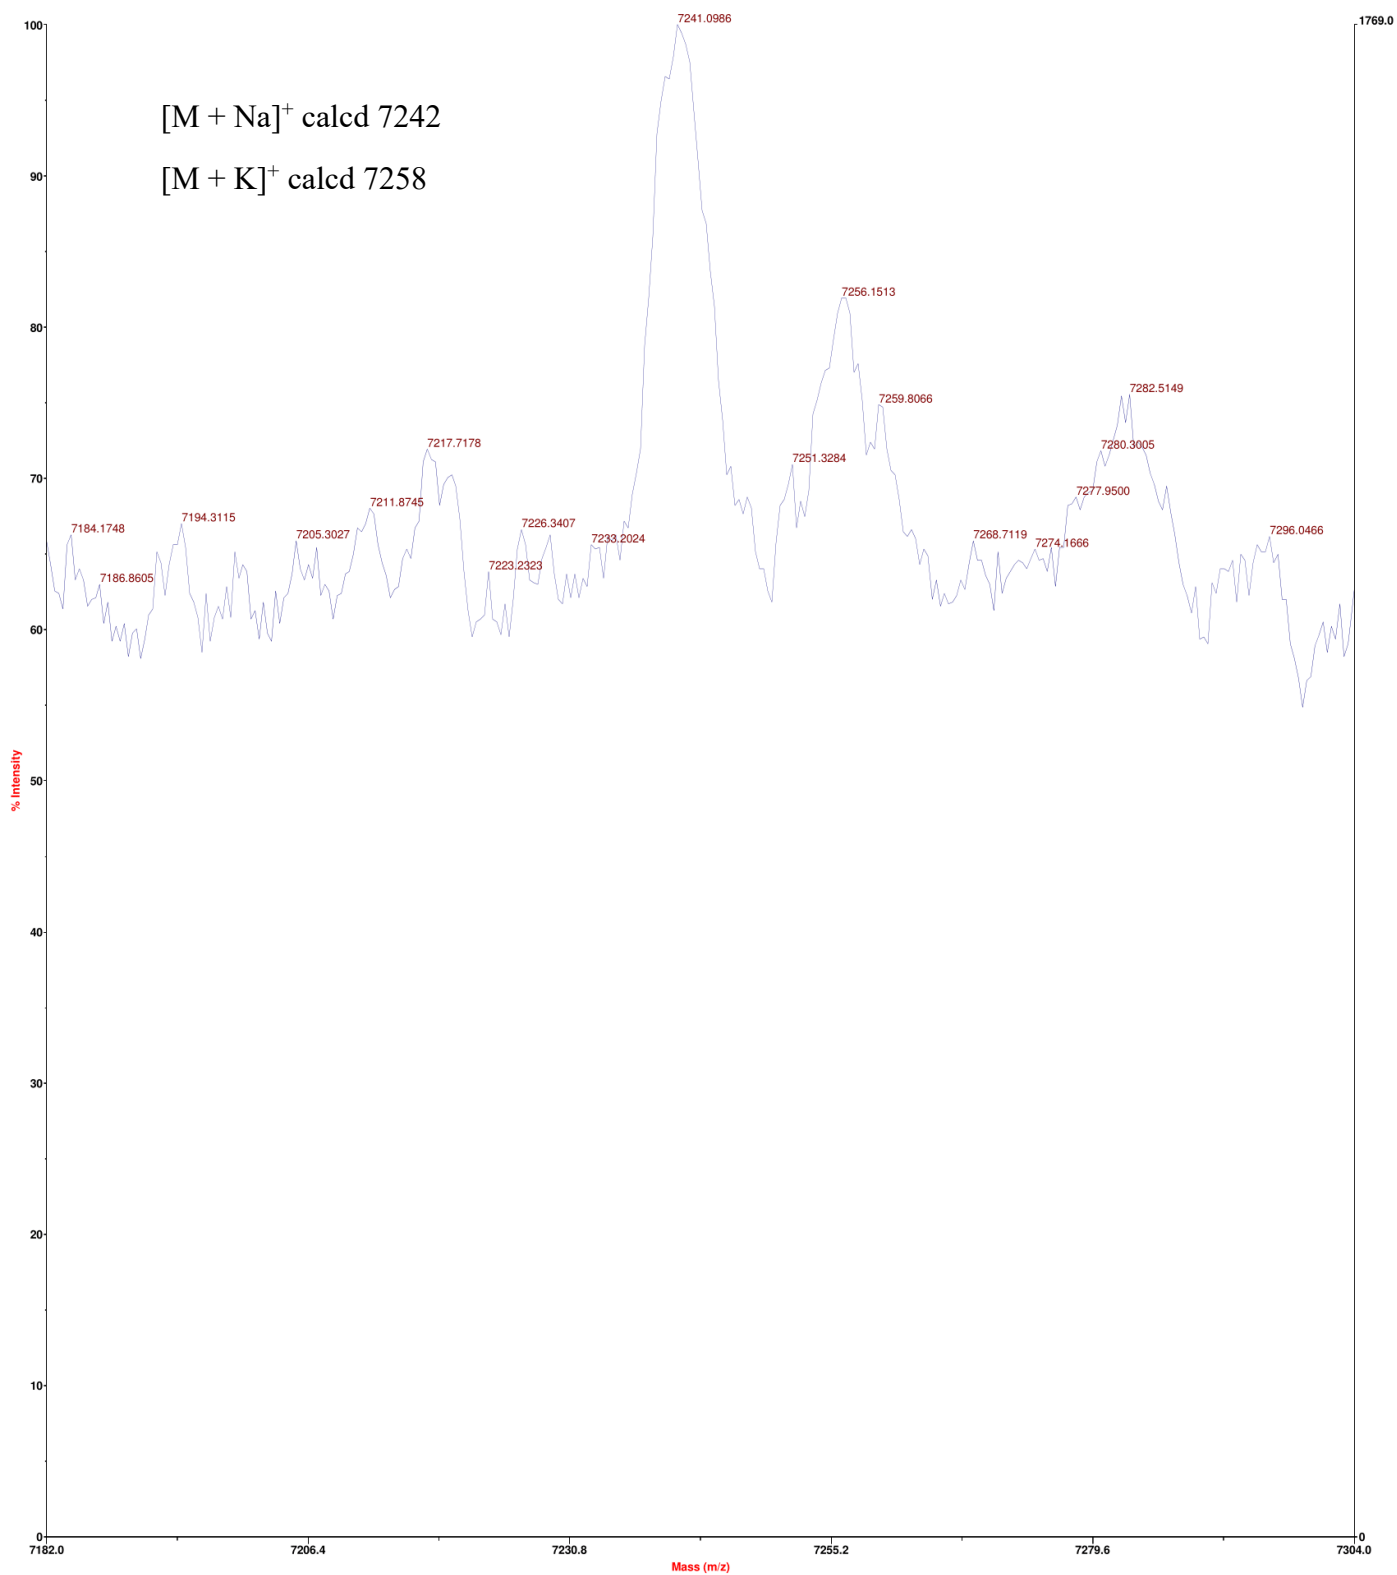

C:\...OV-195\_0001.dat  
Acquired: 09:18:00, January 31, 2023

**Figure S33.** Partial MALDI-TOF mass spectrum (DCTB matrix) of 13.

## VII. Supplemental References

- (1) Jaguar, version 11.8, Schrodinger, Inc., New York, NY, 2022.
- (2) A. D. Bochevarov, E. Harder, T. F. Hughes, J. R. Greenwood, D. A. Braden, D. M. Philipp, D. Rinaldo, M. D. Halls, J. Zhang, R. A. Friesner, *Int. J. Quantum Chem.* **2013**, *113*, 2110–2142.
- (3) A. D. Becke, *J. Chem. Phys.* **1993**, *98*, 5648–5652.
- (4) C. Lee, W. Yang, R.G. Parr, *Phys. Rev. B* **1988**, *37*, 785–789.
- (5) S. H. Vosko, L. Wilk, M. Nusair, *Can. J. Phys.* **1980**, *58*, 1200–1211.
- (6) P. J. Stephens, F. J. Devlin, C. F. Chabalowski, M. J. Frisch, *J. Phys. Chem.* **1994**, *98*, 11623–11627.
